# Supplementary material for: Cp*Co(iii)-Catalyzed oxidative [5+2] annulation: regioselective synthesis of 2-aminobenzoxepines via C–H/O–H functionalization of 2-vinylphenols with ynamides
Source: Royal Society of Chemistry journal article supplement (doi:10.1039/c8cc06807k), 2018-01-01

## *Supporting Information*

# **Cp\*Co(III)-Catalyzed Oxidative [5+2] Annulation: Regioselective Synthesis of 2-Aminobenzoxepines via C-H/O-H Functionalization of 2-Vinylphenols with Ynamides**

Xiang-Lei Han,<sup>a</sup> Xu-Ge Liu,<sup>a</sup> E Lin,<sup>a</sup> Yunyun Chen,<sup>a</sup> Zhuangzhong Chen,<sup>c</sup> Honggen Wang<sup>a</sup> and Qingjiang Li<sup>\*ab</sup>

<sup>a</sup> School of Pharmaceutical Sciences, Sun Yat-sen University, Guangzhou, 510006, China

<sup>b</sup> State Key Laboratory of Natural and Biomimetic Drugs, Peking University, Beijing, 100191, China

<sup>c</sup> The First Clinical Medical College, Guangzhou University of Chinese Medicine, Guangzhou, 510405, China

E-mail: [liqingj3@mail.sysu.edu.cn](mailto:liqingj3@mail.sysu.edu.cn)

## **Table of Contents**

|                                                                             |    |
|-----------------------------------------------------------------------------|----|
| 1. General information .....                                                | 2  |
| 2. Preparation of the starting materials .....                              | 3  |
| 3. General procedure for the synthesis of compounds <b>3</b> .....          | 9  |
| 4. Characterization of products .....                                       | 10 |
| 5. Gram-scale synthesis of compound <b>3ba</b> .....                        | 24 |
| 6. Derivatization of product <b>3aa</b> , <b>3ba</b> , and <b>3ac</b> ..... | 24 |
| 7. Mechanistic studies .....                                                | 27 |
| 8. X-ray data for compounds <b>3aa</b> and <b>3jc</b> .....                 | 30 |
| 9. References .....                                                         | 44 |
| 10. NMR spectrum of some starting materials and products .....              | 44 |

## 1. General information

The solvents used were dried by distillation over the drying agents indicated in parentheses and were transferred under argon: toluene (Na), tetrahydrofuran (Na), and acetonitrile ( $\text{CaH}_2$ ). 2,2,2-Trifluoroethanol (TFE), methanol, *N,N*-dimethylformamide (DMF) and 1,2-dichloroethane (DCE) were purchased from Energy-chemical. Commercially available chemicals were obtained from commercial suppliers and used without further purification unless otherwise stated.

Proton ( $^1\text{H}$ ), fluorine ( $^{19}\text{F}$ ), and carbon ( $^{13}\text{C}$ ) NMR spectra were recorded at 500 (or 400), 376, and 126 (or 101) MHz, respectively. The following abbreviations are used for the multiplicities: s: singlet, d: doublet, t: triplet, q: quartet, m: multiplet, dd = doublet of doublet for proton spectra. Coupling constants ( $J$ ) are reported in hertz (Hz).

High-resolution mass spectra (HRMS) were recorded on a Bruker VPEXII spectrometer with EI and ESI modes unless otherwise stated, and the mass analysis mode of HRMS was TOF.

Analytical thin layer chromatography was performed on Polygram SIL G/UV254 plates. Visualization was accomplished with short wave UV light, or  $\text{KMnO}_4$  staining solutions followed by heating. Flash column chromatography was performed using silica gel (200-300 mesh) with solvents distilled prior to use.

No attempts were made to optimize yields for substrate preparation.

## 2. Preparation of the starting materials

### 2.1 Preparation of substrates 2c, 2e, 2f, 2g and 2h

#### General procedure A:

Following the method reported by Stahl,<sup>[1]</sup> CuCl<sub>2</sub> (0.2 equiv), *N*-methylmethanesulfonamide (2.5 equiv) and Na<sub>2</sub>CO<sub>3</sub> (2.0 equiv) were added to a flame-dried 50 mL three-necked round-bottomed flask. The flask was purged with oxygen for 15 min and a solution of pyridine (2 equiv) in dry toluene (0.2 M) was added. A balloon filled with oxygen was connected to the flask and the stirred mixture was heated at 70 °C. After 15 min, a solution of alkyne (10 mmol, 1 equiv) in dry toluene (0.2 M) was added dropwise. The mixture was allowed to stir at 70 °C for another 16 h and was then cooled to rt. The reaction mixture was concentrated under reduced pressure and the residue was purified by flash chromatography.

#### *N*-(5-Chloropent-1-yn-1-yl)-*N*-methylmethanesulfonamide (2c)

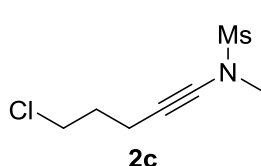

Following the general procedure A, the substrate **2c** was obtained in 38% yield (0.79 g) as a colourless liquid after column chromatography (eluent = petroleum ether/EtOAc 6:1 v/v); <sup>1</sup>H NMR (500 MHz, CDCl<sub>3</sub>) δ = 3.64 (t, *J* = 6.3 Hz, 2H), 3.16 (s, 3H), 3.03 (s, 3H), 2.48 (t, *J* = 6.9 Hz, 2H), 1.97 (p, *J* = 6.7 Hz, 2H). <sup>13</sup>C NMR (126 MHz, CDCl<sub>3</sub>) δ 75.3, 67.4, 43.8, 39.2, 36.3, 31.6, 16.0. HRMS (ESI-TOF): *m/z* calculated for C<sub>7</sub>H<sub>13</sub>ClNO<sub>2</sub>S [M+H]<sup>+</sup>: 210.0350, found: 210.0349.

#### *N*-(5-(1,3-Dioxoisindolin-2-yl)pent-1-yn-1-yl)-*N*-methylmethanesulfonamide (2e)

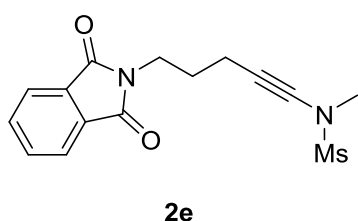

Following the general procedure A, the substrate **2e** was obtained in 78% yield (2.50 g) as a white solid after column chromatography (eluent = petroleum ether/EtOAc 4:1 v/v); <sup>1</sup>H NMR (500 MHz, CDCl<sub>3</sub>) δ = 7.84 (dd, *J* = 5.3, 3.1 Hz, 2H), 7.72 (dd, *J* = 5.5, 3.1 Hz, 2H), 3.79 (t, *J* = 7.1 Hz, 2H), 3.12 (s, 3H), 3.08 (s, 3H), 2.36 (t, *J* = 6.9 Hz, 2H), 1.91

(p,  $J = 6.9$  Hz, 3H).  $^{13}\text{C}$  NMR (126 MHz,  $\text{CDCl}_3$ )  $\delta$  168.5, 134.1, 132.2, 123.4, 75.2, 67.9, 39.2, 37.1, 36.3, 27.8, 16.3. **HRMS (ESI-TOF):**  $m/z$  calculated for  $\text{C}_{15}\text{H}_{17}\text{N}_2\text{O}_4\text{S}$   $[\text{M}+\text{H}]^+$ : 321.0904, found: 321.0898.

#### 5-(*N*-Methylmethanesulfonamido)pent-4-yn-1-yl cinnamate (**2f**)

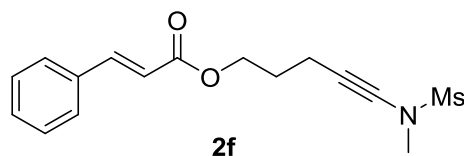

Following the general procedure A, the substrate **2f** was obtained in 48% yield (1.54 g) as a colourless liquid after column chromatography (eluent = petroleum ether/EtOAc 4:1 v/v);  $^1\text{H}$  NMR (400 MHz,  $\text{CDCl}_3$ )  $\delta$  = 7.69 (d,  $J = 16.1$  Hz, 1H), 7.53 (ddd,  $J = 6.0, 3.0, 2.1$  Hz, 2H), 7.41 – 7.37 (m, 3H), 6.44 (d,  $J = 16.0$  Hz, 1H), 4.30 (t,  $J = 6.3$  Hz, 2H), 3.17 (s, 3H), 3.05 (s, 3H), 2.45 (t,  $J = 7.0$  Hz, 2H), 1.93 (p,  $J = 6.7$  Hz, 2H).  $^{13}\text{C}$  NMR (101 MHz,  $\text{CDCl}_3$ )  $\delta$  167.1, 145.1, 134.4, 130.5, 129.1, 128.2, 118.0, 75.1, 67.9, 63.2, 39.3, 36.3, 28.2, 15.4. **HRMS (ESI-TOF):**  $m/z$  calculated for  $\text{C}_{16}\text{H}_{20}\text{NO}_4\text{S}$   $[\text{M}+\text{H}]^+$ : 322.1108, found: 322.1103.

#### *N*-(5-(1*H*-Indol-1-yl)pent-1-yn-1-yl)-*N*-methylmethanesulfonamide (**2g**)

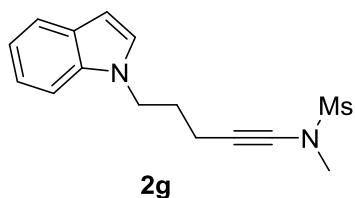

Following the general procedure A, the substrate **2g** was obtained in 39% yield (1.13 g) as a colourless liquid after column chromatography (eluent = petroleum ether/EtOAc 4:1 v/v);  $^1\text{H}$  NMR (500 MHz,  $\text{CDCl}_3$ )  $\delta$  = 7.64 (dt,  $J = 7.9, 1.0$  Hz, 1H), 7.42 – 7.36 (m, 1H), 7.21 (ddd,  $J = 8.2, 6.9, 1.2$  Hz, 1H), 7.14 (d,  $J = 3.2$  Hz, 1H), 7.11 (ddd,  $J = 8.1, 7.0, 1.1$  Hz, 1H), 6.50 (dd,  $J = 3.1, 0.9$  Hz, 1H), 4.27 (t,  $J = 6.6$  Hz, 2H), 3.16 (s, 3H), 3.02 (s, 3H), 2.25 (t,  $J = 6.7$  Hz, 2H), 2.05 (p,  $J = 6.7$  Hz, 2H).  $^{13}\text{C}$  NMR (126 MHz,  $\text{CDCl}_3$ )  $\delta$  136.0, 128.8, 128.2, 121.6, 121.1, 119.4, 109.5, 101.3, 75.4, 67.8, 44.9, 39.2, 36.3, 29.2, 15.9. **HRMS (ESI-TOF):**  $m/z$  calculated for  $\text{C}_{15}\text{H}_{19}\text{N}_2\text{O}_2\text{S}$   $[\text{M}+\text{H}]^+$ : 291.1162, found: 291.1154.

#### *N*-(5-(1*H*-Pyrrol-1-yl)pent-1-yn-1-yl)-*N*-methylmethanesulfonamide (**2h**)

Following the general procedure A, the substrate **2h** was obtained in 42% yield (1.00 g) as a colourless liquid after column chromatography (eluent = petroleum

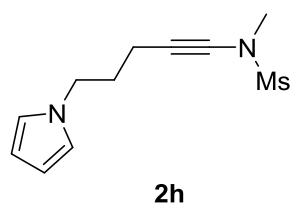

ether/EtOAc 4:1 v/v);  $^1\text{H}$  NMR (400 MHz,  $\text{CDCl}_3$ )  $\delta$  = 6.67 (t,  $J$  = 2.1 Hz, 2H), 6.14 (t,  $J$  = 2.1 Hz, 2H), 4.01 (t,  $J$  = 6.7 Hz, 2H), 3.17 (s, 3H), 3.03 (s, 3H), 2.25 (t,  $J$  = 6.8 Hz, 2H), 1.95 (p,  $J$  = 6.8 Hz, 2H).  $^{13}\text{C}$  NMR (101 MHz,  $\text{CDCl}_3$ )  $\delta$  120.7, 108.2, 75.4, 67.7, 48.0, 39.2, 36.3, 30.6, 15.7. HRMS (ESI-TOF):  $m/z$  calculated for  $\text{C}_{11}\text{H}_{17}\text{N}_2\text{O}_2\text{S}$   $[\text{M}+\text{H}]^+$ : 241.1005, found: 241.0997.

## 2.2 Representative procedure for synthesis of compound 2p:

According to the known procedure:<sup>[2]</sup> Using indole (702 mg, 6.0 mmol),  $\text{K}_3\text{PO}_4$  (2.55 g, 12.0 mmol),  $\text{CuSO}_4 \cdot 5\text{H}_2\text{O}$  (150 mg, 0.6 mmol), 1,10-phenanthroline (216 mg, 1.2 mmol) and 1-bromooct-1-yne (1.52 g, 8.1 mmol) at 70 °C for 28 h. Column chromatography was replaced by filtration through a 5 cm deep x 6.5 cm diameter pad of silica gel eluting with hexane. After the solvent was removed under reduced pressure, the residue was recrystallised from hexane, isolated by filtration, and washed with ice cold hexane (20 mL) to give ynamide **2p** as a pale yellow liquid (0.77 g, 57%).

### 1-(Oct-1-yn-1-yl)-1H-indol (2p)

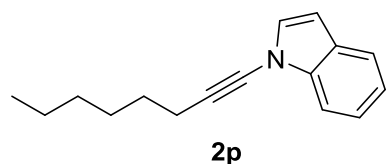

$^1\text{H}$  NMR (400 MHz,  $\text{CDCl}_3$ )  $\delta$  = 7.60 (d,  $J$  = 7.8 Hz, 1H), 7.54 (d,  $J$  = 8.1 Hz, 1H), 7.31 (t,  $J$  = 7.5 Hz, 1H), 7.22 – 7.16 (m, 2H), 6.52 (d,  $J$  = 3.4 Hz, 1H), 2.48 (t,  $J$  = 7.0 Hz, 2H), 1.65 (p,  $J$  = 7.0 Hz, 2H), 1.56 – 1.46 (m, 2H), 1.36 (dq,  $J$  = 7.0, 3.8, 3.3 Hz, 4H), 0.93 (t,  $J$  = 7.1 Hz, 3H).  $^{13}\text{C}$  NMR (101 MHz,  $\text{CDCl}_3$ )  $\delta$  138.4, 129.2, 127.6, 123.3, 121.6, 121.1, 111.2, 104.4, 72.1, 70.2, 31.5, 29.1, 28.7, 22.7, 18.6, 14.2. HRMS (ESI-TOF):  $m/z$  calculated for  $\text{C}_{11}\text{H}_{17}\text{N}_2\text{O}_2\text{S}$   $[\text{M}+\text{H}]^+$ : 226.1590, found: 266.1988.

## 2.3 Representative procedure for synthesis of compound 2k:

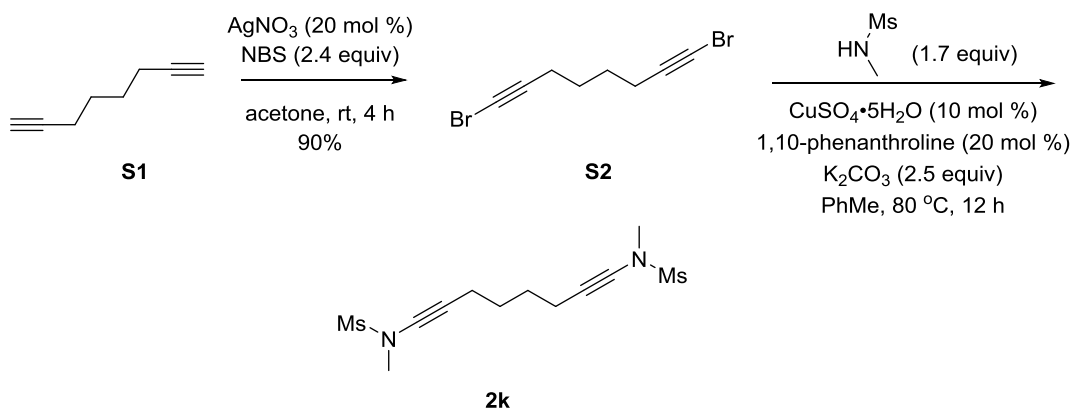

To a solution of octa-1,7-diyne (**S1**) (10.0 mmol, 1.0 equiv) in acetone (30 mL) was added NBS (2.14 g, 12.0 mmol, 1.2 equiv) and  $\text{AgNO}_3$  (169.9 mg, 1.0 mmol, 10 mol %), the resulting mixture was stirred under Ar at room temperature for 4 hours. After removing excess acetone, the reaction was quenched with saturated  $\text{NH}_4\text{Cl}$  solution. The organic layer was extracted with petroleum ether (30 mL x 2), dried over anhydrous  $\text{Na}_2\text{SO}_4$  and concentrated under reduced pressure to afford bromoalkyne **S2**.

To a dried flask was added *N*-methymethanesulphonamide (1.11 g, 10.2 mmol, 1.7 equiv),  $\text{CuSO}_4 \cdot 5\text{H}_2\text{O}$  (150 mg, 0.6 mmol, 10 mol %), 1,10-phenanthroline (216 mg, 1.2 mmol, 20 mol %) and  $\text{K}_2\text{CO}_3$  (2.07 g, 15.0 mmol, 2.5 equiv). The resulting mixture was subsequently treated with anhydrous toluene (25 mL) and bromoalkyne **S2** (6.0 mmol), and stirred at 80 °C for 16 h under Ar. After completion, the crude mixture was cooled to room temperature, filtered through Celite, and concentrated in vacuo. The resulting residue was purified by flash column chromatography on silica gel, giving the pure ynamide **2k** as a white solid (1.4 g, 44%).

***N,N'*-(Octa-1,7-diyne-1,8-diyl)bis(*N*-methylmethanesulfonamide) (**2k**)**

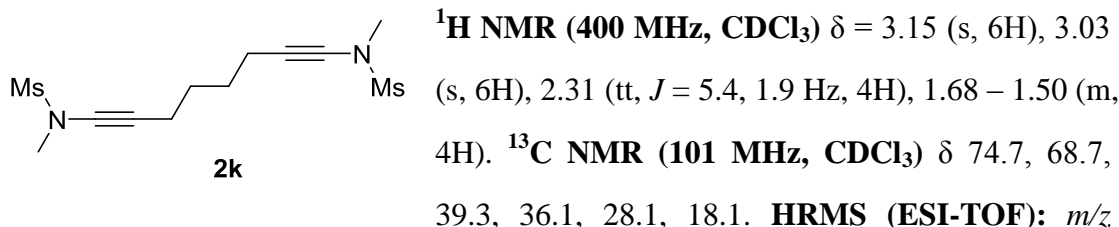

calculated for  $\text{C}_{12}\text{H}_{21}\text{N}_2\text{O}_4\text{S}_2$   $[\text{M}+\text{H}]^+$ : 321.0937, found: 321.0922.

**2.4 Representative procedure for synthesis of compound 2i:**

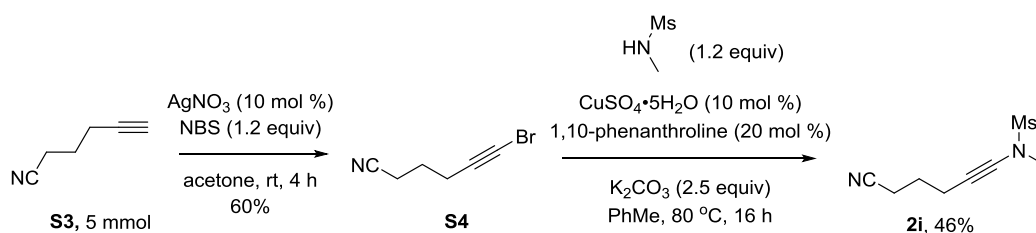

To a solution of hex-5-ynenitrile (**S3**) (5.0 mmol, 1.0 equiv) in acetone (20 mL) was added NBS (1.07 g, 6.0 mmol, 1.2 equiv) and  $\text{AgNO}_3$  (80.0 mg, 0.5 mmol, 10 mol %), the resulting mixture was stirred under Ar at room temperature for 4 hours. After removing excess acetone, the reaction was quenched with saturated  $\text{NH}_4\text{Cl}$  solution. The organic layer was extracted with petroleum ether (20 mL x 2), dried over anhydrous  $\text{Na}_2\text{SO}_4$  and concentrated under reduced pressure to afford bromoalkyne **S4**.

To a dried flask was added *N*-methymethanesulphonamide (0.39 g, 3.6 mmol, 1.2 equiv),  $\text{CuSO}_4 \cdot 5\text{H}_2\text{O}$  (75 mg, 0.3 mmol, 10 mol %), 1,10-phenanthroline (108 mg, 0.6 mmol, 20 mol %) and  $\text{K}_2\text{CO}_3$  (1.04 g, 7.5 mmol, 2.5 equiv). The resulting mixture was subsequently treated with anhydrous toluene (15 mL) and bromoalkyne **S4** (3.0 mmol), and stirred at 80 °C for 16 h under Ar. After completion, the crude mixture was cooled to room temperature, filtered through Celite, and concentrated in vacuo. The resulting residue was purified by flash column chromatography on silica gel, giving the pure ynamide **2i** as a colourless liquid (276 mg, 46%).

#### *N*-(5-Cyanopent-1-yn-1-yl)-*N*-methymethanesulfonamide (**2i**)

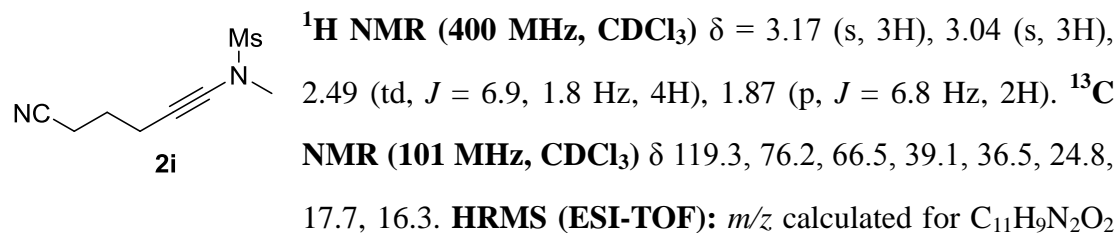

$[\text{M}+\text{H}]^+$ : 201.0659, found: 201.0658.

#### 2.5 Representative procedure for synthesis of compound **2j**:

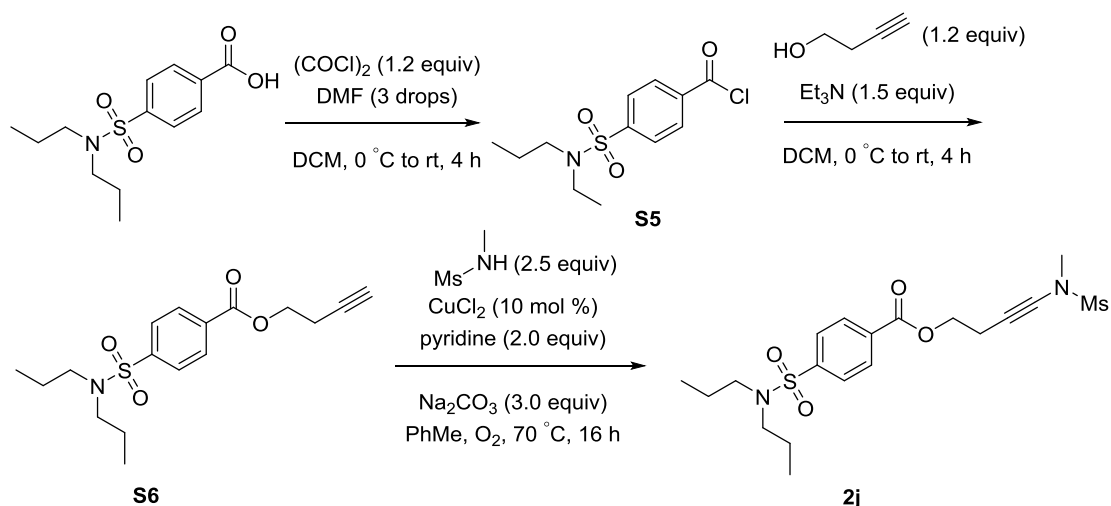

To a solution of 4-(*N,N*-dipropylsulfamoyl)benzoic acid (10 mmol) and DMF (3 drops) in  $\text{CH}_2\text{Cl}_2$  (30 mL) under  $\text{N}_2$  atmosphere was dropwise added oxalyl chloride (1.0 mL, 12 mmol) at 0 °C. After 5 min, the mixture was stirred at room temperature for 6 h, then solvent was removed under reduced pressure to give the residue **S5**. To a solution of but-3-yn-1-ol (15 mmol),  $\text{Et}_3\text{N}$  (2.08 mL, 7.5 mmol) in  $\text{CH}_2\text{Cl}_2$  (30 mL) under  $\text{N}_2$  atmosphere was dropwise added **S5** (dissolved in 15 mL) at 0 °C. Then, the mixture was stirred at room temperature for 6 h. After 6 h, the reaction mixture was concentrated under reduced pressure and the residue was purified by flash chromatography to give the pure **S6** as a colourless liquid (95%).

$\text{CuCl}_2$  (0.2 equiv), *N*-methylmethanesulfonamide (2.5 equiv) and  $\text{Na}_2\text{CO}_3$  (2.0 equiv) were added to a flame-dried 50 mL three-necked round-bottomed flask. The flask was purged with oxygen for 15 min and a solution of pyridine (2 equiv) in dry toluene (0.2 M) was added. A balloon filled with oxygen was connected to the flask and the stirred mixture was heated at 70 °C. After 15 min, a solution of alkyne **S6** (4 mmol, 1 equiv) in dry toluene (0.2 M) was added dropwise. The mixture was allowed to stir at 70 °C for another 16 h and was then cooled to rt. The reaction mixture was concentrated under reduced pressure and the residue was purified by flash chromatography to afford the pure ynamide **2j** (0.75 g, 42%) as a colourless liquid.

**4-(*N*-Methylmethanesulfonamido)but-3-yn-1-yl 4-(*N,N*-dipropylsulfamoyl)benzoate (**2j**)**



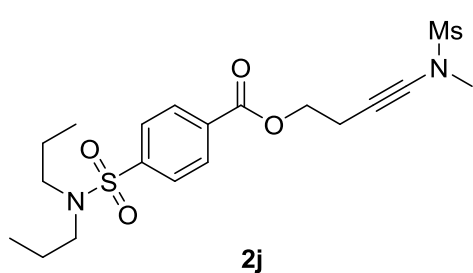

**$^1\text{H}$  NMR (400 MHz,  $\text{CDCl}_3$ )**  $\delta$  = 8.15 (d,  $J$  = 8.5 Hz, 2H), 7.85 (d,  $J$  = 8.5 Hz, 2H), 4.42 (t,  $J$  = 6.7 Hz, 2H), 3.13 (s, 3H), 3.10 – 3.05 (m, 2H), 2.99 (s, 3H), 2.76 (t,  $J$  = 6.7 Hz, 2H), 1.52 (h,  $J$  = 7.4 Hz, 4H), 0.84 (t,  $J$  = 7.4 Hz, 6H).

**$^{13}\text{C}$  NMR (101 MHz,  $\text{CDCl}_3$ )**  $\delta$  165.1, 144.5, 133.3, 130.4, 127.1, 75.9, 64.8, 63.4, 49.9, 39.1, 36.4, 21.9, 19.2, 11.2. **HRMS (ESI-TOF):**  $m/z$  calculated for  $\text{C}_{19}\text{H}_{29}\text{N}_2\text{O}_6\text{S}_2$   $[\text{M}+\text{H}]^+$ : 445.1462, found: 445.1465.

### 3. General procedure for the synthesis of compounds 3

#### General Procedure B:

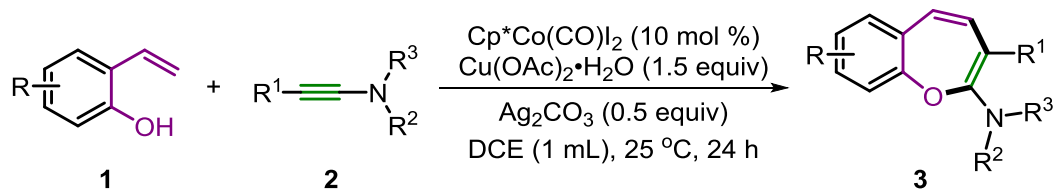

2-Vinylphenols **1** (0.3 mmol, 1.5 equiv),  $[\text{Cp}^*\text{Co(CO)I}_2]$  (9.8 mg, 10 mol%),  $\text{Cu(OAc)}_2 \cdot \text{H}_2\text{O}$  (60 mg, 1.5 equiv),  $\text{Ag}_2\text{CO}_3$  (28 mg, 0.5 equiv), DCE (1.0 mL) and ynamides **2** (0.2 mmol) were added to a 15 mL Schlenk tube. The mixture was stirred at 25  $^\circ\text{C}$  for 24 h under air, then the reaction mixture was diluted with EtOAc (10 mL) and  $\text{H}_2\text{O}$  (10 mL). The organic layer was separated and the aqueous phase was extracted with EtOAc (3  $\times$  10 mL). The combined organic layer was washed with brine (10 mL), dried over  $\text{Na}_2\text{SO}_4$ , and concentrated under reduced pressure. The residue was purified by column chromatography on silica gel to afford the desired products **3**.

## 4. Characterization of products

### *N*-methyl-*N*-(3-phenethylbenzo[*b*]oxepin-2-yl)methanesulfonamide (**3aa**)

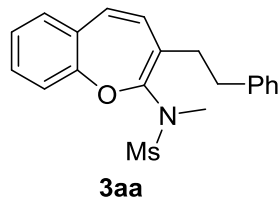

Following the general procedure B, the product **3aa** was obtained in 72% yield (51.1 mg) as a white solid after column chromatography (eluent = petroleum ether/EtOAc 6:1 v/v); (PE/EA = 4/1,  $R_F \approx 0.37$ ).  $^1\text{H}$  NMR (400 MHz,  $\text{CDCl}_3$ )  $\delta$  = 7.29 (ddd,  $J$  = 7.9, 6.6, 2.5 Hz, 1H), 7.25 – 7.13 (m, 2H), 7.07 – 6.98 (m, 3H), 7.00 – 6.91 (m, 2H), 6.85 (d,  $J$  = 8.0 Hz, 1H), 6.81 (d,  $J$  = 11.3 Hz, 1H), 6.15 (d,  $J$  = 11.2 Hz, 1H), 3.04 (s, 3H), 2.68 (s, 2H), 2.58 (s, 2H), 2.56 (s, 3H).  $^{13}\text{C}$  NMR (126 MHz,  $\text{CDCl}_3$ )  $\delta$  156.9, 142.7, 141.0, 132.1, 130.8, 130.3, 130.2, 129.1, 128.9, 128.1, 125.9, 125.3, 124.6, 120.6, 38.3, 36.4, 34.7, 34.1. HRMS (ESI-TOF):  $m/z$  calculated for  $\text{C}_{10}\text{H}_{22}\text{NO}_3\text{S}$   $[\text{M}+\text{H}]^+$ : 356.1315, found: 356.1332.

### *N*-(3-Hexylbenzo[*b*]oxepin-2-yl)-*N*-methylmethanesulfonamide (**3ab**)

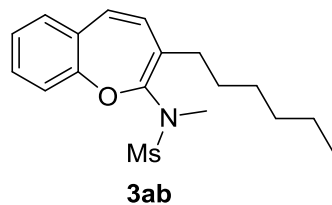

Following the general procedure B, the product **3ab** was obtained in 70% yield (46.9 mg) as a colourless liquid after column chromatography (eluent = petroleum ether/EtOAc 6:1 v/v); (PE/EA = 6/1,  $R_F \approx 0.21$ ).  $^1\text{H}$  NMR (500 MHz,  $\text{CDCl}_3$ )  $\delta$  = 7.33 – 7.25 (m, 1H), 7.17 – 7.10 (m, 2H), 6.96 (d,  $J$  = 8.1 Hz, 1H), 6.72 (d,  $J$  = 11.3 Hz, 1H), 6.09 (d,  $J$  = 11.3 Hz, 1H), 3.17 (s, 3H), 3.11 (s, 3H), 2.28 (d,  $J$  = 12.1 Hz, 2H), 1.42 – 1.32 (m, 2H), 1.29 – 1.16 (m, 6H), 0.83 (t,  $J$  = 6.8 Hz, 3H).  $^{13}\text{C}$  NMR (126 MHz,  $\text{CDCl}_3$ )  $\delta$  157.1, 141.7, 131.5, 130.6, 130.2, 130.2, 129.4, 126.1, 125.3, 120.5, 38.5, 37.3, 31.8, 31.7, 29.1, 28.5, 22.6, 14.1. HRMS (ESI-TOF):  $m/z$  calculated for  $\text{C}_{18}\text{H}_{26}\text{NO}_3\text{S}$   $[\text{M}+\text{H}]^+$ : 336.1628, found: 336.1617.

### *N*-(3-(3-Chloropropyl)benzo[*b*]oxepin-2-yl)-*N*-methylmethanesulfonamide (**3ac**)

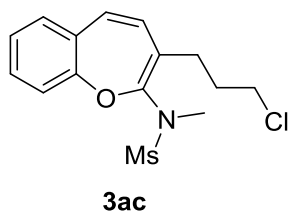

Following the general procedure B, the product **3ac** was obtained in 72% yield (47.1 mg) as a colourless liquid after column chromatography (eluent = petroleum ether/EtOAc 6:1 v/v); (PE/EA = 4/1,  $R_F \approx 0.30$ ).  **$^1\text{H}$  NMR (400 MHz,  $\text{CDCl}_3$ )**  $\delta$  = 7.31 (dp,  $J$  = 8.4, 4.0 Hz, 1H), 7.15 (d,  $J$  = 4.5 Hz, 2H), 6.96 (d,  $J$  = 8.1 Hz, 1H), 6.74 (d,  $J$  = 11.2 Hz, 1H), 6.07 (d,  $J$  = 11.2 Hz, 1H), 3.46 (t,  $J$  = 6.5 Hz, 2H), 3.18 (s, 3H), 3.11 (s, 3H), 2.44 (s, 2H), 1.89 (p,  $J$  = 7.5 Hz, 2H).  **$^{13}\text{C}$  NMR (101 MHz,  $\text{CDCl}_3$ )**  $\delta$  156.9, 142.6, 132.0, 130.5, 130.4, 129.5, 129.4, 125.4, 124.3, 120.6, 44.5, 38.5, 37.2, 31.4, 29.0. **HRMS (ESI-TOF):**  $m/z$  calculated for  $\text{C}_{15}\text{H}_{19}\text{ClNO}_3\text{S}$   $[\text{M}+\text{H}]^+$ : 328.0769, found: 328.0764.

***N*-(3-(3-(benzyloxy)propyl)benzo[*b*]oxepin-2-yl)-*N*-methylmethanesulfonamide (3ad)**

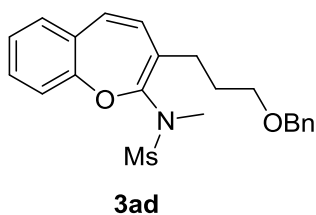

Following the general procedure B, the product **3ad** was obtained in 56% yield (44.7 mg) as a colourless liquid after column chromatography (eluent = petroleum ether/EtOAc 6:1 v/v); (PE/EA = 4/1,  $R_F \approx 0.29$ ).  **$^1\text{H}$  NMR (500 MHz,  $\text{CDCl}_3$ )**  $\delta$  = 7.36 – 7.25 (m, 6H), 7.14 (d,  $J$  = 4.0 Hz, 2H), 6.96 (d,  $J$  = 8.1 Hz, 1H), 6.72 (d,  $J$  = 11.3 Hz, 1H), 6.10 (d,  $J$  = 11.3 Hz, 1H), 4.44 (s, 2H), 3.43 (t,  $J$  = 6.4 Hz, 2H), 3.14 (s, 3H), 3.09 (s, 3H), 2.37 (s, 2H), 1.74 (q,  $J$  = 7.4 Hz, 2H).  **$^{13}\text{C}$  NMR (126 MHz,  $\text{CDCl}_3$ )**  $\delta$  157.0, 142.0, 138.6, 131.6, 130.5, 130.28, 130.0, 129.4, 128.5, 127.8, 127.6, 125.4, 125.3, 120.6, 72.9, 69.8, 38.6, 37.2, 28.7, 28.4. **HRMS (ESI-TOF):**  $m/z$  calculated for  $\text{C}_{22}\text{H}_{26}\text{NO}_4\text{S}$   $[\text{M}+\text{H}]^+$ : 400.1577, found: 400.1583.

***N*-(3-(3-(1,3-dioxoisindolin-2-yl)propyl)benzo[*b*]oxepin-2-yl)-*N*-methylmethanesulfonamide (3ae)**

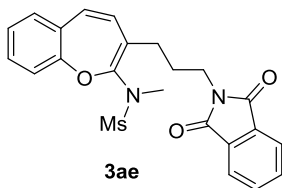

Following the general procedure B, the product **3ae** was obtained in 63% yield (55.2 mg) as a colourless liquid after column chromatography (eluent = petroleum ether/EtOAc 4:1 v/v); (PE/EA = 2/1,  $R_F \approx 0.25$ ).  **$^1\text{H}$  NMR (400 MHz,  $\text{CDCl}_3$ )**

$\delta = 7.80$  (dd,  $J = 5.4, 3.1$  Hz, 2H),  $7.68$  (dd,  $J = 5.4, 3.1$  Hz, 2H),  $7.32 - 7.24$  (m, 1H),  $7.13 - 7.06$  (m, 2H),  $6.97 - 6.90$  (m, 1H),  $6.71$  (d,  $J = 11.4$  Hz, 1H),  $6.08$  (d,  $J = 11.2$  Hz, 1H),  $3.63$  (t,  $J = 7.5$  Hz, 2H),  $3.17$  (s, 3H),  $3.08$  (s, 3H),  $2.36$  (t,  $J = 6.9$  Hz, 2H),  $1.80$  (q,  $J = 7.8$  Hz, 2H).  **$^{13}\text{C}$  NMR (101 MHz,  $\text{CDCl}_3$ )**  $\delta$  168.4, 156.9, 142.2, 134.0, 132.2, 131.9, 130.4, 130.3, 129.5, 129.4, 125.4, 124.7, 123.3, 120.6, 38.4, 37.8, 37.1, 29.2, 27.5. **HRMS (ESI-TOF):**  $m/z$  calculated for  $\text{C}_{23}\text{H}_{23}\text{N}_2\text{O}_5\text{S}$   $[\text{M}+\text{H}]^+$ : 439.1322, found: 439.1327.

### 3-(2-(Dimethylamino)benzo[*b*]oxepin-3-yl)propyl cinnamate (**3af**)

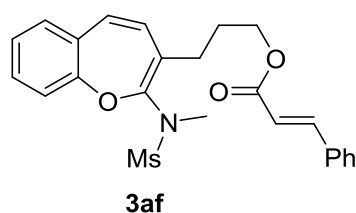

Following the general procedure B, the product **3af** was obtained in 62% yield (54.5 mg) as a white solid after column chromatography (eluent = petroleum ether/EtOAc 6:1 v/v); ( $\text{PE}/\text{EA} = 4/1$ ,  $R_F \approx 0.30$ ).  **$^1\text{H}$  NMR (500 MHz,  $\text{CDCl}_3$ )**  $\delta = 7.67$  (d,  $J = 16.0$  Hz, 1H),  $7.55 - 7.49$  (m, 2H),  $7.41 - 7.35$  (m, 3H),  $7.29$  (t,  $J = 7.2$  Hz, 1H),  $7.13$  (d,  $J = 8.4$  Hz, 2H),  $6.95$  (d,  $J = 8.1$  Hz, 1H),  $6.75$  (d,  $J = 11.2$  Hz, 1H),  $6.39$  (d,  $J = 16.0$  Hz, 1H),  $6.10$  (d,  $J = 11.3$  Hz, 1H),  $4.14$  (t,  $J = 6.8$  Hz, 2H),  $3.17$  (s, 3H),  $3.11$  (s, 3H),  $2.52 - 2.40$  (m, 2H),  $1.83$  (s, 2H).  **$^{13}\text{C}$  NMR (126 MHz,  $\text{CDCl}_3$ )**  $\delta$  167.1, 156.9, 144.9, 142.4, 134.5, 132.0, 130.4, 130.3, 129.6, 129.5, 129.0, 128.2, 125.4, 124.8, 120.5, 118.1, 63.9, 38.5, 37.1, 28.4, 27.7. **HRMS (ESI-TOF):**  $m/z$  calculated for  $\text{C}_{24}\text{H}_{26}\text{NO}_5\text{S}$   $[\text{M}+\text{H}]^+$ : 440.1526, found: 440.1522.

### *N*-(3-(3-(1*H*-indol-1-yl)propyl)benzo[*b*]oxepin-2-yl)-*N*-methylmethanesulfonamide (**3ag**)

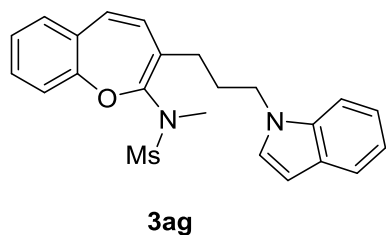

Following the general procedure B, the product **3ag** was obtained in 58% yield (47.3 mg) as a colourless liquid after column chromatography (eluent = petroleum ether/EtOAc 64:1 v/v); ( $\text{PE}/\text{EA} = 64/1$ ,  $R_F \approx 0.44$ ).  **$^1\text{H}$  NMR (500 MHz,  $\text{CDCl}_3$ )**  $\delta = 7.60$  (d,  $J = 7.9$  Hz, 1H),  $7.35 - 7.28$  (m, 1H),  $7.19 - 7.15$  (m, 3H),  $7.15 - 7.10$  (m, 2H),  $7.09 - 7.04$  (m, 1H),  $6.95$  (d,  $J = 8.1$

Hz, 1H), 6.74 (d,  $J = 11.3$  Hz, 0H), 6.46 (d,  $J = 3.2$  Hz, 1H), 6.03 (d,  $J = 11.2$  Hz, 1H), 4.05 (t,  $J = 7.4$  Hz, 2H), 3.05 (s, 3H), 3.01 (s, 3H), 2.33 (t,  $J = 7.9$  Hz, 2H), 1.96 (s, 2H).  **$^{13}\text{C}$  NMR (126 MHz,  $\text{CDCl}_3$ )**  $\delta$  156.9, 142.5, 135.9, 132.1, 130.5, 130.4, 129.5, 129.4, 128.7, 127.7, 125.5, 124.5, 121.5, 121.0, 120.7, 119.3, 109.4, 101.3, 45.7, 38.4, 36.9, 29.0, 28.9. **HRMS (ESI-TOF):**  $m/z$  calculated for  $\text{C}_{23}\text{H}_{25}\text{N}_2\text{O}_3\text{S}$   $[\text{M}+\text{H}]^+$ : 409.1580, found: 409.1573.

***N*-(3-(3-(1*H*-pyrrol-1-yl)propyl)-7-bromobenzo[*b*]oxepin-2-yl)-*N*-methylethanesulfonamide (3bh)**

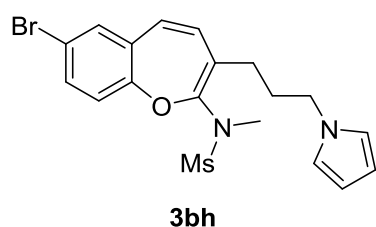

Following the general procedure B, the product **3bh** was obtained in 54% yield (47.1 mg) as a colourless liquid after column chromatography (eluent = petroleum ether/EtOAc 6:1 v/v); (PE/EA = 4/1,  $R_F \approx 0.24$ ).  **$^1\text{H}$  NMR (400 MHz,  $\text{CDCl}_3$ )**  $\delta$  = 7.40 (dd,  $J = 8.6, 2.4$  Hz, 1H), 7.28 (d,  $J = 2.4$  Hz, 1H), 6.84 (d,  $J = 8.5$  Hz, 1H), 6.64 (d,  $J = 11.4$  Hz, 1H), 6.60 (t,  $J = 2.1$  Hz, 2H), 6.11 (t,  $J = 2.1$  Hz, 2H), 6.06 (d,  $J = 11.2$  Hz, 1H), 3.84 (t,  $J = 7.1$  Hz, 2H), 3.12 (s, 3H), 3.03 (s, 3H), 2.28 – 2.21 (m, 2H), 1.87 (p,  $J = 7.5$  Hz, 2H).  **$^{13}\text{C}$  NMR (101 MHz,  $\text{CDCl}_3$ )**  $\delta$  155.8, 142.5, 133.0, 132.2, 131.9, 130.8, 130.6, 124.7, 122.4, 120.5, 118.2, 108.2, 49.2, 38.6, 37.0, 30.4, 28.9. **HRMS (ESI-TOF):**  $m/z$  calculated for  $\text{C}_{19}\text{H}_{22}\text{BrN}_2\text{O}_3\text{S}$   $[\text{M}+\text{H}]^+$ : 437.0529, found: 437.0533.

***N*-(7-Bromo-3-(3-cyanopropyl)benzo[*b*]oxepin-2-yl)-*N*-methylethanesulfonamide (3bi)**

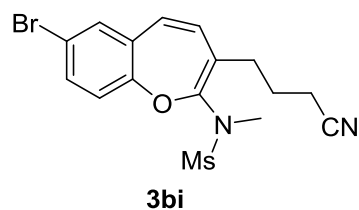

Following the general procedure B, the product **3bi** was obtained in 73% yield (57.8 mg) as a colourless liquid after column chromatography (eluent = petroleum ether/EtOAc 4:1 v/v); (PE/EA = 2/1,  $R_F \approx 0.40$ ).  **$^1\text{H}$  NMR (400 MHz,  $\text{CDCl}_3$ )**  $\delta$  = 7.41 (dd,  $J = 8.6, 2.5$  Hz, 1H), 7.29 (d,  $J = 2.4$  Hz, 1H), 6.84 (d,  $J = 8.7$  Hz, 1H), 6.67 (d,  $J = 11.2$  Hz, 1H), 6.09 (d,  $J = 11.2$  Hz, 1H), 3.17 (s, 3H), 3.09 (s, 3H), 2.42 (t,  $J = 7.9$  Hz, 2H), 2.30 (t,  $J = 7.2$  Hz, 2H), 1.79 (p,  $J = 7.3$  Hz,

2H). **<sup>13</sup>C NMR (101 MHz, CDCl<sub>3</sub>)** δ 155.8, 143.3, 133.2, 132.1, 132.0, 131.0, 130.2, 123.6, 122.4, 119.4, 118.4, 38.6, 37.0, 30.5, 24.2, 16.8. **HRMS (ESI-TOF):** *m/z* calculated for C<sub>16</sub>H<sub>18</sub>BrN<sub>2</sub>O<sub>3</sub>S [M+H]<sup>+</sup>: 397.0216, found: 397.0203.

***N*-(7-Bromo-3-phenethylbenzo[*b*]oxepin-2-yl)-*N*-methylmethanesulfonamide (3ba)**

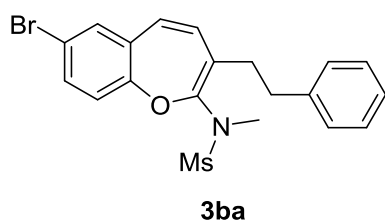

Following the general procedure B, the product **3ba** was obtained in 63% yield (54.6 mg) as a white solid after column chromatography (eluent = petroleum ether/EtOAc 6:1 v/v); (PE/EA = 4/1, *R<sub>F</sub>* ≈ 0.35). **<sup>1</sup>H NMR (400 MHz, CDCl<sub>3</sub>)** δ = 7.38 (dd, *J* = 8.6, 2.4 Hz, 1H), 7.33 (d, *J* = 2.4 Hz, 1H), 7.09 – 7.04 (m, 3H), 6.97 (dd, *J* = 6.6, 3.1 Hz, 2H), 6.76 – 6.68 (m, 2H), 6.18 (d, *J* = 11.4 Hz, 1H), 3.01 (s, 3H), 2.68 (s, 2H), 2.57 (s, 5H). **<sup>13</sup>C NMR (101 MHz, CDCl<sub>3</sub>)** δ 155.9, 143.1, 140.9, 132.8, 132.7, 131.6, 130.7, 128.9, 128.2, 126.1, 124.8, 122.3, 118.1, 38.4, 36.5, 34.7, 34.0. **HRMS (ESI-TOF):** *m/z* calculated for C<sub>20</sub>H<sub>21</sub>BrNO<sub>3</sub>S [M+H]<sup>+</sup>: 434.0420, found: 434.0419.

**2-(7-Bromo-2-(*N*-methylmethanesulfonamido)benzo[*b*]oxepin-3-yl)ethyl 4-(*N,N*-diethylsulfamoyl)benzoate (3bj)**

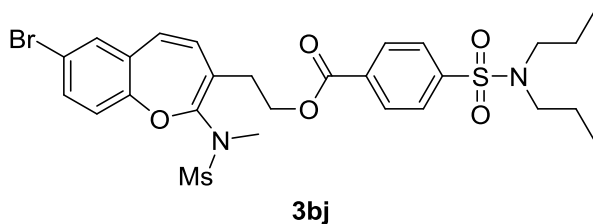

Following the general procedure B, the product **3bj** was obtained in 59% yield (75.5 mg) as a white solid after column chromatography (eluent = petroleum ether/EtOAc 3:1 v/v); (PE/EA = 2/1, *R<sub>F</sub>* ≈ 0.55). **<sup>1</sup>H NMR (500 MHz, CDCl<sub>3</sub>)** δ = 7.94 (d, *J* = 8.7 Hz, 2H), 7.80 (d, *J* = 8.6 Hz, 2H), 7.40 (dd, *J* = 8.7, 2.4 Hz, 1H), 7.21 (d, *J* = 2.4 Hz, 1H), 6.83 (d, *J* = 8.5 Hz, 1H), 6.64 (d, *J* = 11.3 Hz, 1H), 6.19 (d, *J* = 11.3 Hz, 1H), 4.39 (t, *J* = 6.9 Hz, 2H), 3.12 (s, 3H), 3.11 – 3.08 (m, 7H), 1.54 (h, *J* = 7.4 Hz, 4H), 0.86 (t, *J* = 7.4 Hz, 6H). **<sup>13</sup>C NMR (126 MHz, CDCl<sub>3</sub>)** δ 165.0, 155.8, 144.4, 144.1, 133.4, 133.1, 132.3, 130.8, 130.7, 130.2, 127.0, 122.3, 121.8, 118.4, 63.7, 50.0, 38.5, 37.0, 31.3, 22.0, 11.3. **HRMS (ESI-TOF):** *m/z*

calculated for  $C_{27}H_{34}BrN_2O_7S_2$   $[M+H]^+$ : 641.0985, found: 641.0962.

***N,N'*-(Butane-1,4-diylbis(7-bromobenzo[*b*]oxepine-3,2-diyl))bis(*N*-methylethanesulfonamide) (3bk)**

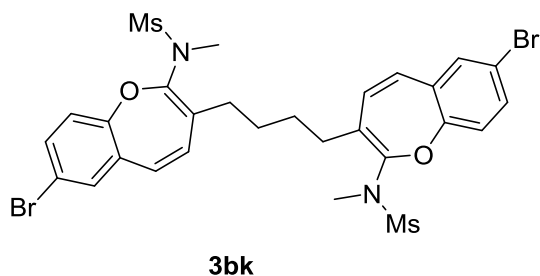

Following the general procedure B, the product **3bk** was obtained in 35% yield (49.8 mg) as a white solid after column chromatography (eluent = petroleum ether/EtOAc 3:1 v/v); (PE/EA = 2/1,  $R_F \approx$

0.33).  $^1H$  NMR (500 MHz,  $CDCl_3$ )  $\delta$  = 7.39 (dd,  $J$  = 8.5, 2.4 Hz, 2H), 7.25 (d,  $J$  = 2.4 Hz, 2H), 6.82 (d,  $J$  = 8.5 Hz, 2H), 6.59 (d,  $J$  = 11.3 Hz, 2H), 6.03 (d,  $J$  = 11.3 Hz, 2H), 3.08 (s, 6H), 3.06 (s, 6H), 2.29 – 2.18 (m, 4H), 1.26 (q,  $J$  = 3.7 Hz, 4H).  $^{13}C$  NMR (126 MHz,  $CDCl_3$ )  $\delta$  156.0, 142.3, 132.9, 132.4, 131.8, 131.3, 130.3, 125.6, 122.3, 118.1, 38.6, 37.2, 31.4, 28.1. HRMS (ESI-TOF):  $m/z$  calculated for  $C_{28}H_{30}Br_2N_2O_6S_2Na$   $[M+Na]^+$ : 734.9804, found: 734.9797.

**1-(3-Phenylbenzo[*b*]oxepin-2-yl)-1*H*-indole (3al)**

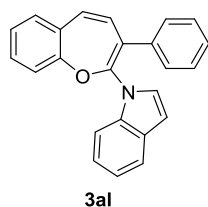

Following the general procedure B, the product **3al** was obtained in 37% yield (24.8 mg) as a pale yellow solid after column chromatography (eluent = petroleum ether/EtOAc 100:1 v/v); (PE/EA = 100/1,  $R_F \approx$  0.31).  $^1H$  NMR (500 MHz,  $CDCl_3$ )  $\delta$  = 7.66

(d,  $J$  = 8.2 Hz, 1H), 7.56 (d,  $J$  = 7.6 Hz, 1H), 7.41 (dd,  $J$  = 7.2, 2.3 Hz, 1H), 7.21 (tdd,  $J$  = 7.6, 6.6, 1.8 Hz, 3H), 7.18 – 7.12 (m, 4H), 7.10 (d,  $J$  = 11.1 Hz, 1H), 6.98 (dd,  $J$  = 6.7, 3.1 Hz, 2H), 6.80 – 6.74 (m, 2H), 6.53 (d,  $J$  = 11.3 Hz, 1H), 6.35 (d,  $J$  = 3.4 Hz, 1H).  $^{13}C$  NMR (126 MHz,  $CDCl_3$ )  $\delta$  154.5, 137.8, 137.0, 136.3, 130.7, 130.4, 130.3, 130.1, 129.0, 128.9, 128.7, 128.5, 127.5, 125.4, 122.9, 121.2, 121.1, 120.8, 118.9, 113.5, 104.5. HRMS (ESI-TOF):  $m/z$  calculated for  $C_{24}H_{18}NO$   $[M+H]^+$ : 336.1383, found: 336.1372.

**1-(2-phenylbenzo[*b*]oxepin-3-yl)-1*H*-indole (3al')**

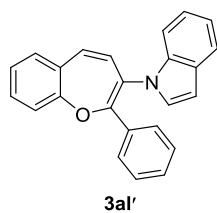

Following the general procedure B, the product **3al'** was obtained in 37% yield (24.8 mg) as a pale yellow solid after column chromatography (eluent = petroleum ether/EtOAc 100:1 v/v); (PE/EA = 100/1,  $R_F \approx 0.30$ ).  **$^1\text{H}$  NMR (500 MHz,  $\text{CDCl}_3$ )**  $\delta$  = 7.64 – 7.58 (m, 1H), 7.42 (dd,  $J$  = 7.7, 2.0 Hz, 1H), 7.33 (td,  $J$  = 7.6, 1.9 Hz, 1H), 7.27 – 7.18 (m, 2H), 7.17 (d,  $J$  = 7.1 Hz, 3H), 7.16 – 7.08 (m, 4H), 7.08 (d,  $J$  = 11.1 Hz, 1H), 7.00 (d,  $J$  = 8.1 Hz, 1H), 6.89 (d,  $J$  = 3.2 Hz, 1H), 6.54 (d,  $J$  = 3.4 Hz, 1H), 6.41 (d,  $J$  = 11.1 Hz, 1H).  **$^{13}\text{C}$  NMR (126 MHz,  $\text{CDCl}_3$ )**  $\delta$  155.1, 147.2, 136.0, 133.3, 132.0, 131.3, 131.2, 129.4, 129.2, 129.1, 128.8, 128.6, 128.2, 127.9, 126.1, 125.3, 122.3, 121.4, 120.9, 120.5, 111.4, 104.1. **HRMS (ESI-TOF):**  $m/z$  calculated for  $\text{C}_{24}\text{H}_{18}\text{NO}$   $[\text{M}+\text{H}]^+$ : 336.1383, found: 336.1375.

#### ***N*-Methyl-*N*-(3-(thiophen-2-yl)benzo[*b*]oxepin-2-yl)methanesulfonamide (3am)**

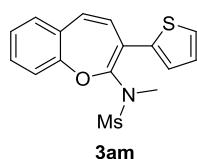

Following the general procedure B, the product **3am** was obtained in 43% yield (28.6 mg) as a pale yellow solid after column chromatography (eluent = petroleum ether/EtOAc 6:1 v/v); (PE/EA = 4/1,  $R_F \approx 0.27$ ).  **$^1\text{H}$  NMR (500 MHz,  $\text{CDCl}_3$ )**  $\delta$  = 7.40 (td,  $J$  = 7.6, 1.8 Hz, 1H), 7.36 (d,  $J$  = 5.0 Hz, 1H), 7.34 – 7.29 (m, 1H), 7.25 – 7.22 (m, 2H), 7.12 (d,  $J$  = 8.1 Hz, 1H), 7.05 (dd,  $J$  = 5.2, 3.7 Hz, 1H), 6.99 (d,  $J$  = 11.3 Hz, 1H), 6.58 (d,  $J$  = 11.3 Hz, 1H), 3.20 (s, 3H), 3.16 (s, 3H).  **$^{13}\text{C}$  NMR (126 MHz,  $\text{CDCl}_3$ )**  $\delta$  156.6, 141.4, 137.5, 131.8, 130.6, 130.1, 129.3, 128.6, 127.7, 127.1, 126.9, 125.6, 120.7, 119.4, 39.6, 36.7. **HRMS (ESI-TOF):**  $m/z$  calculated for  $\text{C}_{16}\text{H}_{16}\text{NO}_3\text{S}_2$   $[\text{M}+\text{H}]^+$ : 334.0556, found: 334.0560.

#### ***N*-methyl-*N*-(2-(thiophen-2-yl)benzo[*b*]oxepin-3-yl)methanesulfonamide (3am')**

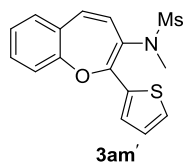

Following the general procedure B, the product **3am'** was obtained in 22% yield (14.7 mg) as a yellow solid after column chromatography (eluent = petroleum ether/EtOAc 6:1 v/v); (PE/EA = 4/1,  $R_F \approx 0.17$ ).  **$^1\text{H}$  NMR (500 MHz,  $\text{CDCl}_3$ )**  $\delta$  = 7.87 (dd,  $J$  = 3.8, 1.4 Hz, 1H), 7.42 (dd,  $J$  = 5.2, 1.4 Hz, 1H), 7.34 (td,  $J$  = 7.6, 1.8 Hz, 1H), 7.24 (d,  $J$  = 7.6 Hz, 1H), 7.20 – 7.08 (m, 3H),



6.89 (d,  $J = 11.4$  Hz, 1H), 6.35 (d,  $J = 11.4$  Hz, 1H), 3.12 (s, 3H), 2.94 (s, 3H).  **$^{13}\text{C}$  NMR (126 MHz,  $\text{CDCl}_3$ )**  $\delta$  155.0, 149.8, 135.7, 131.6, 131.2, 131.0, 129.5, 129.4, 129.1, 127.3, 126.3, 125.6, 124.2, 121.4, 38.2, 35.6. **HRMS (ESI-TOF):**  $m/z$  calculated for  $\text{C}_{16}\text{H}_{16}\text{NO}_3\text{S}_2$   $[\text{M}+\text{H}]^+$ : 334.0556, found: 334.0561.

***N*-Methyl-*N*-(3-phenylbenzo[*b*]oxepin-2-yl)methanesulfonamide (3an)**

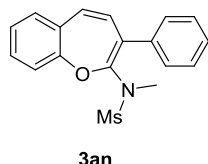

Following the general procedure B, the product **3an** was obtained in 60% yield (39.3 mg) as a white solid after column chromatography (eluent = petroleum ether/EtOAc 4:1 v/v); (PE/EA = 3/1,  $R_F \approx 0.47$ ).

**$^1\text{H}$  NMR (400 MHz,  $\text{CDCl}_3$ )**  $\delta$  = 7.41 – 7.33 (m, 5H), 7.32 – 7.25 (m, 2H), 7.21 (td,  $J = 7.4, 1.2$  Hz, 1H), 7.07 (dd,  $J = 8.1, 1.3$  Hz, 1H), 6.90 (d,  $J = 11.3$  Hz, 1H), 6.26 (d,  $J = 11.1$  Hz, 1H), 3.01 (s, 3H), 2.70 (s, 3H).  **$^{13}\text{C}$  NMR (101 MHz,  $\text{CDCl}_3$ )**  $\delta$  155.4, 140.6, 137.2, 131.3, 130.7, 130.3, 129.8, 129.2, 129.0, 128.6, 127.9, 125.4, 124.7, 120.9, 39.8, 36.8. **HRMS (ESI-TOF):**  $m/z$  calculated for  $\text{C}_{18}\text{H}_{18}\text{NO}_3\text{S}$   $[\text{M}+\text{H}]^+$ : 328.1002, found: 328.1000.

***N*-Methyl-*N*-(2-phenylbenzo[*b*]oxepin-3-yl)methanesulfonamide (3an')**

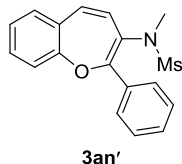

Following the general procedure B, the product **3an'** was obtained in 20% yield (13.1 mg) as a white solid after column chromatography (eluent = petroleum ether/EtOAc 4:1 v/v); (PE/EA = 3/1,  $R_F \approx 0.31$ ).

**$^1\text{H}$  NMR (400 MHz,  $\text{CDCl}_3$ )**  $\delta$  = 7.89 – 7.82 (m, 2H), 7.46 – 7.35 (m, 3H), 7.26 (d,  $J = 14.3$  Hz, 2H), 7.15 (td,  $J = 7.2, 1.3$  Hz, 1H), 6.97 (d,  $J = 11.4$  Hz, 1H), 6.90 – 6.85 (m, 1H), 6.34 (d,  $J = 11.3$  Hz, 1H), 3.03 (s, 3H), 2.67 (s, 3H).  **$^{13}\text{C}$  NMR (101 MHz,  $\text{CDCl}_3$ )**  $\delta$  155.1, 152.7, 134.0, 132.6, 131.0, 130.9, 129.7, 128.7, 128.5, 128.5, 127.9, 127.7, 125.3, 121.3, 39.3, 37.2. **HRMS (ESI-TOF):**  $m/z$  calculated for  $\text{C}_{18}\text{H}_{18}\text{NO}_3\text{S}$   $[\text{M}+\text{H}]^+$ : 328.1002, found: 328.1028.

**3-(3-Phenylbenzo[*b*]oxepin-2-yl)oxazolidin-2-one (3ao)**

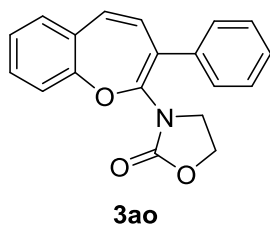

Following the general procedure B, the product **3ao** was obtained in 18% yield (11.0 mg) as a colourless liquid after column chromatography (eluent = petroleum ether/EtOAc 6:1 v/v); (PE/EA = 2/1,  $R_F \approx 0.34$ ).  $^1\text{H NMR}$  (500 MHz,  $\text{CDCl}_3$ )  $\delta$  = 7.41 – 7.32 (m, 3H), 7.32 – 7.27 (m, 4H), 7.21 (t,  $J$  = 7.5 Hz, 1H), 7.11 (d,  $J$  = 8.1 Hz, 1H), 6.90 (d,  $J$  = 11.3 Hz, 1H), 6.31 (d,  $J$  = 11.3 Hz, 1H), 4.26 (t,  $J$  = 7.9 Hz, 2H), 3.63 (t,  $J$  = 7.9 Hz, 2H).  $^{13}\text{C NMR}$  (126 MHz,  $\text{CDCl}_3$ )  $\delta$  155.5, 155.4, 138.0, 136.9, 131.2, 130.8, 130.4, 129.8, 129.1, 128.8, 128.3, 128.0, 125.5, 123.1, 121.2, 62.7, 45.4. **HRMS (ESI-TOF):**  $m/z$  calculated for  $\text{C}_{19}\text{H}_{16}\text{NO}_3$   $[\text{M}+\text{H}]^+$ : 306.1125, found: 306.1127.

### 3-(2-Phenylbenzo[b]oxepin-3-yl)oxazolidin-2-one (3ao')

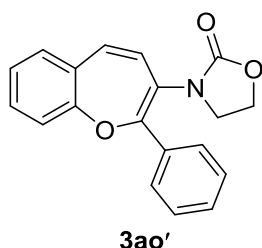

Following the general procedure B, the product **3ao'** was obtained in 48% yield (29.0 mg) as a pale yellow solid after column chromatography (eluent = petroleum ether/EtOAc 6:1 v/v); (PE/EA = 2/1,  $R_F \approx 0.30$ ).  $^1\text{H NMR}$  (500 MHz,  $\text{CDCl}_3$ )  $\delta$  = 7.74 (dd,  $J$  = 8.1, 1.7 Hz, 2H), 7.45 – 7.34 (m, 3H), 7.28 (td,  $J$  = 7.2, 6.7, 1.9 Hz, 1H), 7.24 (dd,  $J$  = 7.8, 1.8 Hz, 1H), 7.15 (td,  $J$  = 7.4, 1.1 Hz, 1H), 6.98 (d,  $J$  = 11.3 Hz, 1H), 6.86 (d,  $J$  = 8.1 Hz, 1H), 6.28 (d,  $J$  = 11.3 Hz, 1H), 4.30 – 4.23 (m, 2H), 3.55 – 3.48 (m, 2H).  $^{13}\text{C NMR}$  (126 MHz,  $\text{CDCl}_3$ )  $\delta$  157.0, 154.9, 149.0, 134.0, 132.4, 131.0, 131.0, 129.7, 129.0, 128.6, 128.1, 127.6, 125.2, 124.4, 121.0, 77.2, 62.6, 45.8. **HRMS (ESI-TOF):**  $m/z$  calculated for  $\text{C}_{19}\text{H}_{16}\text{NO}_3$   $[\text{M}+\text{H}]^+$ : 306.1125, found: 306.1123.

### 1-(3-Hexylbenzo[b]oxepin-2-yl)-1H-indole (3ap)

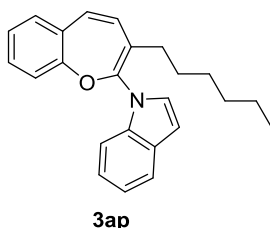

Following the general procedure B, the product **3ap** was obtained in 62% yield (42.6 mg) as a colourless liquid after column chromatography (eluent = petroleum ether/EtOAc 32:1 v/v); (PE/EA = 16/1,  $R_F \approx 0.50$ ).  $^1\text{H NMR}$  (400 MHz,  $\text{CDCl}_3$ )

$\delta$  = 7.64 (dd,  $J$  = 6.9, 1.7 Hz, 1H), 7.34 (d,  $J$  = 8.1 Hz, 1H), 7.25 – 7.20 (m, 2H), 7.19 – 7.13 (m, 4H), 6.92 (d,  $J$  = 11.2 Hz, 1H), 6.74 (dd,  $J$  = 7.9, 1.4 Hz, 1H), 6.58 (d,  $J$  = 3.3 Hz, 1H), 6.31 (d,  $J$  = 11.2 Hz, 1H), 2.03 – 1.91 (m, 2H), 1.23 – 1.01 (m, 7H), 0.77 (t,  $J$  = 7.1 Hz, 4H).  **$^{13}\text{C}$  NMR (101 MHz,  $\text{CDCl}_3$ )**  $\delta$  155.7, 138.8, 136.9, 131.0, 130.5, 130.5, 129.8, 128.8, 128.5, 128.4, 125.1, 122.6, 121.7, 121.2, 120.9, 120.8, 111.9, 103.7, 31.5, 30.6, 28.9, 28.9, 22.6, 14.1. **HRMS (ESI-TOF):**  $m/z$  calculated for  $\text{C}_{26}\text{H}_{26}\text{NO}$   $[\text{M}+\text{H}]^+$ : 344.2009, found: 344.2001.

***N*,4-Dimethyl-*N*-(3-pentylbenzo[*b*]oxepin-2-yl)benzenesulfonamide (3aq)**

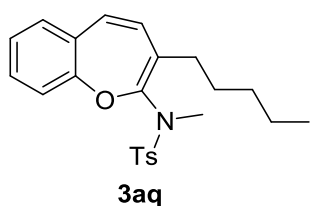

Following the general procedure B, the product **3aq** was obtained in 38% yield (30.2 mg) as a colourless liquid after column chromatography (eluent = petroleum ether/EtOAc 8:1 v/v); (PE/EA = 4/1,  $R_F \approx 0.49$ ).  **$^1\text{H}$  NMR (400 MHz,  $\text{CDCl}_3$ )**  $\delta$  = 7.83 (d,  $J$  = 8.4 Hz, 2H), 7.31 (d,  $J$  = 8.0 Hz, 2H), 7.16 – 7.00 (m, 3H), 6.71 (d,  $J$  = 11.2 Hz, 1H), 6.31 (dd,  $J$  = 8.1, 1.9 Hz, 1H), 6.13 (d,  $J$  = 11.4 Hz, 1H), 3.02 (s, 3H), 2.45 (s, 3H), 2.29 (s, 2H), 1.42 (s, 2H), 1.35 – 1.20 (m, 4H), 0.86 (t,  $J$  = 7.0 Hz, 3H).  **$^{13}\text{C}$  NMR (101 MHz,  $\text{CDCl}_3$ )**  $\delta$  156.9, 143.8, 141.5, 135.8, 131.2, 130.5, 130.2, 129.9, 129.6, 129.0, 128.6, 126.0, 124.9, 120.7, 37.2, 31.8, 31.7, 28.3, 22.6, 21.8, 14.1. **HRMS (ESI-TOF):**  $m/z$  calculated for  $\text{C}_{23}\text{H}_{28}\text{NO}_3\text{S}$   $[\text{M}+\text{H}]^+$ : 398.1784, found: 398.1788.

***N*-(7-Bromo-3-(3-chloropropyl)benzo[*b*]oxepin-2-yl)-*N*-methylmethanesulfonamide (3bc)**

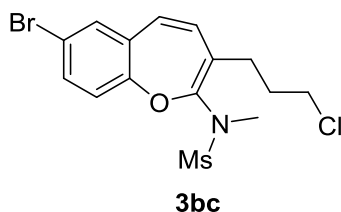

Following the general procedure B, the product **3bc** was obtained in 82% yield (66.4 mg) as a pale yellow liquid after column chromatography (eluent = petroleum ether/EtOAc 6:1 v/v); (PE/EA = 4/1,  $R_F \approx 0.29$ ).  **$^1\text{H}$  NMR (500 MHz,  $\text{CDCl}_3$ )**  $\delta$  = 7.40 (dd,  $J$  = 8.5, 3.1 Hz, 1H), 7.27 (d,  $J$  = 2.7 Hz, 1H), 6.84 (d,  $J$  = 8.6 Hz, 1H), 6.65 (d,  $J$  = 11.3 Hz, 1H), 6.11 (d,  $J$  = 11.4 Hz, 1H), 3.46 (t,  $J$  = 6.4 Hz, 2H), 3.16 (s, 3H), 3.08 (s, 3H), 2.43 (s, 2H), 1.87 (p,  $J$  = 6.9 Hz, 2H).  **$^{13}\text{C}$**

**NMR (126 MHz, CDCl<sub>3</sub>)**  $\delta$  155.9, 142.9, 133.1, 132.3, 131.9, 130.8, 130.7, 124.4, 122.3, 118.2, 44.4, 38.6, 37.1, 31.3, 28.9. **HRMS (ESI-TOF):**  $m/z$  calculated for C<sub>15</sub>H<sub>18</sub>BrClNO<sub>3</sub>S [M+H]<sup>+</sup>: 405.9874, found: 405.9894.

***N*-(7-Chloro-3-(3-chloropropyl)benzo[*b*]oxepin-2-yl)-*N*-methylmethanesulfonamide (3cc)**

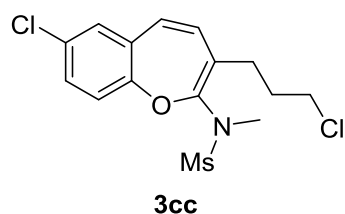

Following the general procedure B, the product **3cc** was obtained in 58% yield (41.9 mg) as a colourless liquid after column chromatography (eluent = petroleum ether/EtOAc 6:1 v/v); (PE/EA = 4/1,  $R_F \approx 0.22$ ). **<sup>1</sup>H**

**NMR (400 MHz, CDCl<sub>3</sub>)**  $\delta$  = 7.25 (dd,  $J$  = 8.7, 2.6 Hz, 1H), 7.12 (d,  $J$  = 2.6 Hz, 1H), 6.90 (d,  $J$  = 8.5 Hz, 1H), 6.65 (d,  $J$  = 11.4 Hz, 1H), 6.11 (d,  $J$  = 11.4 Hz, 1H), 3.46 (t,  $J$  = 6.4 Hz, 2H), 3.17 (s, 3H), 3.09 (s, 3H), 2.46 (d,  $J$  = 21.0 Hz, 2H), 1.88 (p,  $J$  = 6.9 Hz, 2H). **<sup>13</sup>C NMR (126 MHz, Acetone-*d*<sub>6</sub>)**  $\delta$  156.8, 144.5, 133.5, 132.2, 131.7, 131.3, 131.2, 129.8, 125.3, 124.0, 45.7, 39.4, 37.9, 32.6, 30.0. **HRMS (ESI-TOF):**  $m/z$  calculated for C<sub>15</sub>H<sub>18</sub>Cl<sub>2</sub>NO<sub>3</sub>S [M+H]<sup>+</sup>: 362.0379, found: 362.0386.

***N*-(3-(3-Chloropropyl)-7-fluorobenzo[*b*]oxepin-2-yl)-*N*-methylmethanesulfonamide (3dc)**

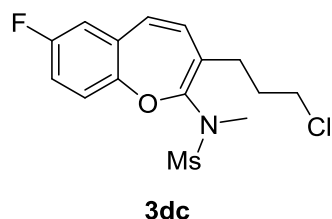

Following the general procedure B, the product **3dc** was obtained in 44% yield (30.3 mg) as a white solid after column chromatography (eluent = petroleum ether/EtOAc 6:1 v/v); (PE/EA = 4/1,  $R_F \approx 0.33$ ). **<sup>1</sup>H NMR (400 MHz,**

**CDCl<sub>3</sub>)**  $\delta$  = 6.99 (ddd,  $J$  = 8.8, 7.6, 3.0 Hz, 1H), 6.92 (dd,  $J$  = 8.8, 4.8 Hz, 1H), 6.84 (dd,  $J$  = 8.6, 3.0 Hz, 1H), 6.66 (d,  $J$  = 11.2 Hz, 1H), 6.12 (d,  $J$  = 11.2 Hz, 1H), 3.46 (t,  $J$  = 6.4 Hz, 2H), 3.18 (s, 3H), 3.09 (s, 3H), 2.43 (t,  $J$  = 7.8 Hz, 2H), 1.88 (p,  $J$  = 6.7 Hz, 2H). **<sup>19</sup>F NMR (376 MHz, CDCl<sub>3</sub>)**  $\delta$  -117.83. **<sup>13</sup>C NMR (101 MHz, CDCl<sub>3</sub>)**  $\delta$  = 159.8 (d,  $J$  = 243.9 Hz), 152.7 (d,  $J$  = 2.4 Hz), 143.1, 131.8 (d,  $J$  = 8.3 Hz), 130.9 (d,  $J$  = 2.0 Hz), 130.7, 124.2, 121.8 (d,  $J$  = 8.8 Hz), 116.8 (d,  $J$  = 23.7 Hz), 115.3 (d,  $J$  = 23.5 Hz), 44.4, 38.6, 37.1, 31.3, 28.9. **HRMS (ESI-TOF):**  $m/z$  calculated for

$C_{15}H_{17}ClFNO_3SNa$   $[M+Na]^+$ : 368.0494, found: 368.0474.

***N*-(3-(3-Chloropropyl)-7-methylbenzo[*b*]oxepin-2-yl)-*N*-methylethanesulfonamide (3ec)**

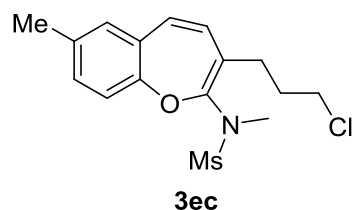

Following the general procedure B, the product **3ec** was obtained in 54% yield (36.8 mg) as a colourless liquid after column chromatography (eluent = petroleum ether/EtOAc 6:1 v/v); (PE/EA = 6/1,  $R_F \approx 0.26$ ).  $^1H$

**NMR (400 MHz,  $CDCl_3$ )**  $\delta$  = 7.09 (dd,  $J$  = 8.2 Hz, 2.4, 1H), 6.94 (d,  $J$  = 2.6 Hz, 1H), 6.84 (d,  $J$  = 8.2 Hz, 1H), 6.69 (d,  $J$  = 11.4 Hz, 1H), 6.05 (d,  $J$  = 11.4 Hz, 1H), 3.46 (t,  $J$  = 6.5 Hz, 2H), 3.17 (s, 3H), 3.10 (s, 3H), 2.43 (s, 2H), 2.31 (s, 3H), 1.88 (p,  $J$  = 7.7, 7.0 Hz, 2H).  $^{13}C$  **NMR (101 MHz,  $CDCl_3$ )**  $\delta$  154.9, 142.8, 135.0, 132.1, 131.0, 130.0, 129.8, 129.4, 124.2, 120.2, 44.5, 38.5, 37.1, 31.4, 29.0, 20.8. **H RMS (ESI-TOF):**  $m/z$  calculated for  $C_{16}H_{21}ClNO_3S$   $[M+H]^+$ : 342.0925, found: 342.0910.

***N*-(3-(3-Chloropropyl)-7-methoxybenzo[*b*]oxepin-2-yl)-*N*-methylethanesulfonamide (3fc)**

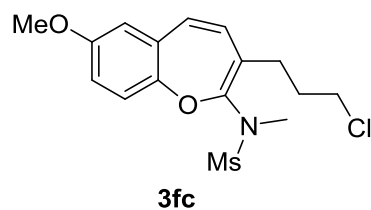

Following the general procedure B, the product **3fc** was obtained in 31% yield (22.1 mg) as a yellow liquid after column chromatography (eluent = petroleum ether/EtOAc 6:1 v/v); (PE/EA = 4/1,  $R_F \approx 0.24$ ).  $^1H$

**NMR (500 MHz,  $CDCl_3$ )**  $\delta$  6.88 (d,  $J$  = 8.8 Hz, 1H), 6.82 (dd,  $J$  = 8.9, 3.0 Hz, 1H), 6.69 (d,  $J$  = 11.3 Hz, 1H), 6.64 (d,  $J$  = 3.0 Hz, 1H), 6.08 (d,  $J$  = 11.3 Hz, 1H), 3.79 (s, 3H), 3.46 (t,  $J$  = 6.5 Hz, 2H), 3.18 (s, 3H), 3.09 (s, 3H), 2.43 (s, 2H), 1.89 (q,  $J$  = 7.1 Hz, 2H).  $^{13}C$  **NMR (126 MHz,  $CDCl_3$ )**  $\delta$  156.9, 150.7, 143.2, 131.8, 131.0, 129.9, 124.0, 121.2, 115.8, 113.5, 55.8, 44.5, 38.5, 37.2, 31.4, 29.0. **HRMS (ESI-TOF):**  $m/z$  calculated for  $C_{16}H_{21}ClNO_4S$   $[M+H]^+$ : 358.0874, found: 358.0875.

***N*-(3-(3-Chloropropyl)-8-methylbenzo[*b*]oxepin-2-yl)-*N*-methylethanesulfonamide (3gc)**

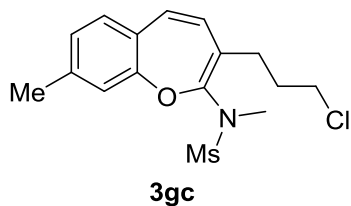

Following the general procedure B, the product **3gc** was obtained in 68% yield (46.4 mg) as a colourless liquid after column chromatography (eluent = petroleum ether/EtOAc 6:1 v/v); (PE/EA = 4/1,  $R_F \approx 0.35$ ).  **$^1\text{H}$  NMR (500 MHz,  $\text{CDCl}_3$ )**  $\delta$  = 7.02 (d,  $J$  = 7.6 Hz, 1H), 6.95 (dt,  $J$  = 7.8, 0.9 Hz, 1H), 6.76 (d,  $J$  = 1.7 Hz, 1H), 6.69 (d,  $J$  = 11.3 Hz, 1H), 6.00 (d,  $J$  = 11.3 Hz, 1H), 3.46 (t,  $J$  = 6.6 Hz, 2H), 3.18 (s, 3H), 3.11 (s, 3H), 2.51 – 2.36 (m, 2H), 2.34 (s, 3H), 1.92 – 1.85 (m, 2H).  **$^{13}\text{C}$  NMR (126 MHz,  $\text{CDCl}_3$ )**  $\delta$  156.9, 142.4, 141.1, 131.9, 129.2, 128.5, 127.5, 126.2, 124.3, 121.1, 44.5, 38.5, 37.2, 31.4, 29.0, 21.3. **HRMS (ESI-TOF):**  $m/z$  calculated for  $\text{C}_{16}\text{H}_{21}\text{ClINO}_3\text{S}$   $[\text{M}+\text{H}]^+$ : 342.0925, found: 342.0912.

***N*-(8-Bromo-3-(3-chloropropyl)benzo[*b*]oxepin-2-yl)-*N*-methylmethanesulfonamide (3hc)**

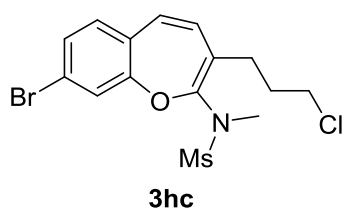

Following the general procedure B, the product **3hc** was obtained in 78% yield (63.2 mg) as a white solid after column chromatography (eluent = petroleum ether/EtOAc 6:1 v/v); (PE/EA = 6/1,  $R_F \approx 0.20$ ).  **$^1\text{H}$  NMR (400 MHz,  $\text{CDCl}_3$ )**  $\delta$  = 7.28 (ddd,  $J$  = 8.2, 2.0, 0.8 Hz, 1H), 7.12 (d,  $J$  = 2.1 Hz, 1H), 7.01 (d,  $J$  = 8.1 Hz, 1H), 6.67 (d,  $J$  = 11.4 Hz, 1H), 6.08 (d,  $J$  = 11.4 Hz, 1H), 3.46 (t,  $J$  = 6.2 Hz, 2H), 3.18 (s, 3H), 3.10 (s, 3H), 2.51 – 2.36 (m, 2H), 1.88 (p,  $J$  = 7.0 Hz, 2H).  **$^{13}\text{C}$  NMR (101 MHz,  $\text{CDCl}_3$ )**  $\delta$  157.2, 142.7, 131.1, 130.4, 130.0, 129.5, 128.7, 124.7, 124.0, 123.4, 44.4, 38.6, 37.2, 31.3, 29.0. **HRMS (ESI-TOF):**  $m/z$  calculated for  $\text{C}_{15}\text{H}_{18}\text{BrClINO}_3\text{S}$   $[\text{M}+\text{H}]^+$ : 405.9874, found: 405.9875.

***N*-(9-Bromo-3-(3-chloropropyl)benzo[*b*]oxepin-2-yl)-*N*-methylmethanesulfonamide (3ic)**

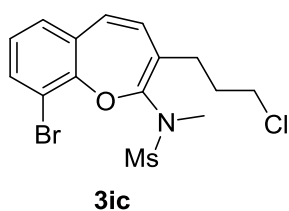

Following the general procedure B, the product **3ic** was obtained in 60% yield (48.6 mg) as a colourless liquid after column chromatography (eluent = petroleum ether/EtOAc 6:1 v/v); (PE/EA = 4/1,  $R_F \approx 0.42$ ).  **$^1\text{H}$  NMR (400 MHz,**

**CDCl<sub>3</sub>**)  $\delta$  = 7.52 (dd,  $J$  = 7.8, 1.7 Hz, 1H), 7.10 (dd,  $J$  = 7.6, 1.8 Hz, 1H), 7.01 (t,  $J$  = 7.8 Hz, 1H), 6.69 (d,  $J$  = 11.2 Hz, 1H), 6.10 (d,  $J$  = 11.2 Hz, 1H), 3.50 (td,  $J$  = 6.4, 1.7 Hz, 2H), 3.28 (s, 3H), 3.20 (s, 3H), 2.58 (ddd,  $J$  = 13.8, 9.4, 6.7 Hz, 1H), 2.31 (ddd,  $J$  = 14.2, 9.5, 5.1 Hz, 1H), 2.10 – 1.94 (m, 1H), 1.86 (ddt,  $J$  = 14.2, 9.4, 6.6 Hz, 1H). **<sup>13</sup>C NMR (101 MHz, CDCl<sub>3</sub>)**  $\delta$  154.3, 141.8, 134.1, 131.9, 131.7, 130.0, 129.1, 126.5, 126.2, 114.4, 44.5, 40.1, 38.2, 31.3, 29.3. **HRMS (ESI-TOF):**  $m/z$  calculated for C<sub>15</sub>H<sub>18</sub>BrClNO<sub>3</sub>S [M+H]<sup>+</sup>: 405.9874, found: 405.9894.

***N*-(3-(3-Chloropropyl)-7-nitrobenzo[*b*]oxepin-2-yl)-*N*-methylethanesulfonamide (3jc)**

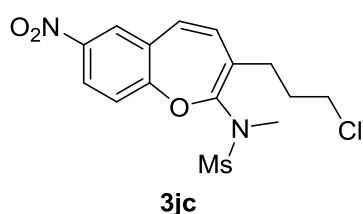

Following the general procedure B, the product **3jc** was obtained in 72% yield (53.6 mg) as a pale yellow solid after column chromatography (eluent = petroleum ether/EtOAc 4:1 v/v); (PE/EA = 3/1,  $R_F \approx 0.28$ ). **<sup>1</sup>H NMR (500 MHz, CDCl<sub>3</sub>)**  $\delta$  = 8.18 (dt,  $J$  = 8.9, 2.1 Hz, 1H), 8.05 (s, 1H), 7.10 (dd,  $J$  = 8.9, 1.1 Hz, 1H), 6.76 (d,  $J$  = 11.3 Hz, 1H), 6.21 (d,  $J$  = 11.3 Hz, 1H), 3.49 (t,  $J$  = 6.3 Hz, 2H), 3.19 (s, 3H), 3.11 (s, 3H), 2.45 (t,  $J$  = 7.8 Hz, 2H), 1.89 (p,  $J$  = 6.6 Hz, 2H). **<sup>13</sup>C NMR (126 MHz, CDCl<sub>3</sub>)**  $\delta$  161.3, 145.2, 142.4, 131.8, 131.3, 130.4, 125.6, 124.9, 124.8, 121.9, 44.4, 38.9, 37.0, 31.1, 29.0. **HRMS (ESI-TOF):**  $m/z$  calculated for C<sub>15</sub>H<sub>17</sub>ClN<sub>2</sub>O<sub>5</sub>SN<sub>a</sub> [M+Na]<sup>+</sup>: 395.0439, found: 395.0440.

***N*-(2,4-Dichloro-7-(3-chloropropyl)-5H-benzo[7]annulen-6-yl)-*N*-methylethanesulfonamide (3kc)**

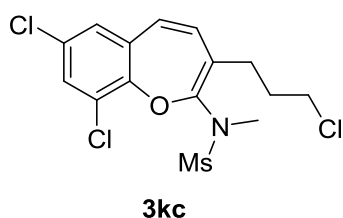

Following the general procedure B, the product **3kc** was obtained in 70% yield (55.3 mg) as a colourless liquid after column chromatography (eluent = petroleum ether/EtOAc 6:1 v/v); (PE/EA = 4/1,  $R_F \approx 0.44$ ). **<sup>1</sup>H NMR (400 MHz, CDCl<sub>3</sub>)**  $\delta$  = 7.37 (d,  $J$  = 2.6 Hz, 1H), 7.05 (d,  $J$  = 2.6 Hz, 1H), 6.63 (d,  $J$  = 11.4 Hz, 1H), 6.16 (d,  $J$  = 11.3 Hz, 1H), 3.50 (td,  $J$  = 6.5, 2.0 Hz, 2H), 3.23 (s, 3H), 3.15 (s, 3H), 2.56 (ddd,  $J$  = 13.8, 9.4, 6.7 Hz, 1H), 2.31 (ddd,  $J$  = 14.2, 9.5, 5.0

Hz, 1H), 2.00 (tt,  $J = 15.2, 6.1$  Hz, 1H), 1.91 – 1.78 (m, 1H).  $^{13}\text{C}$  NMR (101 MHz,  $\text{CDCl}_3$ )  $\delta$  151.6, 142.4, 132.6, 131.3, 130.6, 130.6, 130.3, 127.8, 126.36, 125.7, 44.4, 39.6, 37.8, 31.2, 29.2. HRMS (ESI-TOF):  $m/z$  calculated for  $\text{C}_{15}\text{H}_{17}\text{Cl}_3\text{NO}_3\text{S}$   $[\text{M}+\text{H}]^+$ : 395.9989, found: 395.9981.

## 5. Gram-scale synthesis of compound 3ba

4-Bromo-2-vinylphenol **1b** (6.0 mmol, 1.5 equiv),  $[\text{Cp}^*\text{Co}(\text{CO})\text{I}_2]$  (195 mg, 0.4 mmol, 10 mol %),  $\text{Cu}(\text{OAc})_2 \cdot \text{H}_2\text{O}$  (1.19 g, 6.0 mmol, 1.5 equiv),  $\text{Ag}_2\text{CO}_3$  (0.55g, 2.0 mmol, 0.5 equiv), DCE (20.0 mL) and ynamide **2a** (1.19 g, 4.0 mmol, 1.0 equiv) were added to a 75 mL Schlenk tube. The mixture was stirred at room temperature for 24 h under air, then the reaction mixture was filtered through celite and washed with ethyl acetate. The solvents were removed *in vacuo* and the remaining residue was purified by flash column chromatography on silica gel to afford the desired products **3ba** as a white solid in 66% yield (1.15 g).

## 6. Derivatization of product 3aa, 3ba, and 3ac

### Synthesis of 5

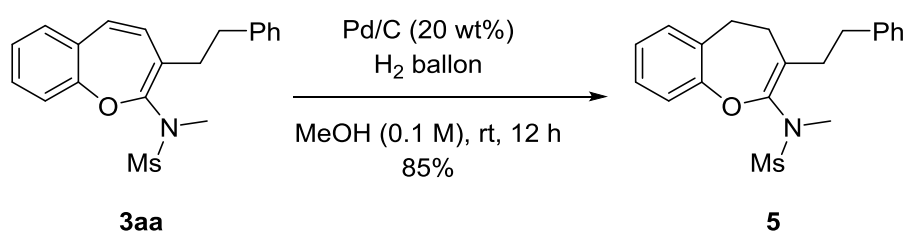

To a 15.0 mL tube charged with **3aa** (71.0 mg, 0.20 mmol), were added Pd/C (13 mg, 20 wt %) and MeOH (2.0 mL). The tube was evacuated and refilled with hydrogen balloon for three times. At room temperature, the suspension was stirred under hydrogen (approximately 1 atm) for 12 h and then filtered through a pad of Celite and concentrated. The residue was purified by flash column chromatography on silica gel (PE/EtOAc = 6/1; PE/EA = 6/1, RF = 0.4) to afford the product **5** (60.7 mg, 85%).



***N*-Methyl-*N*-(3-phenethyl-4,5-dihydrobenzo[*b*]oxepin-2-yl)methanesulfonamide**

**(5)**

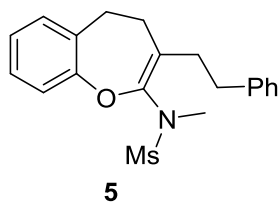

**<sup>1</sup>H NMR (400 MHz, CDCl<sub>3</sub>)**  $\delta$  = 7.22 – 7.09 (m, 5H), 7.13 – 7.03 (m, 3H), 6.94 (d, *J* = 8.0 Hz, 1H), 3.20 (brs, 1H), 3.03 (s, 3H), 2.81 (s, 7H), 2.52 (brs, 3H). **<sup>13</sup>C NMR (101 MHz, CDCl<sub>3</sub>)**  $\delta$  157.4, 142.8, 141.8, 134.0, 129.6, 128.7, 128.4,

127.4, 125.9, 124.8, 121.8, 119.6, 37.9, 36.3, 35.8, 34.0, 31.1, 29.5. **HRMS (ESI-TOF):** *m/z* calculated for C<sub>20</sub>H<sub>24</sub>NO<sub>3</sub>S [M+H]<sup>+</sup>: 358.1471, found: 358.1487.

**Synthesis of 6**

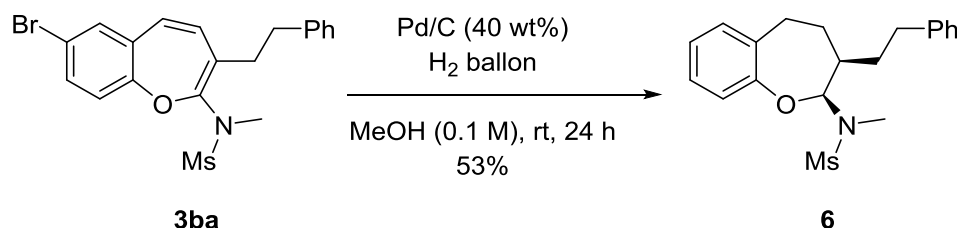

To a 15.0 mL tube charged with **3ba** (86.9.0 mg, 0.20 mmol), were added Pd/C (26 mg, 40 wt %) and MeOH (2.0 mL). The tube was evacuated and refilled with hydrogen balloon for three times. At room temperature, the suspension was stirred under hydrogen (approximately 1 atm) for 24 h and then filtered through a pad of Celite and concentrated. The residue was purified by flash column chromatography on silica gel (PE/EtOAc = 6/1; PE/EA = 6/1, RF = 0.4) to afford the product **6** (38.1 mg, 53%).

***N*-Methyl-*N*-(3-phenethyl-2,3,4,5-tetrahydrobenzo[*b*]oxepin-2-yl)methanesulfonamide (**6**)**

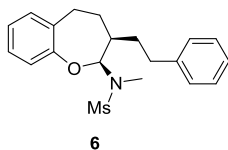

**<sup>1</sup>H NMR (500 MHz, CDCl<sub>3</sub>)**  $\delta$  = 7.25 – 7.22 (m, 2H), 7.17 (t, *J* = 7.3 Hz, 1H), 7.09 (d, *J* = 8.1 Hz, 2H), 7.06 (d, *J* = 7.5 Hz, 1H), 7.01 (dd, *J* = 7.5, 1.5 Hz, 1H), 6.82 (t, *J* = 7.4 Hz, 1H), 6.76 (d, *J* = 8.1 Hz, 1H), 5.52 (s, 1H), 3.17 (s, 3H), 2.97 (s, 3H), 2.77 (dp, *J* = 10.5, 5.6 Hz, 1H),

2.64 (tdd,  $J = 7.9, 5.6, 2.4$  Hz, 3H), 2.56 (ddd,  $J = 13.6, 8.7, 5.3$ , 1H), 2.00 (dq,  $J = 15.0, 7.3, 6.7$  Hz, 2H), 1.88 (dq,  $J = 13.7, 7.3, 6.7$  Hz, 2H).  **$^{13}\text{C}$  NMR (126 MHz,  $\text{CDCl}_3$ )**  $\delta$  177.6, 153.8, 140.9, 130.2, 128.5, 128.5, 127.7, 127.1, 126.2, 120.7, 115.6, 42.6, 41.8, 33.4, 33.1, 32.1, 31.6, 27.7. **HRMS (ESI-TOF):**  $m/z$  calculated for  $\text{C}_{20}\text{H}_{25}\text{NO}_3\text{SK}$   $[\text{M}+\text{K}]^+$ : 398.1187, found: 398.1193.

### Synthesis of 7

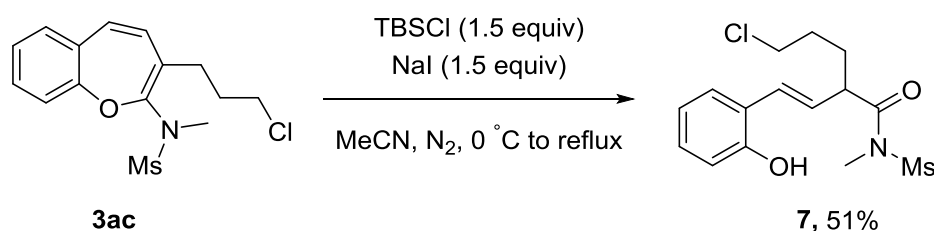

To a suspension of sodium iodide (0.6 mmol) in acetonitrile (4 mL), chlorotrimethylsilane (0.6 mmol) was added dropwise and stirred for 10 min at 0 °C under a  $\text{N}_2$  atmosphere. To this suspension, a solution of **3ac** (0.4 mmol) in acetonitrile (2 mL) was added and refluxed for 6 hrs under a  $\text{N}_2$  atmosphere. The reaction mixture was quenched with water and extracted with ethylacetate (15 mL). The organic layer was washed with 10% sodium thiosulphate solution, brine, dried over anhydrous  $\text{Na}_2\text{SO}_4$  and concentrated under vacuum to give the crude product. This was purified by column chromatography to afford **7** as a colorless liquid (70.4 mg, 51%).

### (*E*)-5-Chloro-2-(2-hydroxystyryl)-*N*-methyl-*N*-(methylsulfonyl)pentanamide (**7**)

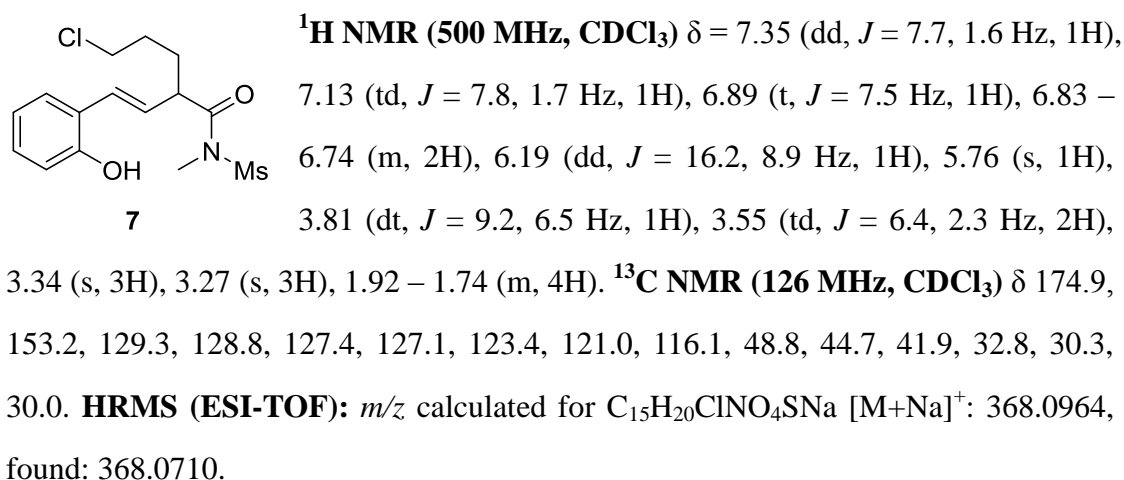

## 7. Mechanistic studies

### 7.1 Intermolecular competition experiments

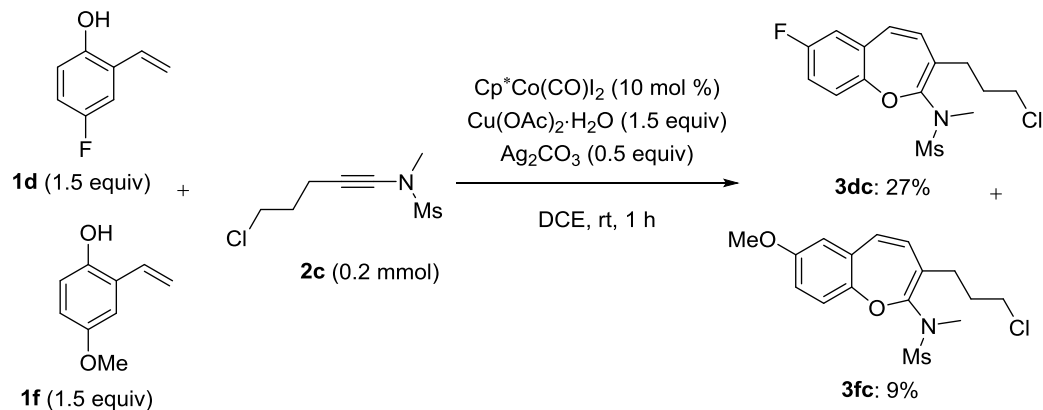

To a solution of  $[\text{Cp}^*\text{Co}(\text{CO})\text{I}_2]$  (9.8 mg, 0.02 mmol, 10 mol %),  $\text{Cu}(\text{OAc})_2 \cdot \text{H}_2\text{O}$  (60.0 mg, 0.30 mmol, 1.5 equiv),  $\text{Ag}_2\text{CO}_3$  (0.55g, 0.10 mmol, 0.5 equiv), and ynamide **2c** (0.20 mmol) in DCE (1.0 mL) under air atmosphere was added a solution of **1d** and **1f** (0.30 mmol each). The mixture was stirred at 25 °C for 1 h under air. Then, the mixture was diluted with  $\text{CH}_2\text{Cl}_2$  (10 mL). The mixture was filtered through a Celite pad and the Celite pad was washed with  $\text{CH}_2\text{Cl}_2$  ( $3 \times 10$  mL). The filtrate was concentrated under reduced pressure and the crude mixture was analyzed by  $^1\text{H}$  NMR. The yield of **3dc** and **3fc** was 27% and 9%, respectively.

### 7.2 H/D scrambling experiment

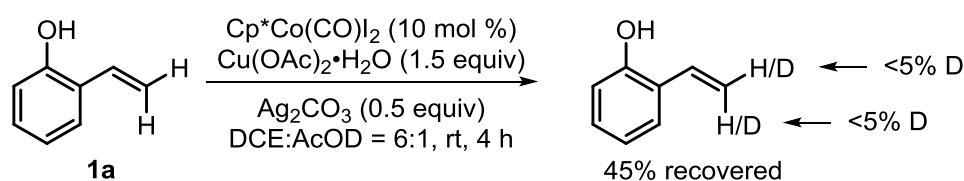

To a solution of  $\text{Cp}^*\text{Co}(\text{CO})\text{I}_2$  (10 mg, 10 mol%),  $\text{Cu}(\text{OAc})_2 \cdot \text{H}_2\text{O}$  (60 mg, 1.5 equiv) and  $\text{Ag}_2\text{CO}_3$  (28 mg, 0.5 equiv) in DCE (0.86 mL) under air atmosphere was added 2-vinylphenol **1a** (36 mg, 1.5 equiv) and AcOD (0.14 mL). After stirring for 4 h at room temperature, the solvents were removed in vacuo and the remaining residue was purified by flash column chromatography on silica gel to give **1a** and **1a-dn** (16.2

mg, 45% recovery). No deuterationon were observed for both olefinic protons based on  $^1\text{H}$ -NMR.

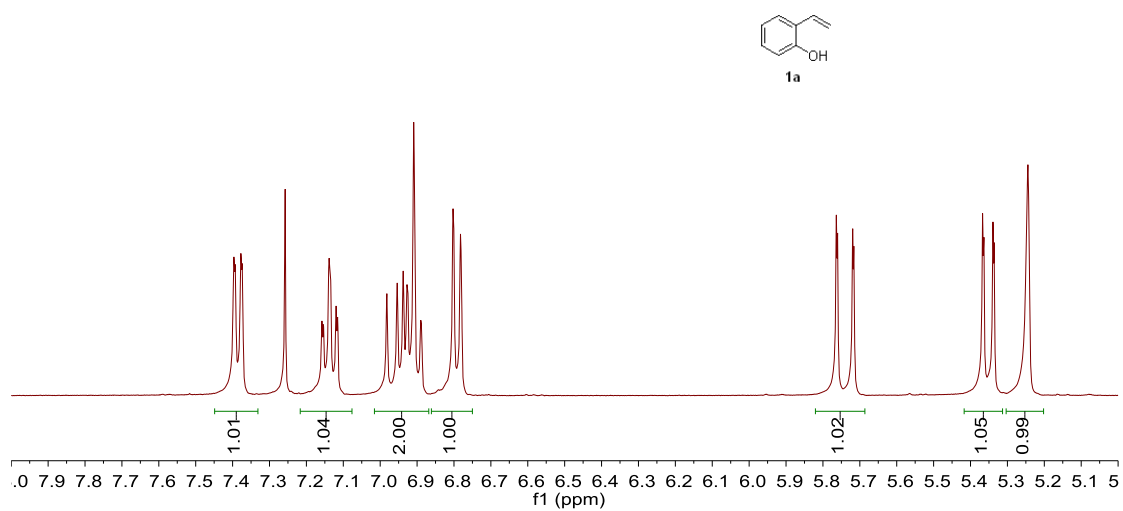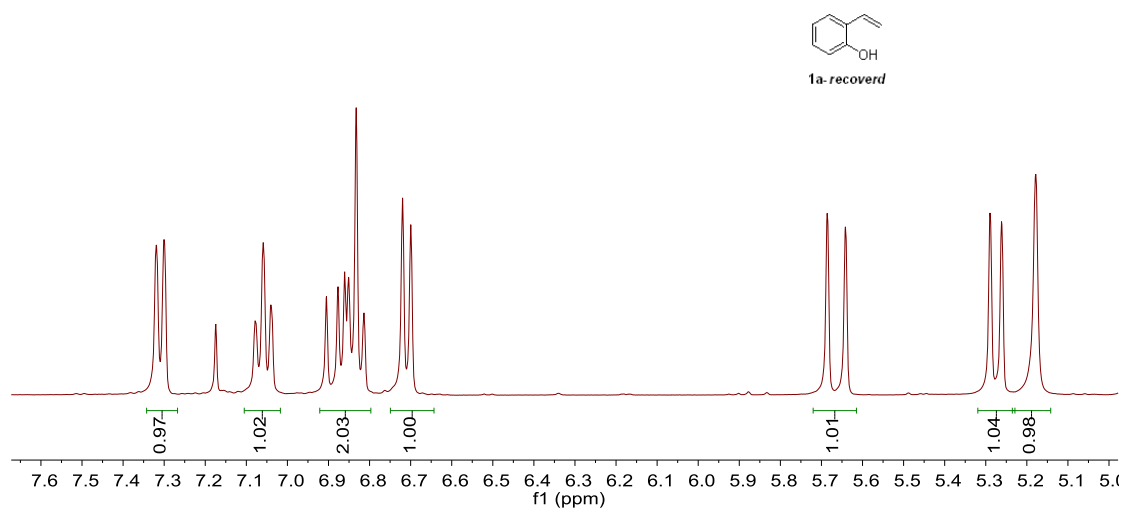

### 7.3 Kinetic isotopic effect

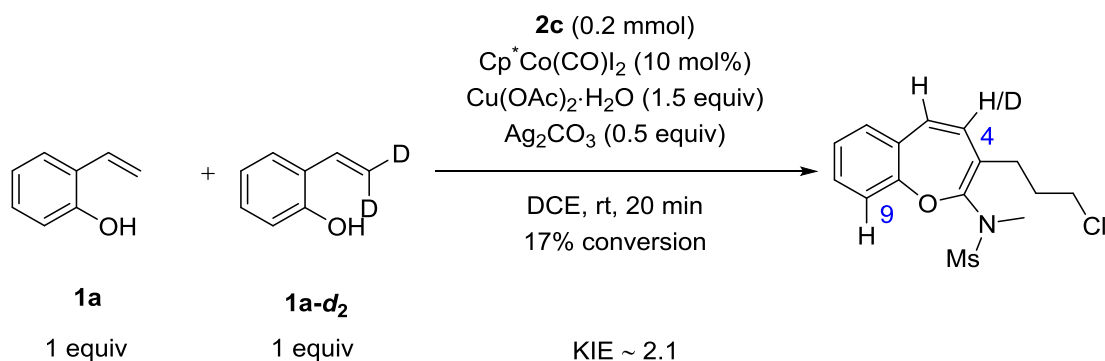

To a solution of  $[\text{Cp}^*\text{Co}(\text{CO})\text{I}_2]$  (9.8 mg, 0.02 mmol, 10 mol %) and  $\text{Cu}(\text{OAc})_2 \cdot \text{H}_2\text{O}$  (60 mg, 0.30 mmol, 1.5 equiv),  $\text{Ag}_2\text{CO}_3$  (28 mg, 0.10 mmol, 0.5 equiv) and **2c** (41.8 mg, 0.20 mmol) in DCE (1 mL) under air atmosphere was added a equimolar solution of **1a** and **1a-d<sub>2</sub>** (0.20 mmol each). This solution was prepared by mixing 21.3 mg of **1a** and 27.1 mg of **1a-d<sub>2</sub>** (90% deuterated). The mixture stirred at room temperature for 20 min under air. After 20 minutes the reaction mixture was diluted with DCM (10 mL) and filtered through silica (washing with ethyl acetate). The solvents were evaporated in vacuo and the remaining residue was purified by flash column chromatography on silica to remove the remaining starting material. The residue was analysed by  $^1\text{H}$ NMR. The KIE value ( $\sim 2.1$ ) was obtained by integrating the  $\text{H}_4$  of the 1-benzoxepine **3ac** and the  $\text{H}_9$  of the 1-benzoxepine **3ac** and **3ac-d**.

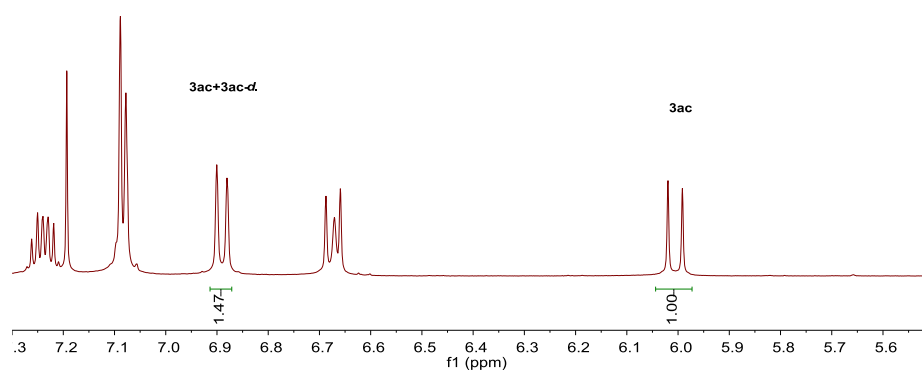

## 8. X-ray data for compounds 3aa and 3jc

### 8.1 X-ray data for compound 3aa

Single crystals of  $C_{20}H_{21}NO_3S$  [hxl\_180125] were colourless block. A suitable crystal was selected and on a **Xcalibur, Onyx, Nova** diffractometer. The crystal was kept at 100 K during data collection. Using Olex2 [1], the structure was solved with the ShelXS [2] structure solution program using Direct Methods and refined with the ShelXL [3] refinement package using Least Squares minimisation.

Crystal Data for  $C_{20}H_{21}NO_3S$  ( $M = 355.44$  g/mol): monoclinic, space group P21/c (no. 14),  $a = 13.5862(3)$  Å,  $b = 9.9930(2)$  Å,  $c = 13.1956(3)$  Å,  $\beta = 94.489(2)^\circ$ ,  $V = 1786.03(7)$  Å<sup>3</sup>,  $Z = 4$ ,  $T = 100$  K,  $\mu(\text{CuK}\alpha) = 1.762$  mm<sup>-1</sup>,  $D_{\text{calc}} = 1.322$  g/cm<sup>3</sup>, 6433 reflections measured ( $6.526^\circ \leq 2\theta \leq 134.16^\circ$ ), 3164 unique ( $R_{\text{int}} = 0.0200$ ,  $R_{\text{sigma}} = 0.0232$ ) which were used in all calculations. The final  $R_1$  was 0.0343 ( $I > 2\sigma(I)$ ) and  $wR_2$  was 0.0933 (all data).

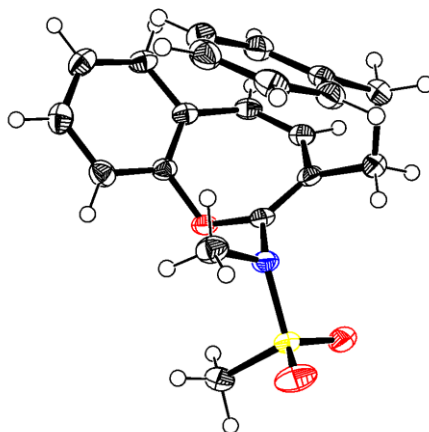

**Table 1** Crystal data and structure refinement for hxl\_180125.

|                     |                     |
|---------------------|---------------------|
| Identification code | hxl_180125          |
| Empirical formula   | $C_{20}H_{21}NO_3S$ |
| Formula weight      | 355.44              |

|                                                |                                                                |
|------------------------------------------------|----------------------------------------------------------------|
| Temperature/K                                  | 100                                                            |
| Crystal system                                 | monoclinic                                                     |
| Space group                                    | P2 <sub>1</sub> /c                                             |
| a/Å                                            | 13.5862(3)                                                     |
| b/Å                                            | 9.9930(2)                                                      |
| c/Å                                            | 13.1956(3)                                                     |
| $\alpha/^\circ$                                | 90                                                             |
| $\beta/^\circ$                                 | 94.489(2)                                                      |
| $\gamma/^\circ$                                | 90                                                             |
| Volume/Å <sup>3</sup>                          | 1786.03(7)                                                     |
| Z                                              | 4                                                              |
| $\rho_{\text{calc}}/\text{g}/\text{cm}^3$      | 1.322                                                          |
| $\mu/\text{mm}^{-1}$                           | 1.762                                                          |
| F(000)                                         | 752.0                                                          |
| Crystal size/mm <sup>3</sup>                   | 0.3 × 0.2 × 0.1                                                |
| Radiation                                      | CuK $\alpha$ ( $\lambda$ = 1.54184)                            |
| 2 $\theta$ range for data collection/ $^\circ$ | 6.526 to 134.16                                                |
| Index ranges                                   | -16 ≤ h ≤ 14, -11 ≤ k ≤ 11, -12 ≤ l ≤ 15                       |
| Reflections collected                          | 6433                                                           |
| Independent reflections                        | 3164 [ $R_{\text{int}}$ = 0.0200, $R_{\text{sigma}}$ = 0.0232] |
| Data/restraints/parameters                     | 3164/0/228                                                     |
| Goodness-of-fit on F <sup>2</sup>              | 1.047                                                          |
| Final R indexes [ $I \geq 2\sigma(I)$ ]        | $R_1$ = 0.0343, $wR_2$ = 0.0920                                |
| Final R indexes [all data]                     | $R_1$ = 0.0360, $wR_2$ = 0.0933                                |
| Largest diff. peak/hole / e Å <sup>-3</sup>    | 0.27/-0.34                                                     |

**Table 2 Fractional Atomic Coordinates ( $\times 10^4$ ) and Equivalent Isotropic Displacement Parameters ( $\text{\AA}^2 \times 10^3$ ) for hxl\_180125.  $U_{\text{eq}}$  is defined as 1/3 of of the**

**trace of the orthogonalised  $U_{IJ}$  tensor.**

| <b>Atom</b> | <b><math>x</math></b> | <b><math>y</math></b> | <b><math>z</math></b> | <b><math>U(eq)</math></b> |
|-------------|-----------------------|-----------------------|-----------------------|---------------------------|
| S1          | 591.2(3)              | 262.4(4)              | 1638.4(3)             | 26.06(13)                 |
| O1          | 2490.4(7)             | 2073.2(10)            | 2459.5(7)             | 25.9(2)                   |
| O2          | 1097.7(8)             | -433.5(12)            | 893.0(9)              | 36.3(3)                   |
| N3          | 1343.3(9)             | 335.0(13)             | 2682.6(9)             | 24.5(3)                   |
| O4          | -318.1(9)             | -266.1(15)            | 1943.8(10)            | 44.3(3)                   |
| C5          | 3079.4(11)            | -183.9(15)            | 2565.5(10)            | 23.4(3)                   |
| C6          | 3034.5(11)            | -1493.1(15)           | 4630.9(11)            | 25.8(3)                   |
| C7          | 4102.7(11)            | 239.6(16)             | 2481.3(11)            | 25.8(3)                   |
| C8          | 3440.5(12)            | -325.4(16)            | 5062.3(12)            | 29.4(3)                   |
| C9          | 4033.2(11)            | 2343.0(15)            | 3477.2(11)            | 24.3(3)                   |
| C10         | 4554.9(11)            | 2984.1(16)            | 4297.3(11)            | 27.9(3)                   |
| C11         | 2192.3(11)            | -2016.0(16)           | 5025.3(12)            | 29.1(3)                   |
| C12         | 3456.9(11)            | -2150.9(15)           | 3730.4(12)            | 27.7(3)                   |
| C13         | 4087.8(12)            | 3839.2(16)            | 4925.5(12)            | 31.9(4)                   |
| C14         | 2558.2(12)            | 3521.1(15)            | 3912.7(12)            | 29.3(3)                   |
| C15         | 3029.8(11)            | 2638.0(15)            | 3307.0(11)            | 24.1(3)                   |
| C16         | 2344(1)               | 694.7(15)             | 2573(1)               | 22.5(3)                   |
| C17         | 4523.8(11)            | 1353.4(16)            | 2879.8(11)            | 26.3(3)                   |
| C18         | 3014.0(13)            | 315.1(17)             | 5854.0(12)            | 33.9(4)                   |
| C19         | 2171.0(13)            | -211.9(17)            | 6233.1(12)            | 34.5(4)                   |
| C20         | 914.4(11)             | 831.0(18)             | 3606.9(12)            | 31.7(4)                   |
| C21         | 1769.6(12)            | -1383.8(17)           | 5819.1(12)            | 32.8(4)                   |
| C22         | 387.5(14)             | 1910.7(18)            | 1204.6(14)            | 40.2(4)                   |
| C23         | 3088.5(13)            | 4114.6(16)            | 4735.8(12)            | 32.7(4)                   |
| C24         | 2934.2(11)            | -1666.1(15)           | 2713.4(11)            | 26.6(3)                   |



**Table 3 Anisotropic Displacement Parameters ( $\text{\AA}^2 \times 10^3$ ) for hxl\_180125. The**

**Anisotropic displacement factor exponent takes the form:**

$$-2\pi^2[h^2a^{*2}U_{11}+2hka^*b^*U_{12}+\dots].$$

| Atom | U <sub>11</sub> | U <sub>22</sub> | U <sub>33</sub> | U <sub>23</sub> | U <sub>13</sub> | U <sub>12</sub> |
|------|-----------------|-----------------|-----------------|-----------------|-----------------|-----------------|
| S1   | 19.5(2)         | 29.5(2)         | 28.1(2)         | -3.03(14)       | -5.21(14)       | -0.70(13)       |
| O1   | 23.9(5)         | 26.0(5)         | 26.3(5)         | 3.3(4)          | -7.1(4)         | -0.9(4)         |
| O2   | 32.3(6)         | 43.0(7)         | 32.3(6)         | -13.3(5)        | -6.1(5)         | 5.6(5)          |
| N3   | 19.3(6)         | 29.7(7)         | 23.9(6)         | -1.4(5)         | -2.7(5)         | 0.4(5)          |
| O4   | 24.2(6)         | 64.3(9)         | 43.2(7)         | 0.4(6)          | -4.3(5)         | -14.3(6)        |
| C5   | 23.1(7)         | 29.7(8)         | 16.6(6)         | -2.5(5)         | -2.6(5)         | -0.3(6)         |
| C6   | 25.1(7)         | 26.9(7)         | 24.8(7)         | 4.9(6)          | -2.6(6)         | 5.1(6)          |
| C7   | 22.1(7)         | 33.7(8)         | 21.4(7)         | 0.5(6)          | 0.8(5)          | 3.2(6)          |
| C8   | 28.5(8)         | 31.2(8)         | 27.7(8)         | 3.8(6)          | -2.2(6)         | -0.4(6)         |
| C9   | 23.2(7)         | 27.2(7)         | 22.1(7)         | 4.6(6)          | -0.1(5)         | -4.2(6)         |
| C10  | 24.9(7)         | 32.4(8)         | 25.9(7)         | 4.5(6)          | -2.8(6)         | -6.6(6)         |
| C11  | 27.9(8)         | 27.0(8)         | 31.8(8)         | 4.8(6)          | -1.2(6)         | 1.1(6)          |
| C12  | 26.7(7)         | 25.6(7)         | 30.5(8)         | 1.4(6)          | -0.6(6)         | 4.3(6)          |
| C13  | 39.3(9)         | 30.7(8)         | 25.3(7)         | -1.1(6)         | 0.1(6)          | -11.1(7)        |
| C14  | 27.2(8)         | 25.4(8)         | 35.2(8)         | 3.0(6)          | 1.8(6)          | 0.2(6)          |
| C15  | 25.4(7)         | 22.8(7)         | 23.2(7)         | 3.7(6)          | -2.7(6)         | -3.3(6)         |
| C16  | 20.7(7)         | 26.6(7)         | 19.3(7)         | 0.7(5)          | -4.2(5)         | -1.4(6)         |
| C17  | 19.4(7)         | 35.5(8)         | 23.7(7)         | 4.5(6)          | 1.1(5)          | -0.6(6)         |
| C18  | 40.4(9)         | 32.8(9)         | 27.5(8)         | -1.0(6)         | -3.7(7)         | 1.9(7)          |
| C19  | 40.2(9)         | 37.8(9)         | 25.4(8)         | 3.1(7)          | 2.8(7)          | 11.7(7)         |
| C20  | 25.5(8)         | 42.8(9)         | 26.8(8)         | -1.2(7)         | 2.2(6)          | -1.2(7)         |
| C21  | 29.2(8)         | 38.2(9)         | 31.3(8)         | 10.6(7)         | 3.8(6)          | 5.5(7)          |

|     |          |         |         |         |          |         |
|-----|----------|---------|---------|---------|----------|---------|
| C22 | 42.1(10) | 35.2(9) | 40.1(9) | 1.1(7)  | -16.1(8) | 9.1(8)  |
| C23 | 40.0(9)  | 26.2(8) | 32.6(8) | -2.0(6) | 7.2(7)   | -2.3(7) |
| C24 | 26.0(7)  | 27.0(8) | 26.1(7) | -4.3(6) | -1.1(6)  | 1.7(6)  |

**Table 4 Bond Lengths for hxl\_180125.**

| Atom Atom Length/Å |     |            | Atom Atom Length/Å |     |          |
|--------------------|-----|------------|--------------------|-----|----------|
| S1                 | O2  | 1.4250(12) | C7                 | C17 | 1.340(2) |
| S1                 | N3  | 1.6516(12) | C8                 | C18 | 1.390(2) |
| S1                 | O4  | 1.4302(12) | C9                 | C10 | 1.401(2) |
| S1                 | C22 | 1.7586(18) | C9                 | C15 | 1.396(2) |
| O1                 | C15 | 1.4064(17) | C9                 | C17 | 1.458(2) |
| O1                 | C16 | 1.4015(18) | C10                | C13 | 1.379(2) |
| N3                 | C16 | 1.4245(18) | C11                | C21 | 1.386(2) |
| N3                 | C20 | 1.4778(19) | C12                | C24 | 1.546(2) |
| C5                 | C7  | 1.466(2)   | C13                | C23 | 1.389(2) |
| C5                 | C16 | 1.331(2)   | C14                | C15 | 1.381(2) |
| C5                 | C24 | 1.509(2)   | C14                | C23 | 1.389(2) |
| C6                 | C8  | 1.393(2)   | C18                | C19 | 1.389(2) |
| C6                 | C11 | 1.395(2)   | C19                | C21 | 1.386(3) |
| C6                 | C12 | 1.510(2)   |                    |     |          |

**Table 5 Bond Angles for hxl\_180125.**

| Atom Atom Atom Angle/° |    |    |           | Atom Atom Atom Angle/° |    |     |            |
|------------------------|----|----|-----------|------------------------|----|-----|------------|
| O2                     | S1 | N3 | 107.25(6) | C15                    | C9 | C10 | 117.15(14) |
| O2                     | S1 | O4 | 119.26(8) | C15                    | C9 | C17 | 122.58(13) |

|     |    |     |            |     |     |     |            |
|-----|----|-----|------------|-----|-----|-----|------------|
| O2  | S1 | C22 | 107.74(9)  | C13 | C10 | C9  | 121.25(14) |
| N3  | S1 | C22 | 107.56(7)  | C21 | C11 | C6  | 120.77(15) |
| O4  | S1 | N3  | 105.83(7)  | C6  | C12 | C24 | 111.69(12) |
| O4  | S1 | C22 | 108.68(9)  | C10 | C13 | C23 | 120.25(14) |
| C16 | O1 | C15 | 112.27(10) | C15 | C14 | C23 | 119.32(15) |
| C16 | N3 | S1  | 117.35(10) | C9  | C15 | O1  | 119.00(13) |
| C16 | N3 | C20 | 116.12(12) | C14 | C15 | O1  | 118.69(13) |
| C20 | N3 | S1  | 116.43(10) | C14 | C15 | C9  | 122.23(14) |
| C7  | C5 | C24 | 115.32(13) | O1  | C16 | N3  | 113.79(12) |
| C16 | C5 | C7  | 121.81(14) | C5  | C16 | O1  | 122.33(13) |
| C16 | C5 | C24 | 122.75(14) | C5  | C16 | N3  | 123.87(14) |
| C8  | C6 | C11 | 118.12(14) | C7  | C17 | C9  | 125.19(13) |
| C8  | C6 | C12 | 121.57(14) | C19 | C18 | C8  | 120.01(16) |
| C11 | C6 | C12 | 120.25(14) | C21 | C19 | C18 | 119.24(15) |
| C17 | C7 | C5  | 126.05(14) | C11 | C21 | C19 | 120.65(15) |
| C18 | C8 | C6  | 121.19(15) | C14 | C23 | C13 | 119.76(15) |
| C10 | C9 | C17 | 120.17(13) | C5  | C24 | C12 | 111.35(12) |

**Table 6 Torsion Angles for hxl\_180125.**

| A  | B  | C   | D   | Angle/°     | A   | B   | C   | D   | Angle/°     |
|----|----|-----|-----|-------------|-----|-----|-----|-----|-------------|
| S1 | N3 | C16 | O1  | 79.54(13)   | C12 | C6  | C11 | C21 | -176.80(13) |
| S1 | N3 | C16 | C5  | -99.73(15)  | C15 | O1  | C16 | N3  | 111.45(13)  |
| O2 | S1 | N3  | C16 | 45.03(13)   | C15 | O1  | C16 | C5  | -69.27(17)  |
| O2 | S1 | N3  | C20 | -170.81(11) | C15 | C9  | C10 | C13 | 1.8(2)      |
| O4 | S1 | N3  | C16 | 173.34(11)  | C15 | C9  | C17 | C7  | -32.7(2)    |
| O4 | S1 | N3  | C20 | -42.50(13)  | C15 | C14 | C23 | C13 | 1.5(2)      |

|              |             |              |             |
|--------------|-------------|--------------|-------------|
| C5 C7 C17C9  | 0.4(2)      | C16O1 C15C9  | 71.00(16)   |
| C6 C8 C18C19 | 0.4(2)      | C16O1 C15C14 | -112.30(15) |
| C6 C11C21C19 | 0.5(2)      | C16C5 C7 C17 | 34.9(2)     |
| C6 C12C24C5  | 62.58(17)   | C16C5 C24C12 | -112.32(16) |
| C7 C5 C16O1  | 2.7(2)      | C17C9 C10C13 | -174.51(14) |
| C7 C5 C16N3  | -178.12(12) | C17C9 C15O1  | -7.2(2)     |
| C7 C5 C24C12 | 63.68(16)   | C17C9 C15C14 | 176.25(14)  |
| C8 C6 C11C21 | 0.4(2)      | C18C19C21C11 | -1.0(2)     |
| C8 C6 C12C24 | -92.83(17)  | C20N3 C16O1  | -64.74(16)  |
| C8 C18C19C21 | 0.6(2)      | C20N3 C16C5  | 116.00(16)  |
| C9 C10C13C23 | -2.0(2)     | C22S1 N3 C16 | -70.62(13)  |
| C10C9 C15O1  | 176.57(12)  | C22S1 N3 C20 | 73.54(13)   |
| C10C9 C15C14 | 0.0(2)      | C23C14C15O1  | -178.25(13) |
| C10C9 C17C7  | 143.47(15)  | C23C14C15C9  | -1.7(2)     |
| C10C13C23C14 | 0.3(2)      | C24C5 C7 C17 | -141.13(15) |
| C11C6 C8 C18 | -0.9(2)     | C24C5 C16O1  | 178.42(12)  |
| C11C6 C12C24 | 84.31(17)   | C24C5 C16N3  | -2.4(2)     |
| C12C6 C8 C18 | 176.32(14)  |              |             |

**Table 7 Hydrogen Atom Coordinates ( $\text{\AA} \times 10^4$ ) and Isotropic Displacement Parameters ( $\text{\AA}^2 \times 10^3$ ) for hxl\_180125.**

| Atom | <i>x</i> | <i>y</i> | <i>z</i> | U(eq) |
|------|----------|----------|----------|-------|
| H7   | 4504.61  | -328.17  | 2109.72  | 31    |
| H8   | 4019.39  | 39.59    | 4810.86  | 35    |
| H10  | 5243.18  | 2826.78  | 4423.03  | 34    |
| H11  | 1905.12  | -2814.93 | 4746.36  | 35    |

|      |         |          |         |    |
|------|---------|----------|---------|----|
| H12A | 3384.05 | -3133.57 | 3783.19 | 33 |
| H12B | 4170.41 | -1945.13 | 3741.27 | 33 |
| H13  | 4451.13 | 4241.3   | 5490.01 | 38 |
| H14  | 1878.05 | 3720.35  | 3767.62 | 35 |
| H17  | 5195.45 | 1510.65  | 2764    | 32 |
| H18  | 3299.15 | 1113.5   | 6135.95 | 41 |
| H19  | 1872.85 | 225.94   | 6770.09 | 41 |
| H20A | 753.66  | 1782.83  | 3524.95 | 48 |
| H20B | 1392.81 | 712.13   | 4195.3  | 48 |
| H20C | 312.42  | 326.97   | 3713.32 | 48 |
| H21  | 1199.18 | -1757.37 | 6082.01 | 39 |
| H22A | 1016.47 | 2311.19  | 1048.46 | 60 |
| H22B | 99.51   | 2438.08  | 1733.33 | 60 |
| H22C | -67.02  | 1901.38  | 590.12  | 60 |
| H23  | 2768.84 | 4707.01  | 5167.66 | 39 |
| H24A | 3200.8  | -2159.49 | 2144.65 | 32 |
| H24B | 2219.4  | -1862.91 | 2704.51 | 32 |

## 8.2 X-ray data for compound 3jc

Single crystals of  $C_{15}H_{17}N_2O_5ClS$  [hxl\_180420] were colourless block. A suitable crystal was selected and on a **Xcalibur, Onyx, Nova** diffractometer. The crystal was kept at 100 K during data collection. Using Olex2 [1], the structure was solved with the ShelXS [2] structure solution program using Direct Methods and refined with the ShelXL [3] refinement package using Least Squares minimisation.

**Crystal Data** for  $C_{15}H_{17}N_2O_5ClS$  ( $M=372.82$  g/mol): monoclinic, space group  $P2_1/c$  (no. 14),  $a = 8.5374(3)$  Å,  $b = 10.4577(3)$  Å,  $c = 18.7809(6)$  Å,  $\beta = 97.412(3)^\circ$ ,  $V = 1662.79(9)$  Å<sup>3</sup>,  $Z = 4$ ,  $T = 100$  K,  $\mu(CuK\alpha) = 3.473$  mm<sup>-1</sup>,  $D_{calc} = 1.489$  g/cm<sup>3</sup>, 6037 reflections measured ( $9.498^\circ \leq 2\theta \leq 134.116^\circ$ ), 2968 unique ( $R_{int} = 0.0328$ ,

$R_{\text{sigma}} = 0.0334$ ) which were used in all calculations. The final  $R_1$  was 0.0417 ( $I > 2\sigma(I)$ ) and  $wR_2$  was 0.1116 (all data).

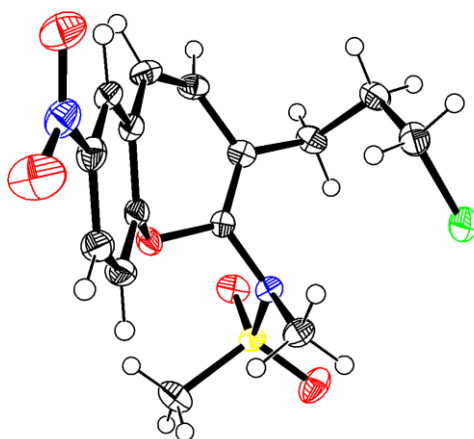

**Table 1 Crystal data and structure refinement for hxl\_180420.**

|                                       |                                                            |
|---------------------------------------|------------------------------------------------------------|
| Identification code                   | hxl_180420                                                 |
| Empirical formula                     | $\text{C}_{15}\text{H}_{17}\text{N}_2\text{O}_5\text{ClS}$ |
| Formula weight                        | 372.82                                                     |
| Temperature/K                         | 100                                                        |
| Crystal system                        | monoclinic                                                 |
| Space group                           | $P2_1/c$                                                   |
| $a/\text{\AA}$                        | 8.5374(3)                                                  |
| $b/\text{\AA}$                        | 10.4577(3)                                                 |
| $c/\text{\AA}$                        | 18.7809(6)                                                 |
| $\alpha/^\circ$                       | 90                                                         |
| $\beta/^\circ$                        | 97.412(3)                                                  |
| $\gamma/^\circ$                       | 90                                                         |
| Volume/ $\text{\AA}^3$                | 1662.79(9)                                                 |
| Z                                     | 4                                                          |
| $\rho_{\text{calc}}/\text{g cm}^{-3}$ | 1.489                                                      |
| $\mu/\text{mm}^{-1}$                  | 3.473                                                      |
| $F(000)$                              | 776.0                                                      |

|                                             |                                                               |
|---------------------------------------------|---------------------------------------------------------------|
| Crystal size/mm <sup>3</sup>                | 0.3 × 0.2 × 0.1                                               |
| Radiation                                   | CuKα (λ = 1.54184)                                            |
| 2θ range for data collection/°              | 9.498 to 134.116                                              |
| Index ranges                                | -10 ≤ h ≤ 8, -12 ≤ k ≤ 12, -20 ≤ l ≤ 22                       |
| Reflections collected                       | 6037                                                          |
| Independent reflections                     | 2968 [R <sub>int</sub> = 0.0328, R <sub>sigma</sub> = 0.0334] |
| Data/restraints/parameters                  | 2968/0/219                                                    |
| Goodness-of-fit on F <sup>2</sup>           | 1.077                                                         |
| Final R indexes [I ≥ 2σ (I)]                | R <sub>1</sub> = 0.0417, wR <sub>2</sub> = 0.1093             |
| Final R indexes [all data]                  | R <sub>1</sub> = 0.0448, wR <sub>2</sub> = 0.1116             |
| Largest diff. peak/hole / e Å <sup>-3</sup> | 0.37/-0.34                                                    |

**Table 2 Fractional Atomic Coordinates (×10<sup>4</sup>) and Equivalent Isotropic Displacement Parameters (Å<sup>2</sup>×10<sup>3</sup>) for hxl\_180420. U<sub>eq</sub> is defined as 1/3 of the trace of the orthogonalised U<sub>ij</sub> tensor.**

| Atom | <i>x</i>   | <i>y</i>   | <i>z</i>   | U(eq)     |
|------|------------|------------|------------|-----------|
| S1   | 4898.5(6)  | 1198.5(5)  | 2247.5(3)  | 20.74(16) |
| Cl2  | 10048.7(7) | 143.4(6)   | 2414.1(3)  | 37.75(19) |
| O1   | 5431.7(18) | 2770.5(14) | 790.3(8)   | 22.9(3)   |
| O2   | 9446(2)    | 6079.7(17) | -1089.1(9) | 35.5(4)   |
| O3   | 4186.3(19) | 162.3(15)  | 1823.3(9)  | 28.8(4)   |
| C4   | 7799(3)    | 4207(2)    | -497.5(11) | 22.4(4)   |
| N5   | 6405(2)    | 1686.2(16) | 1855.8(9)  | 19.9(4)   |
| O6   | 8819(3)    | 7493.6(17) | -338.9(11) | 45.7(5)   |
| N7   | 8803(2)    | 6398.6(19) | -571.0(10) | 28.4(4)   |
| O8   | 5492(2)    | 974.3(19)  | 2983.9(9)  | 37.4(4)   |
| C9   | 6533(3)    | 4851(2)    | 751.4(12)  | 25.6(5)   |

|     |          |            |            |         |
|-----|----------|------------|------------|---------|
| C10 | 6994(2)  | 3267(2)    | -156.3(11) | 20.9(4) |
| C11 | 7958(3)  | 5418(2)    | -207.7(12) | 24.0(5) |
| C12 | 6248(2)  | 1696.9(19) | 1095.6(11) | 18.9(4) |
| C13 | 6770(2)  | 775.0(19)  | 696.3(12)  | 21.1(4) |
| C14 | 6791(3)  | 1979(2)    | -457.0(12) | 24.9(5) |
| C15 | 7401(3)  | 2703(2)    | 2226.0(12) | 24.6(5) |
| C16 | 6377(3)  | 3627(2)    | 469.5(11)  | 21.0(4) |
| C17 | 6676(3)  | 895(2)     | -85.5(12)  | 24.0(5) |
| C18 | 9244(3)  | -577(2)    | 1011.3(13) | 28.8(5) |
| C19 | 7459(3)  | -453(2)    | 1022.6(13) | 25.3(5) |
| C20 | 7341(3)  | 5768(2)    | 411.5(12)  | 26.9(5) |
| C21 | 3541(3)  | 2473(2)    | 2212.7(15) | 34.7(6) |
| C22 | 10212(3) | 382(2)     | 1476.2(13) | 30.4(5) |

**Table 3 Anisotropic Displacement Parameters ( $\text{\AA}^2 \times 10^3$ ) for hxl\_180420. The**

**Anisotropic displacement factor exponent takes the form:**

$$-2\pi^2[h^2a^{*2}U_{11}+2hka^*b^*U_{12}+\dots].$$

| Atom | U <sub>11</sub> | U <sub>22</sub> | U <sub>33</sub> | U <sub>23</sub> | U <sub>13</sub> | U <sub>12</sub> |
|------|-----------------|-----------------|-----------------|-----------------|-----------------|-----------------|
| S1   | 23.0(3)         | 20.6(3)         | 19.4(3)         | 1.95(18)        | 5.6(2)          | -2.03(18)       |
| Cl2  | 38.8(4)         | 43.6(4)         | 29.8(3)         | 8.3(2)          | 0.5(2)          | 13.0(3)         |
| O1   | 23.6(8)         | 22.3(7)         | 24.1(8)         | 6.7(6)          | 7.8(6)          | 5.2(6)          |
| O2   | 43.8(10)        | 37.5(9)         | 27.2(9)         | 4.5(7)          | 12.0(8)         | -6.3(8)         |
| O3   | 29.1(8)         | 23.7(8)         | 34.9(9)         | -3.0(7)         | 9.3(7)          | -7.9(6)         |
| C4   | 24.4(11)        | 26.8(11)        | 16.1(10)        | 3.0(8)          | 2.7(8)          | 2.4(9)          |
| N5   | 22.9(9)         | 17.4(8)         | 19.5(9)         | 0.1(7)          | 3.2(7)          | -3.8(7)         |
| O6   | 74.7(15)        | 22.7(9)         | 42.9(11)        | 1.1(8)          | 19.4(10)        | -9.9(9)         |
| N7   | 34.4(11)        | 26.8(10)        | 24.0(10)        | 6.4(8)          | 3.1(8)          | -1.8(8)         |



|     |          |          |          |          |          |         |
|-----|----------|----------|----------|----------|----------|---------|
| O8  | 37.7(10) | 51.9(11) | 22.3(8)  | 10.4(8)  | 3.2(7)   | -6.7(8) |
| C9  | 34.7(12) | 21.7(11) | 21.8(11) | 2.4(8)   | 8.7(9)   | 6.9(9)  |
| C10 | 20.8(10) | 23.9(10) | 17.5(10) | 1.9(8)   | 0.9(8)   | 1.9(8)  |
| C11 | 27.0(11) | 22.4(10) | 22.5(11) | 6.9(9)   | 2.8(9)   | 0.2(9)  |
| C12 | 19.3(10) | 17.0(9)  | 20.3(10) | 1.9(8)   | 2.2(8)   | -1.9(8) |
| C13 | 20.3(10) | 18.0(10) | 25.6(11) | -0.9(8)  | 4.9(8)   | -4.8(8) |
| C14 | 26.5(11) | 30.4(11) | 18.3(10) | -4.5(9)  | 4.8(9)   | -3.7(9) |
| C15 | 27.1(11) | 23.0(11) | 23.2(11) | -3.7(8)  | 1.2(9)   | -5.8(9) |
| C16 | 22.8(11) | 20.9(10) | 19.5(10) | 5.3(8)   | 3.2(8)   | 3.6(8)  |
| C17 | 25.0(11) | 22.5(10) | 24.8(11) | -7.9(8)  | 5.0(9)   | -4.2(9) |
| C18 | 28.4(12) | 27.7(11) | 31.8(12) | 0.8(9)   | 9.1(10)  | 4.8(9)  |
| C19 | 27.1(11) | 17.2(10) | 32.9(12) | -1.1(9)  | 8.1(9)   | -1.5(9) |
| C20 | 39.1(13) | 18.5(10) | 23.4(11) | 1.2(8)   | 4.7(10)  | 5.1(9)  |
| C21 | 29.1(13) | 30.6(12) | 46.3(15) | -3.8(11) | 11.7(11) | 4.7(10) |
| C22 | 26.9(12) | 34.0(12) | 30.9(12) | 8.2(10)  | 6.3(10)  | 1.3(10) |

**Table 4 Bond Lengths for hxl\_180420.**

| Atom | Atom | Length/Å   | Atom | Atom | Length/Å |
|------|------|------------|------|------|----------|
| S1   | O3   | 1.4330(16) | N7   | C11  | 1.471(3) |
| S1   | N5   | 1.6435(17) | C9   | C16  | 1.385(3) |
| S1   | O8   | 1.4297(17) | C9   | C20  | 1.384(3) |
| S1   | C21  | 1.762(2)   | C10  | C14  | 1.463(3) |
| Cl2  | C22  | 1.802(2)   | C10  | C16  | 1.400(3) |
| O1   | C12  | 1.404(3)   | C11  | C20  | 1.386(3) |
| O1   | C16  | 1.394(3)   | C12  | C13  | 1.333(3) |
| O2   | N7   | 1.224(3)   | C13  | C17  | 1.466(3) |

|    |     |          |     |     |          |
|----|-----|----------|-----|-----|----------|
| C4 | C10 | 1.401(3) | C13 | C19 | 1.510(3) |
| C4 | C11 | 1.378(3) | C14 | C17 | 1.341(3) |
| N5 | C12 | 1.417(3) | C18 | C19 | 1.532(3) |
| N5 | C15 | 1.478(3) | C18 | C22 | 1.505(3) |
| O6 | N7  | 1.225(3) |     |     |          |

**Table 5 Bond Angles for hxl\_180420.**

| Atom Atom Atom |     |     | Angle/°    | Atom Atom Atom |     |     | Angle/°    |
|----------------|-----|-----|------------|----------------|-----|-----|------------|
| O3             | S1  | N5  | 106.64(9)  | C4             | C11 | N7  | 119.11(19) |
| O3             | S1  | C21 | 108.76(12) | C4             | C11 | C20 | 123.0(2)   |
| N5             | S1  | C21 | 107.32(11) | C20            | C11 | N7  | 117.9(2)   |
| O8             | S1  | O3  | 119.07(11) | O1             | C12 | N5  | 113.28(17) |
| O8             | S1  | N5  | 106.48(10) | C13            | C12 | O1  | 122.20(19) |
| O8             | S1  | C21 | 108.02(12) | C13            | C12 | N5  | 124.49(19) |
| C16            | O1  | C12 | 113.94(15) | C12            | C13 | C17 | 121.5(2)   |
| C11            | C4  | C10 | 119.5(2)   | C12            | C13 | C19 | 121.9(2)   |
| C12            | N5  | S1  | 118.41(14) | C17            | C13 | C19 | 116.61(19) |
| C12            | N5  | C15 | 116.26(16) | C17            | C14 | C10 | 126.2(2)   |
| C15            | N5  | S1  | 116.65(14) | O1             | C16 | C10 | 119.42(19) |
| O2             | N7  | O6  | 123.5(2)   | C9             | C16 | O1  | 117.46(18) |
| O2             | N7  | C11 | 118.42(19) | C9             | C16 | C10 | 122.8(2)   |
| O6             | N7  | C11 | 118.06(19) | C14            | C17 | C13 | 126.6(2)   |
| C20            | C9  | C16 | 119.5(2)   | C22            | C18 | C19 | 114.10(19) |
| C4             | C10 | C14 | 120.68(19) | C13            | C19 | C18 | 113.74(18) |
| C16            | C10 | C4  | 117.1(2)   | C9             | C20 | C11 | 118.0(2)   |
| C16            | C10 | C14 | 122.25(19) | C18            | C22 | C12 | 111.64(16) |

**Table 6 Torsion Angles for hxl\_180420.**

| A   | B   | C   | D   | Angle/°     | A   | B   | C   | D   | Angle/°    |
|-----|-----|-----|-----|-------------|-----|-----|-----|-----|------------|
| S1  | N5  | C12 | O1  | 80.51(19)   | C11 | C4  | C10 | C14 | 179.3(2)   |
| S1  | N5  | C12 | C13 | -97.6(2)    | C11 | C4  | C10 | C16 | 0.4(3)     |
| O1  | C12 | C13 | C17 | 6.9(3)      | C12 | O1  | C16 | C9  | -117.7(2)  |
| O1  | C12 | C13 | C19 | -172.01(18) | C12 | O1  | C16 | C10 | 68.5(2)    |
| O2  | N7  | C11 | C4  | -5.6(3)     | C12 | C13 | C17 | C14 | 32.5(3)    |
| O2  | N7  | C11 | C20 | 175.0(2)    | C12 | C13 | C19 | C18 | -109.6(2)  |
| O3  | S1  | N5  | C12 | 37.48(18)   | C14 | C10 | C16 | O1  | -5.2(3)    |
| O3  | S1  | N5  | C15 | -175.98(15) | C14 | C10 | C16 | C9  | -178.6(2)  |
| C4  | C10 | C14 | C17 | 150.3(2)    | C15 | N5  | C12 | O1  | -66.2(2)   |
| C4  | C10 | C16 | O1  | 173.62(18)  | C15 | N5  | C12 | C13 | 115.8(2)   |
| C4  | C10 | C16 | C9  | 0.2(3)      | C16 | O1  | C12 | N5  | 110.60(19) |
| C4  | C11 | C20 | C9  | 0.1(4)      | C16 | O1  | C12 | C13 | -71.3(2)   |
| N5  | C12 | C13 | C17 | -175.20(19) | C16 | C9  | C20 | C11 | 0.5(3)     |
| N5  | C12 | C13 | C19 | 5.9(3)      | C16 | C10 | C14 | C17 | -30.9(4)   |
| O6  | N7  | C11 | C4  | 174.1(2)    | C17 | C13 | C19 | C18 | 71.4(3)    |
| O6  | N7  | C11 | C20 | -5.2(3)     | C19 | C13 | C17 | C14 | -148.5(2)  |
| N7  | C11 | C20 | C9  | 179.4(2)    | C19 | C18 | C22 | C12 | 65.3(2)    |
| O8  | S1  | N5  | C12 | 165.60(16)  | C20 | C9  | C16 | O1  | -174.2(2)  |
| O8  | S1  | N5  | C15 | -47.87(18)  | C20 | C9  | C16 | C10 | -0.6(4)    |
| C10 | C4  | C11 | N7  | -179.88(19) | C21 | S1  | N5  | C12 | -78.92(18) |
| C10 | C4  | C11 | C20 | -0.6(3)     | C21 | S1  | N5  | C15 | 67.61(18)  |
| C10 | C14 | C17 | C13 | -1.8(4)     | C22 | C18 | C19 | C13 | 66.0(3)    |

**Table 7 Hydrogen Atom Coordinates ( $\text{\AA}\times 10^4$ ) and Isotropic Displacement Parameters ( $\text{\AA}^2\times 10^3$ ) for hxl\_180420.**

| Atom | <i>x</i> | <i>y</i> | <i>z</i> | U(eq) |
|------|----------|----------|----------|-------|
| H4   | 8232.85  | 4010.91  | -925.64  | 27    |
| H9   | 6087.55  | 5060.28  | 1174.8   | 31    |
| H14  | 6736.81  | 1901.87  | -963.59  | 30    |
| H15A | 6795.54  | 3500.9   | 2215.73  | 37    |
| H15B | 8336.89  | 2832.48  | 1982.4   | 37    |
| H15C | 7730.41  | 2451.39  | 2725.5   | 37    |
| H17  | 6516.46  | 128.56   | -356.42  | 29    |
| H18A | 9577.37  | -1448.22 | 1172.31  | 35    |
| H18B | 9470.52  | -477.85  | 510.44   | 35    |
| H19A | 6924.5   | -1183.67 | 757.86   | 30    |
| H19B | 7236.05  | -506.25  | 1526.14  | 30    |
| H20  | 7469.52  | 6611.48  | 597.16   | 32    |
| H21A | 3188.06  | 2694.2   | 1710.51  | 52    |
| H21B | 4051.23  | 3217.31  | 2461.02  | 52    |
| H21C | 2629.11  | 2216.93  | 2447.13  | 52    |
| H22A | 9850.92  | 1256.01  | 1334.3   | 36    |
| H22B | 11333.48 | 305.9    | 1398.94  | 36    |

## 9. References

- [1] T. Hamada, X. Ye and S. S. Stahl, *J. Am. Chem. Soc.*, 2008, **130**, 833-835.  
 [2] A. D. Gillie, R. J. Redd and P. W. Davies, *Adv.Synth. Catal.*, 2016, **358**, 226-239.

## 10. NMR spectrum of some starting materials and products

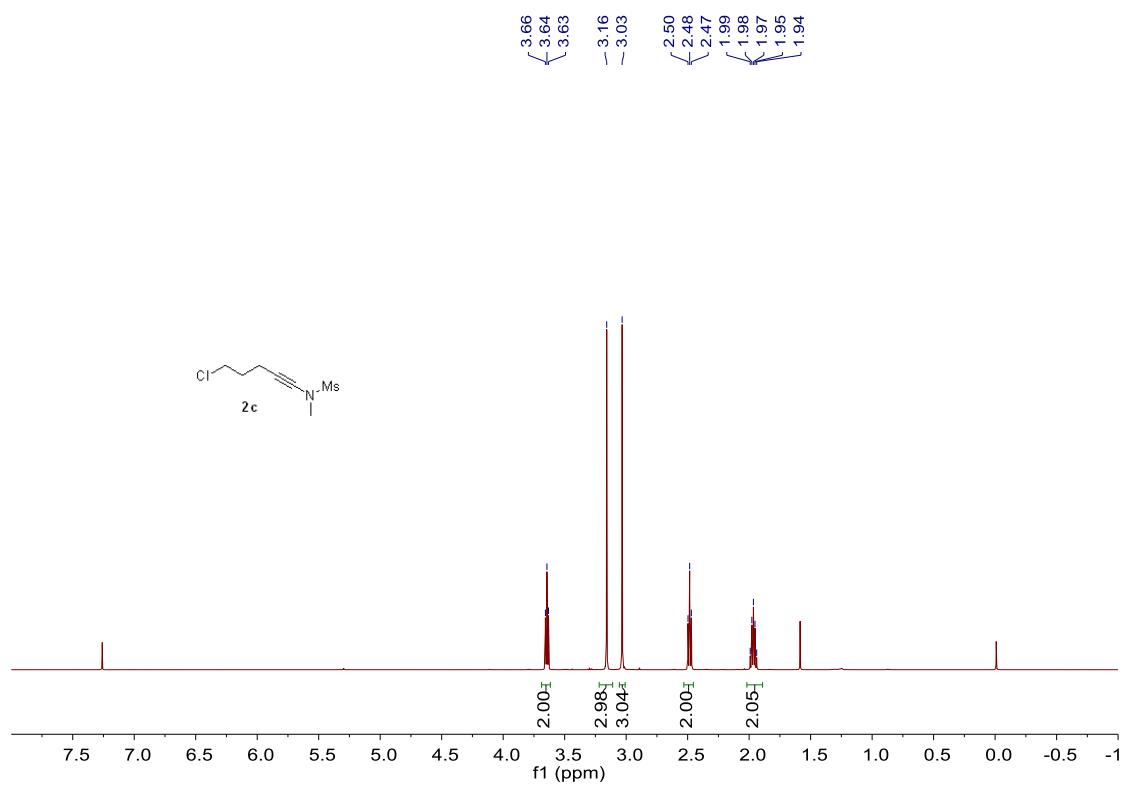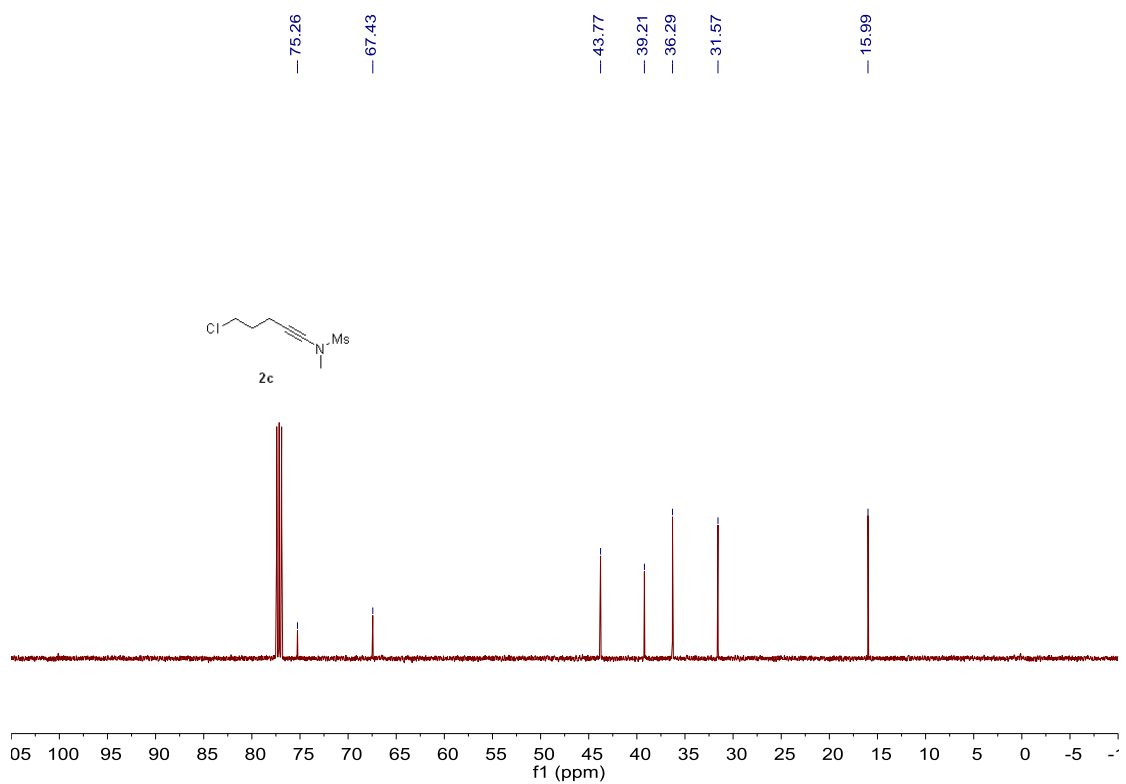

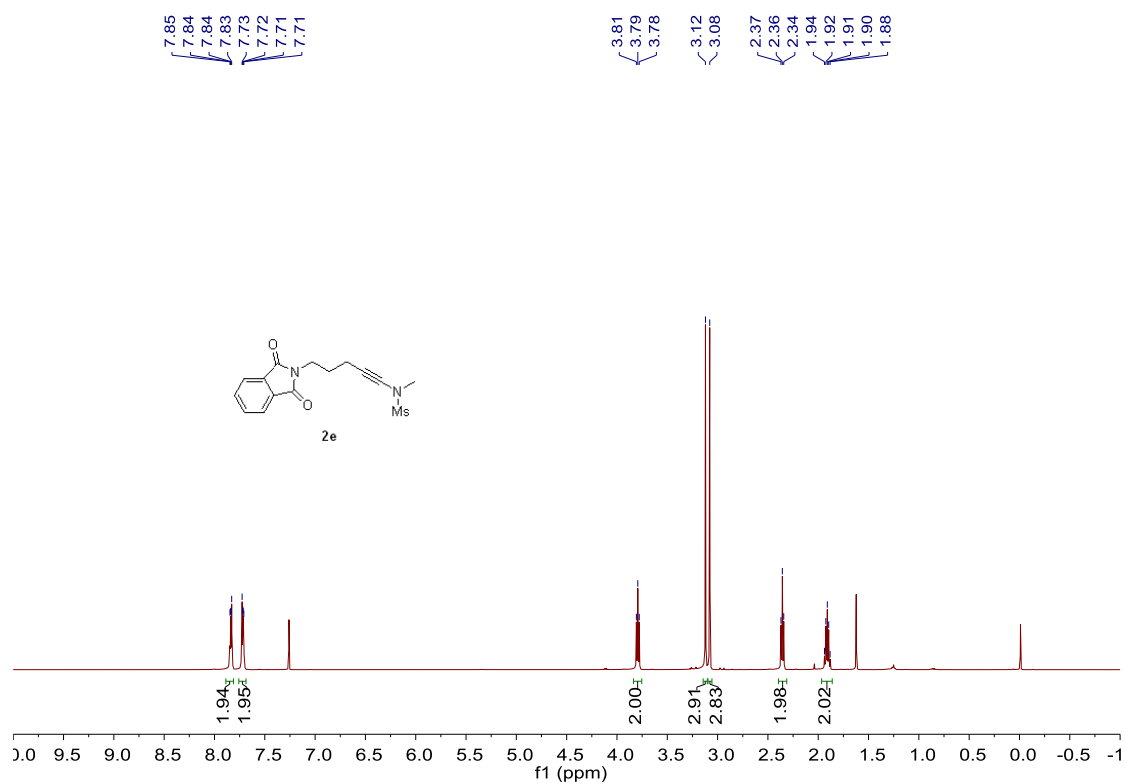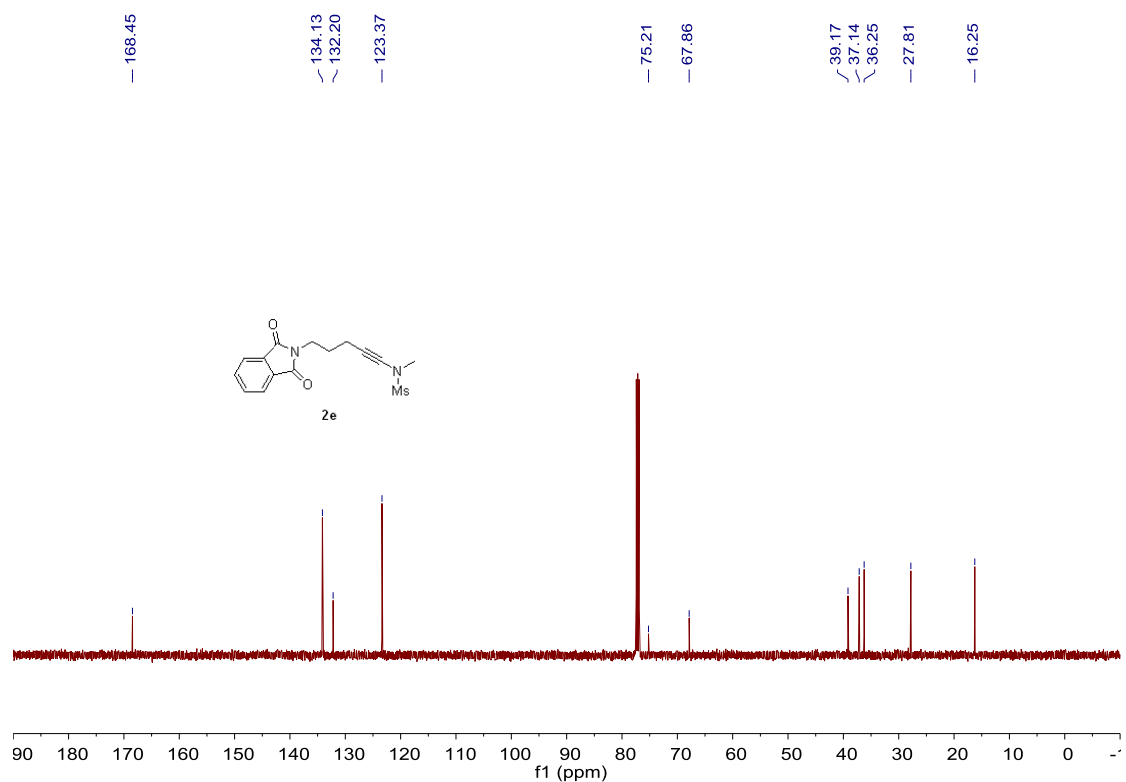

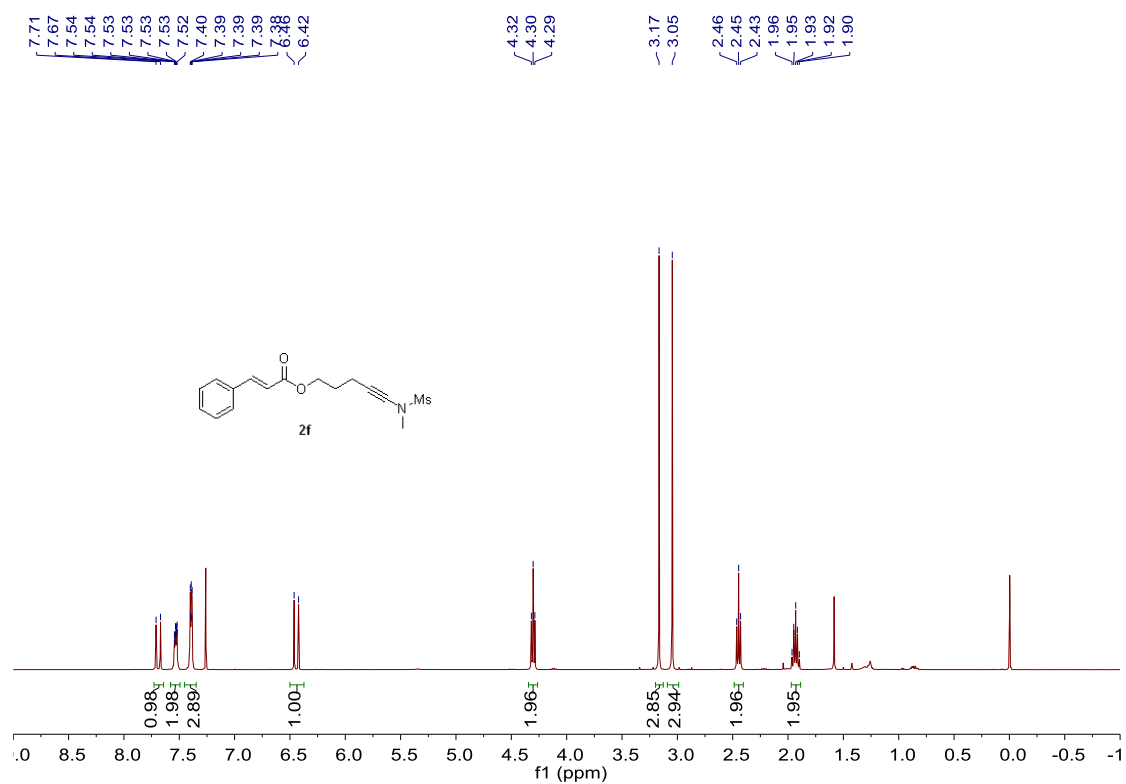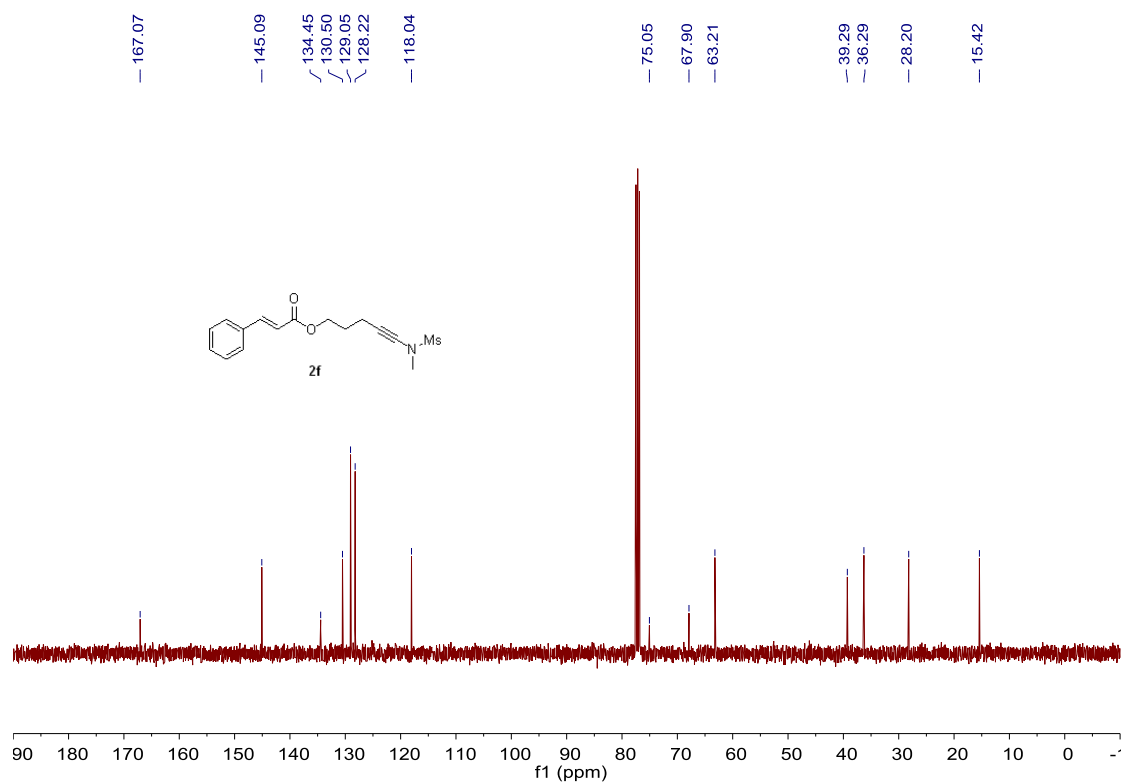

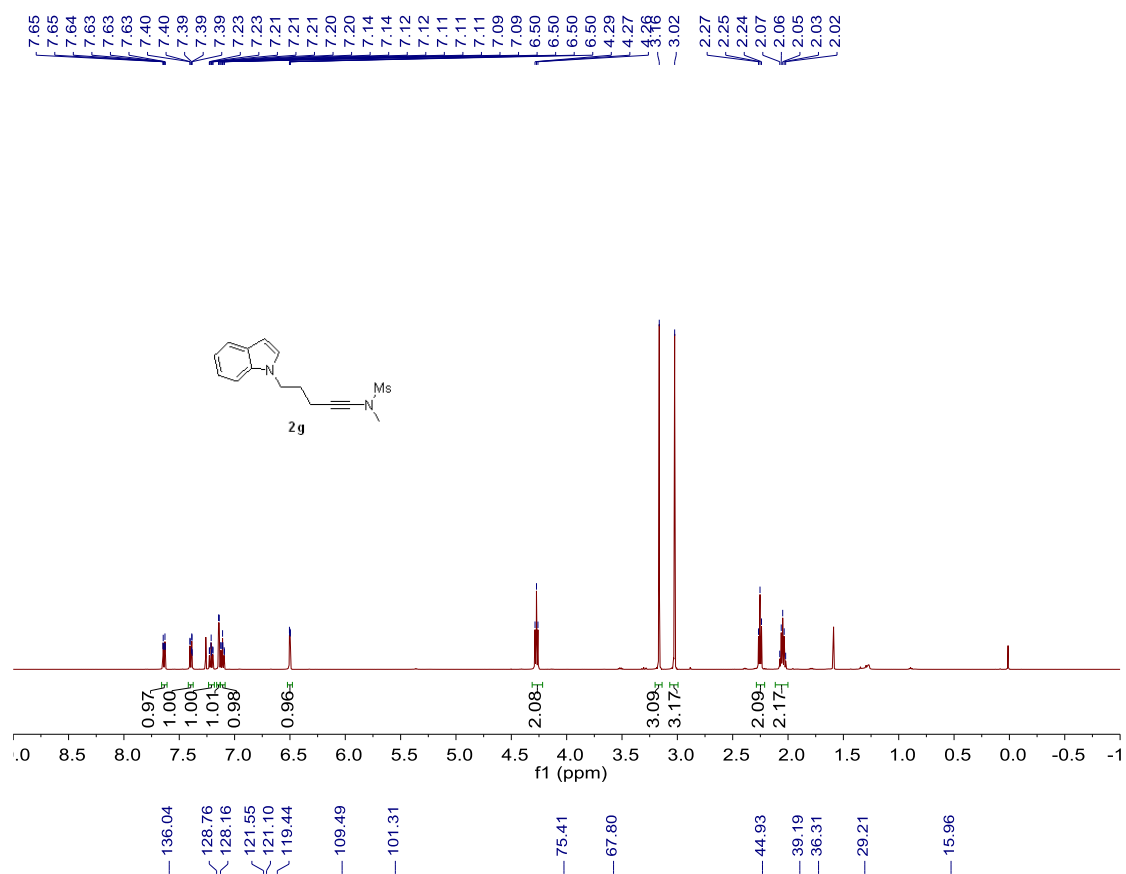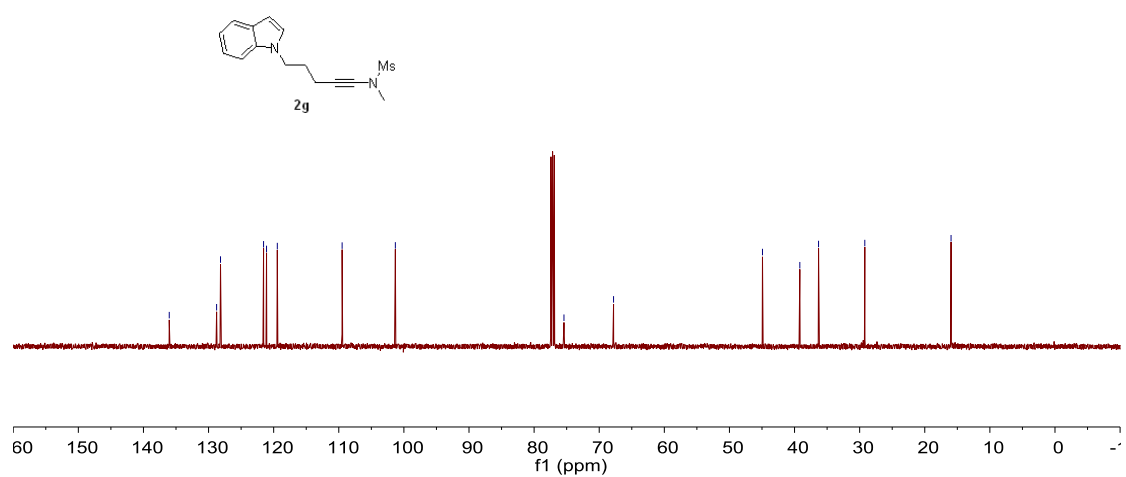



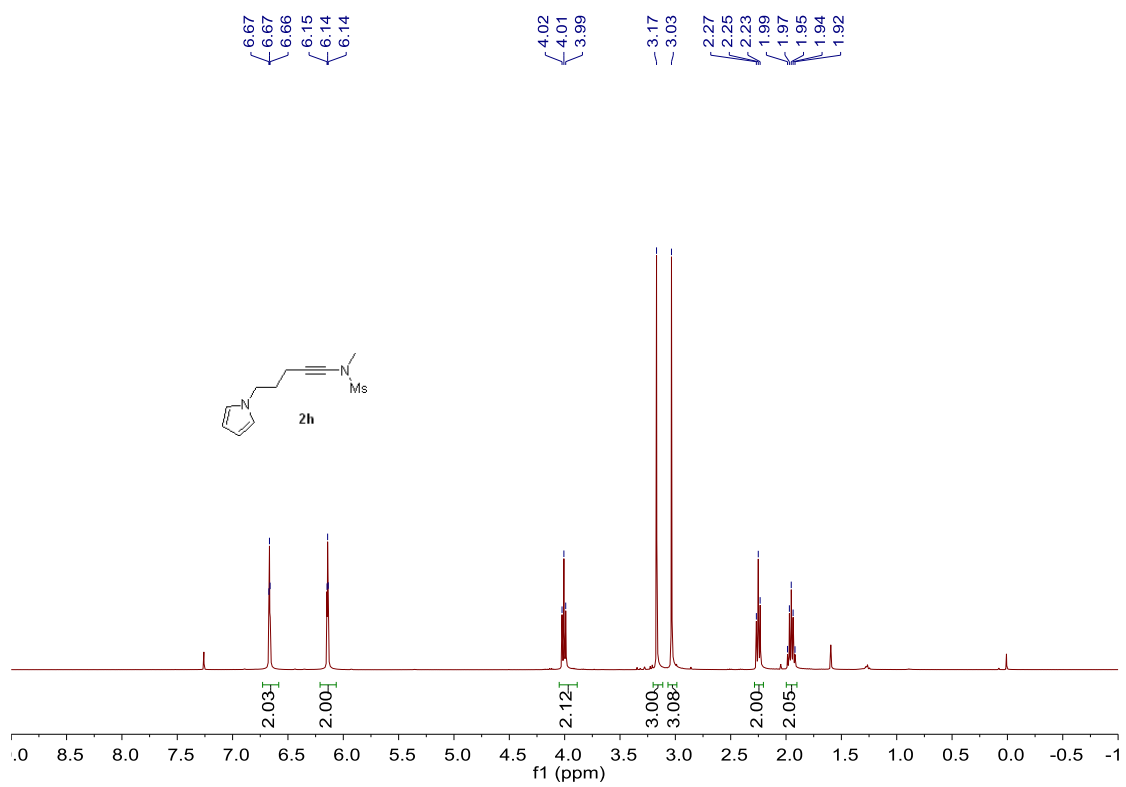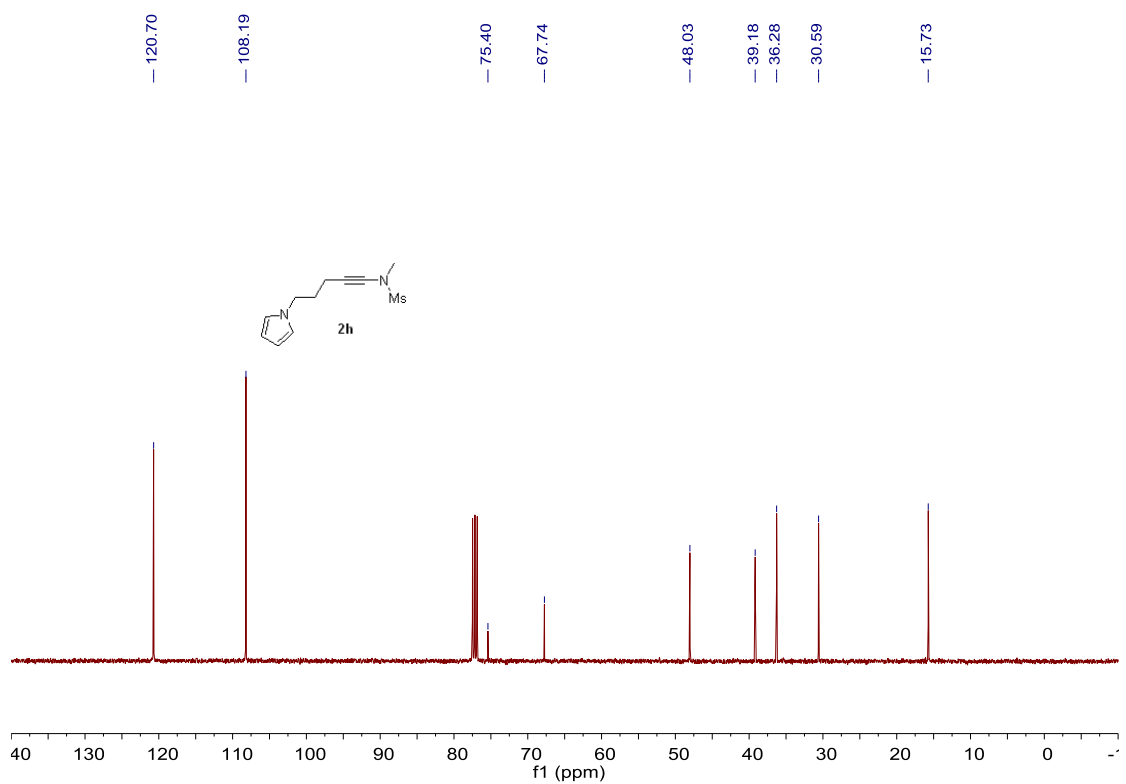

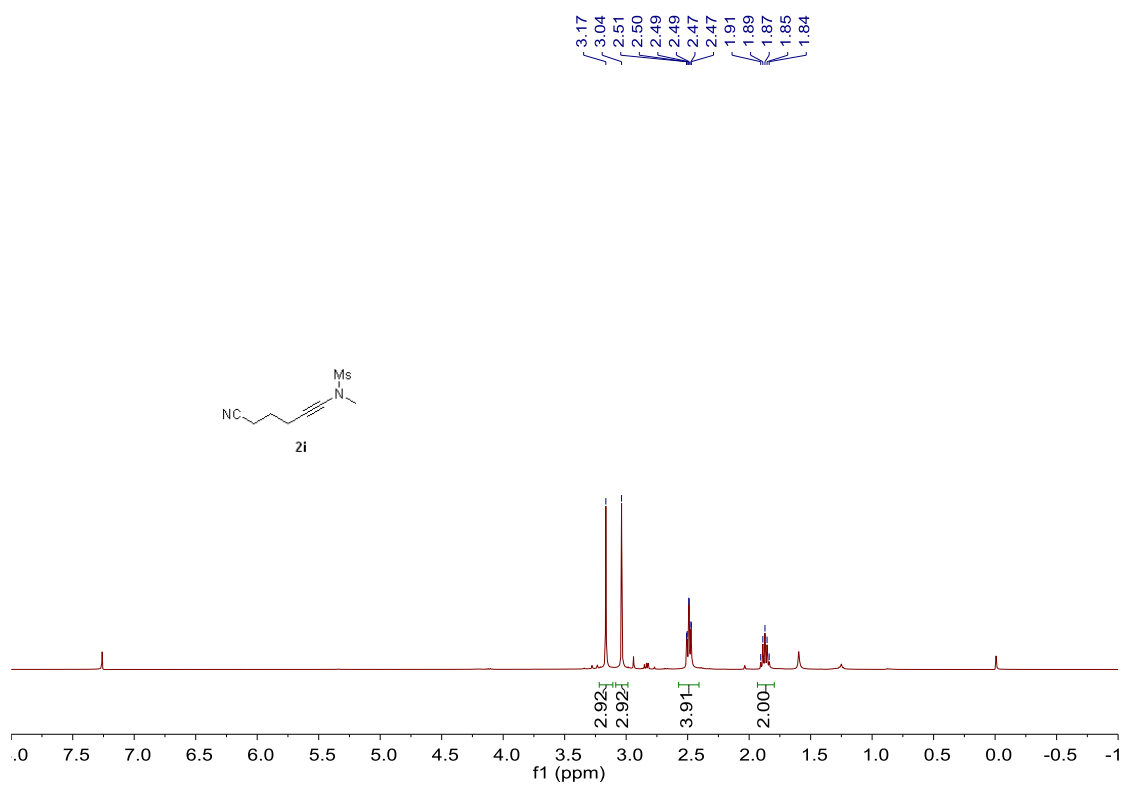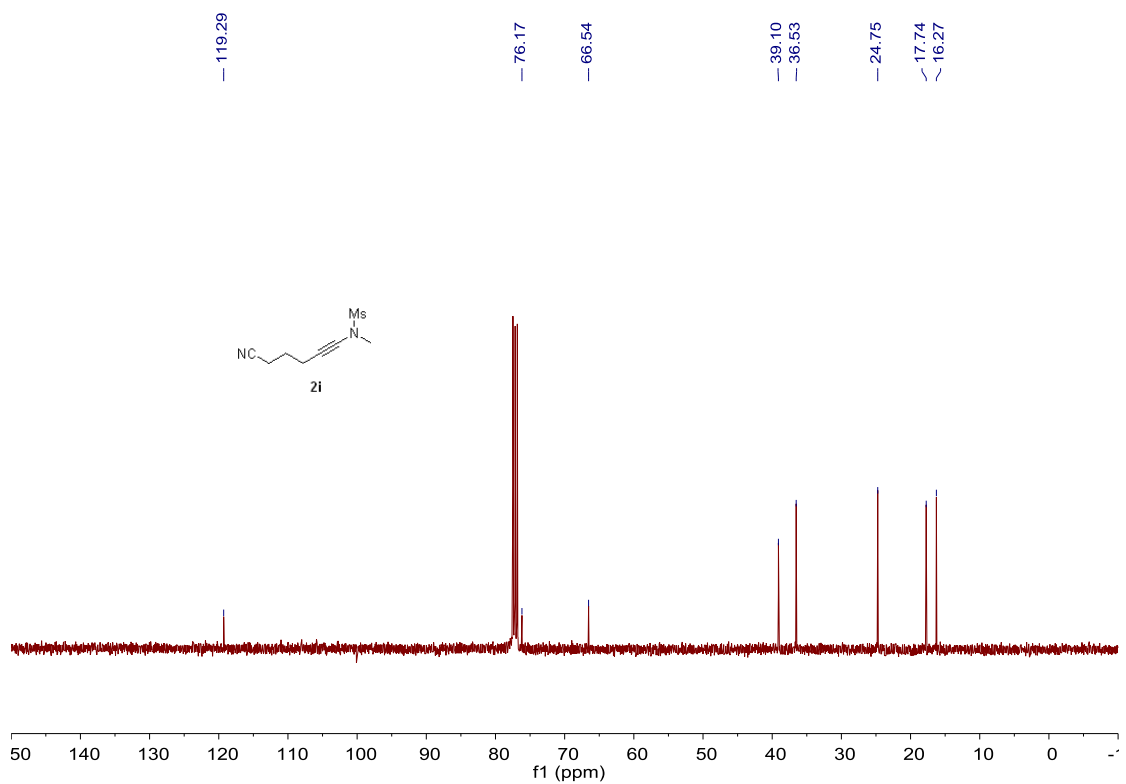

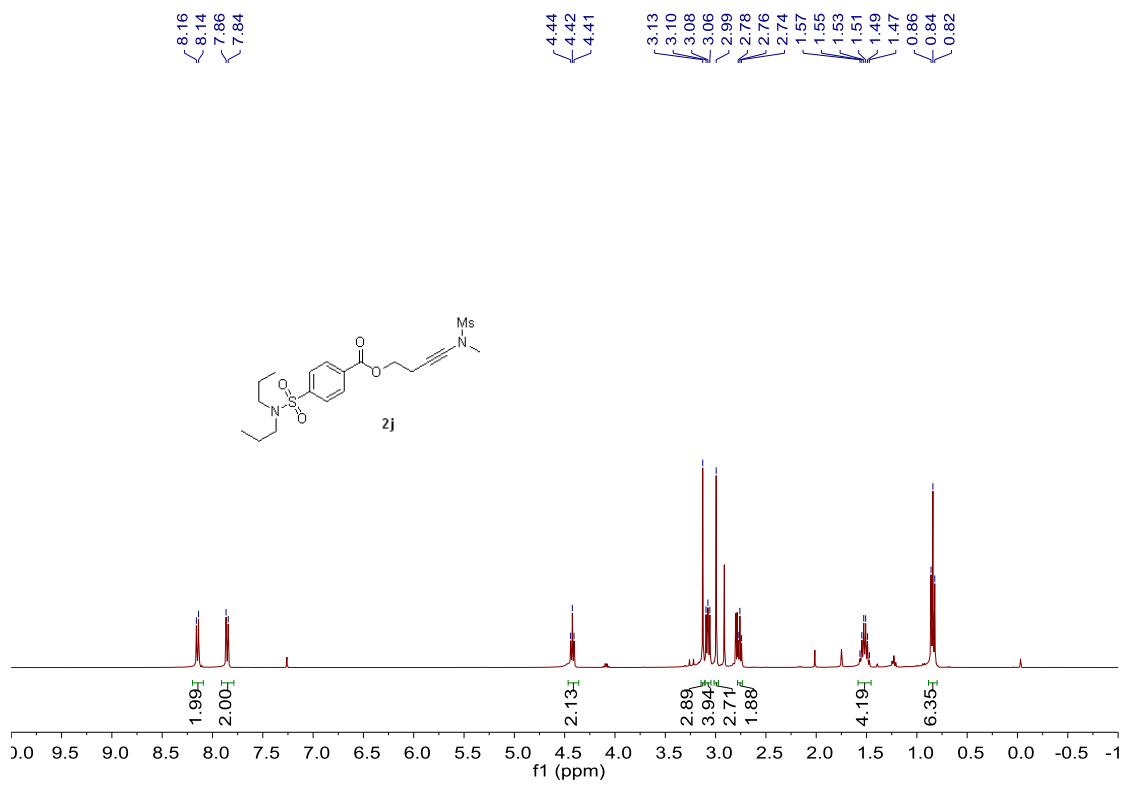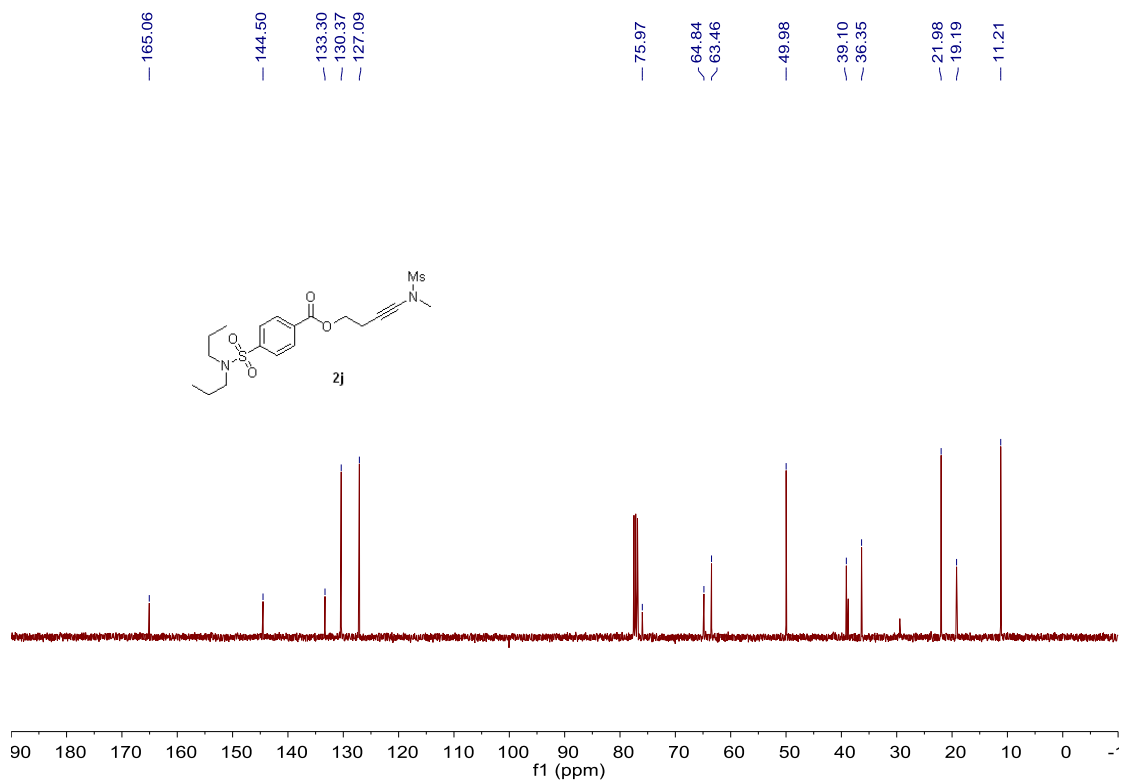

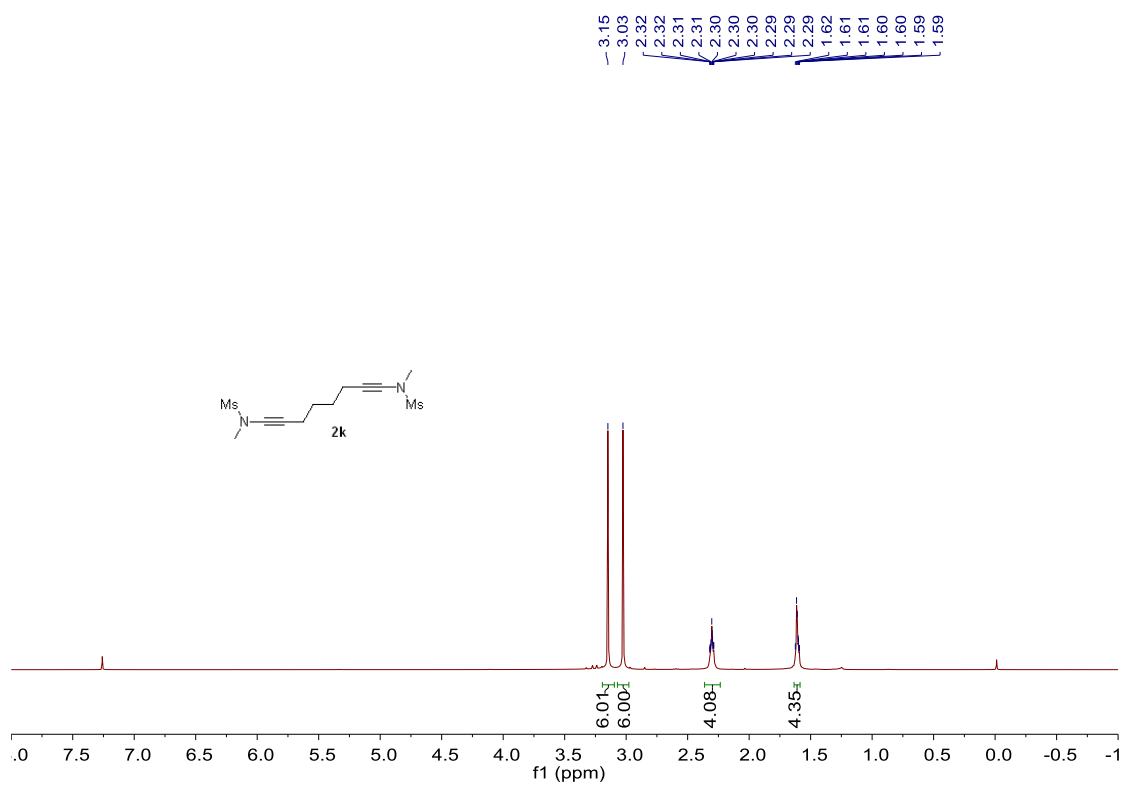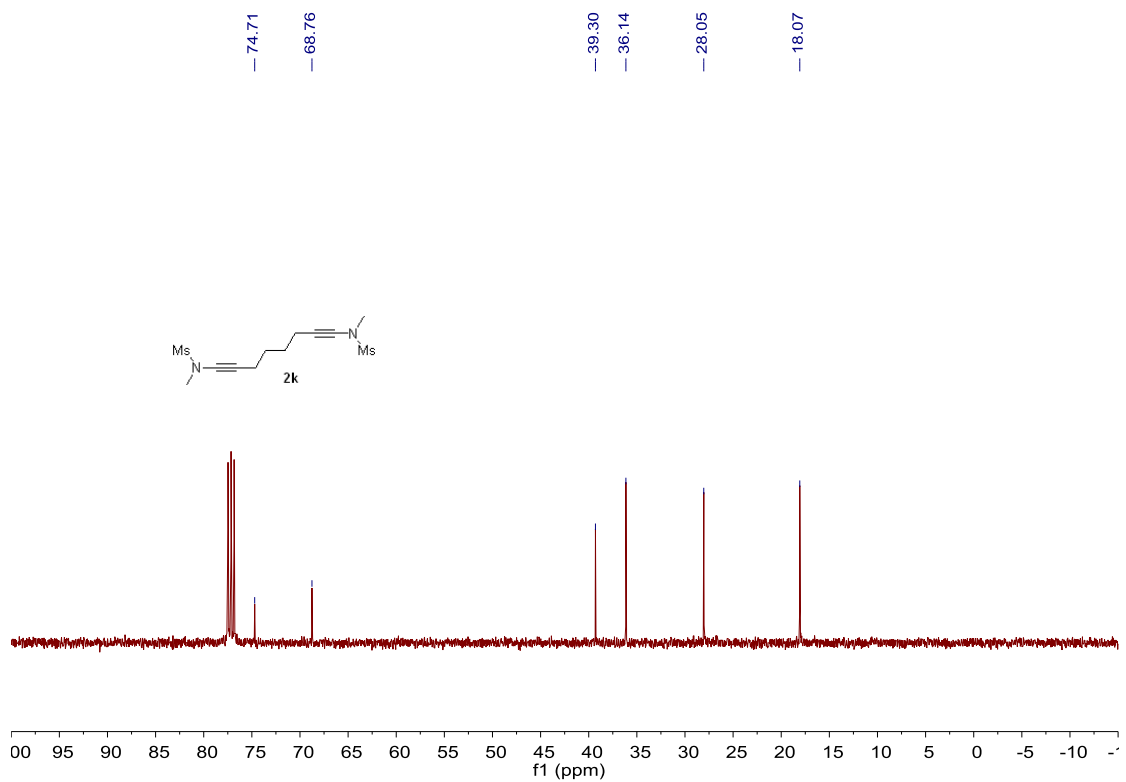

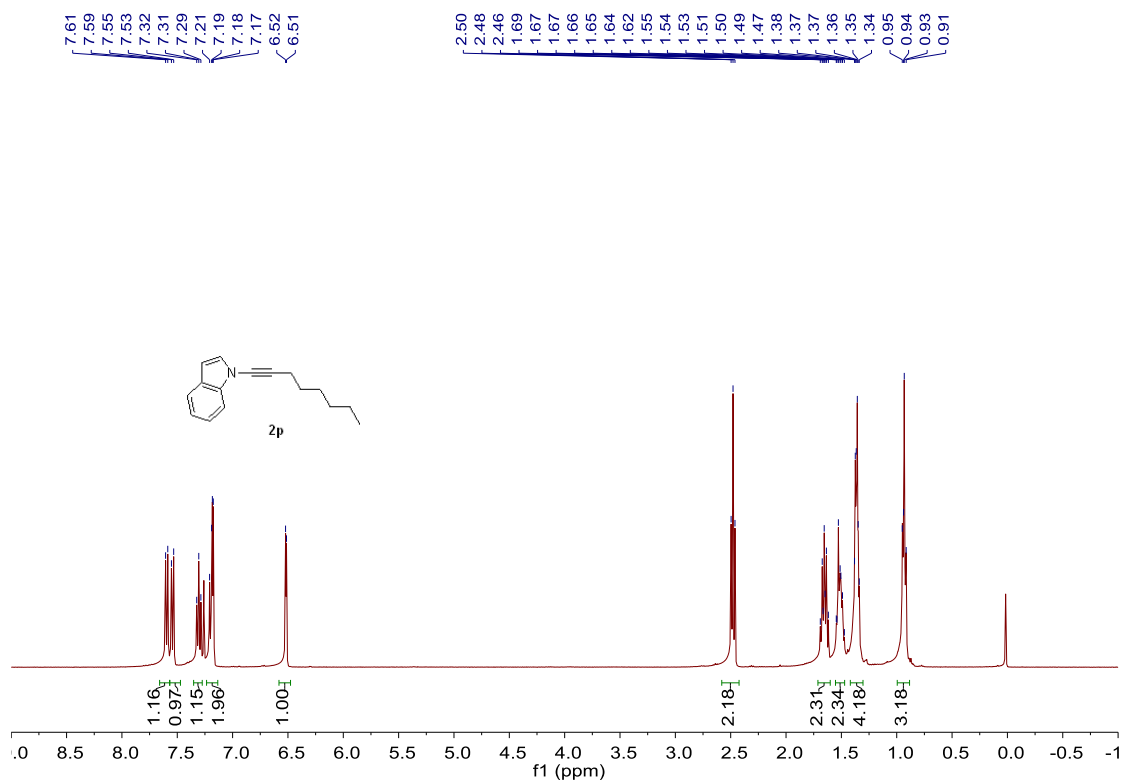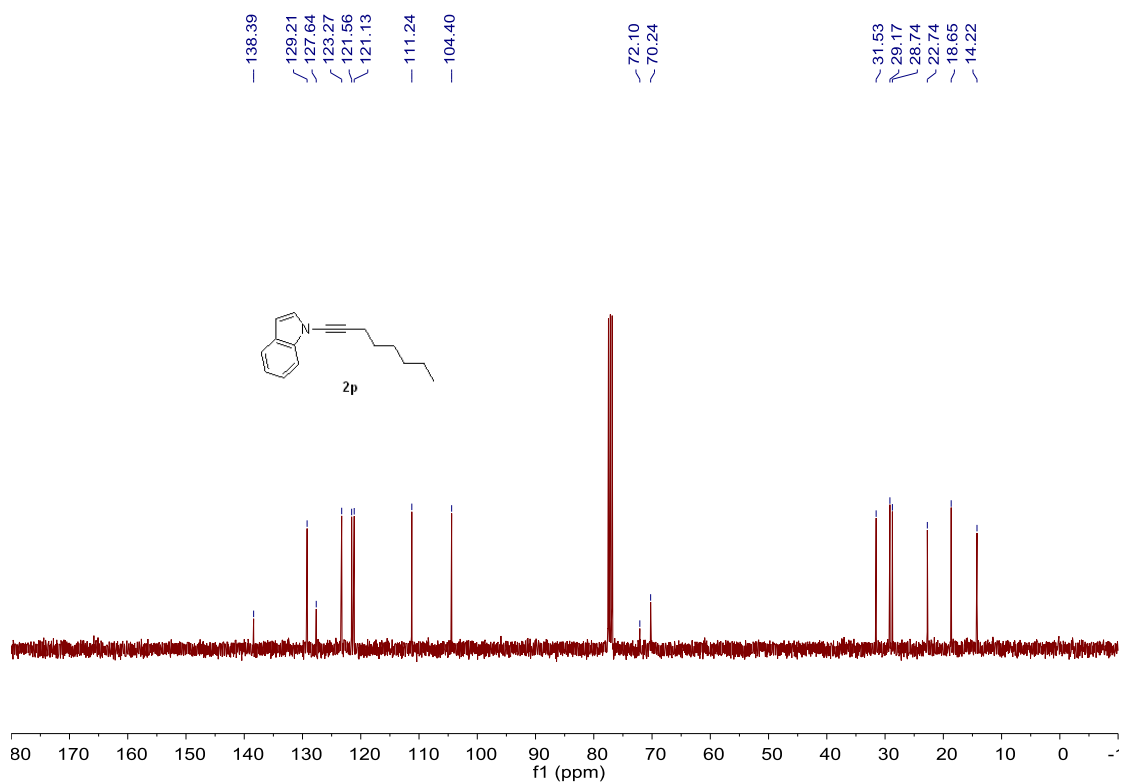

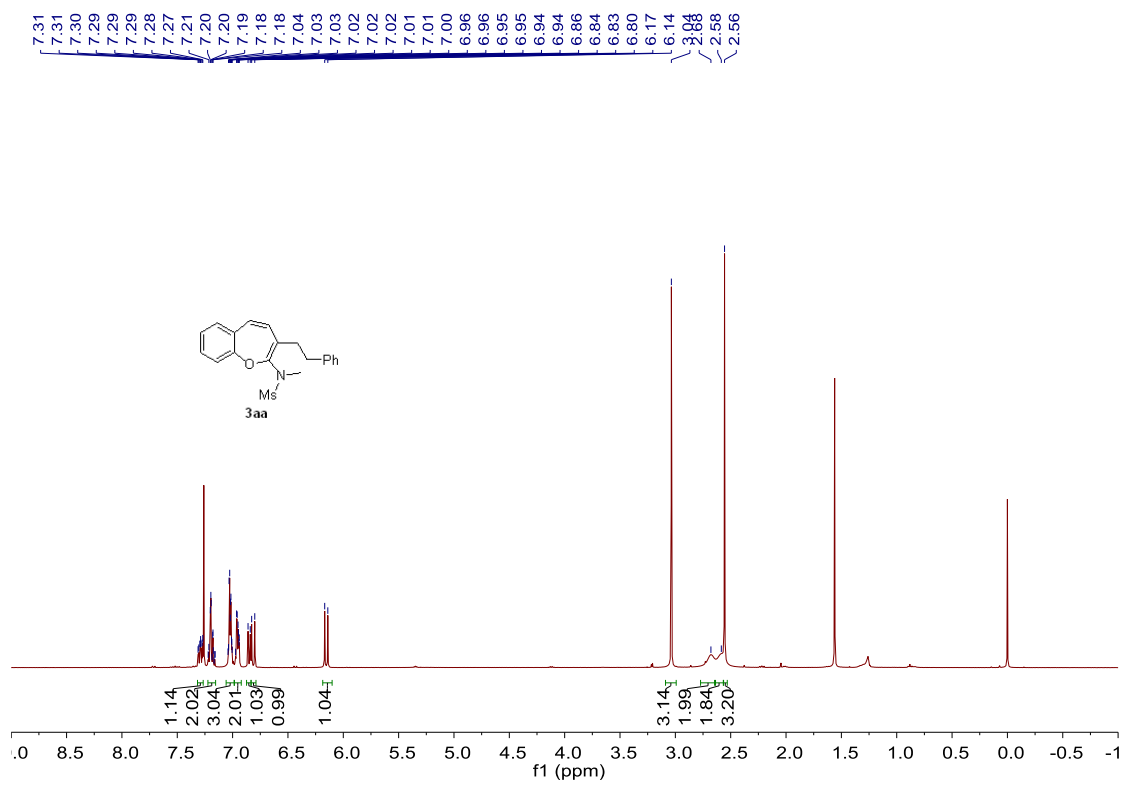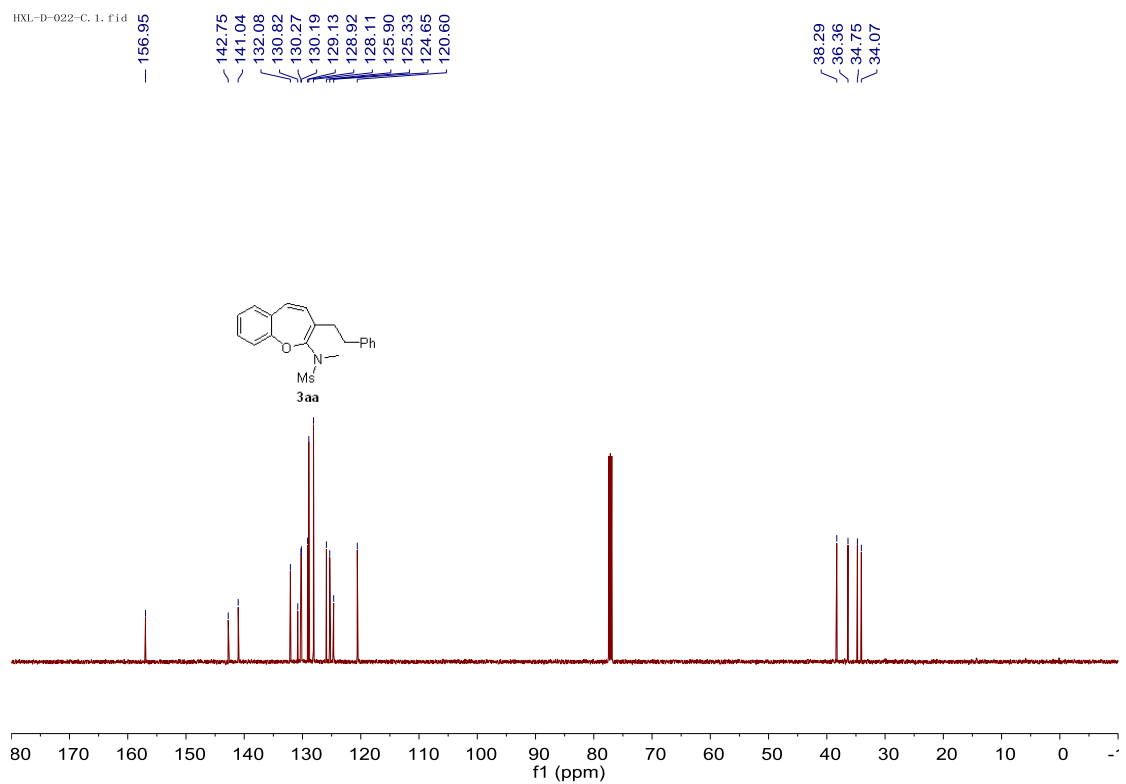

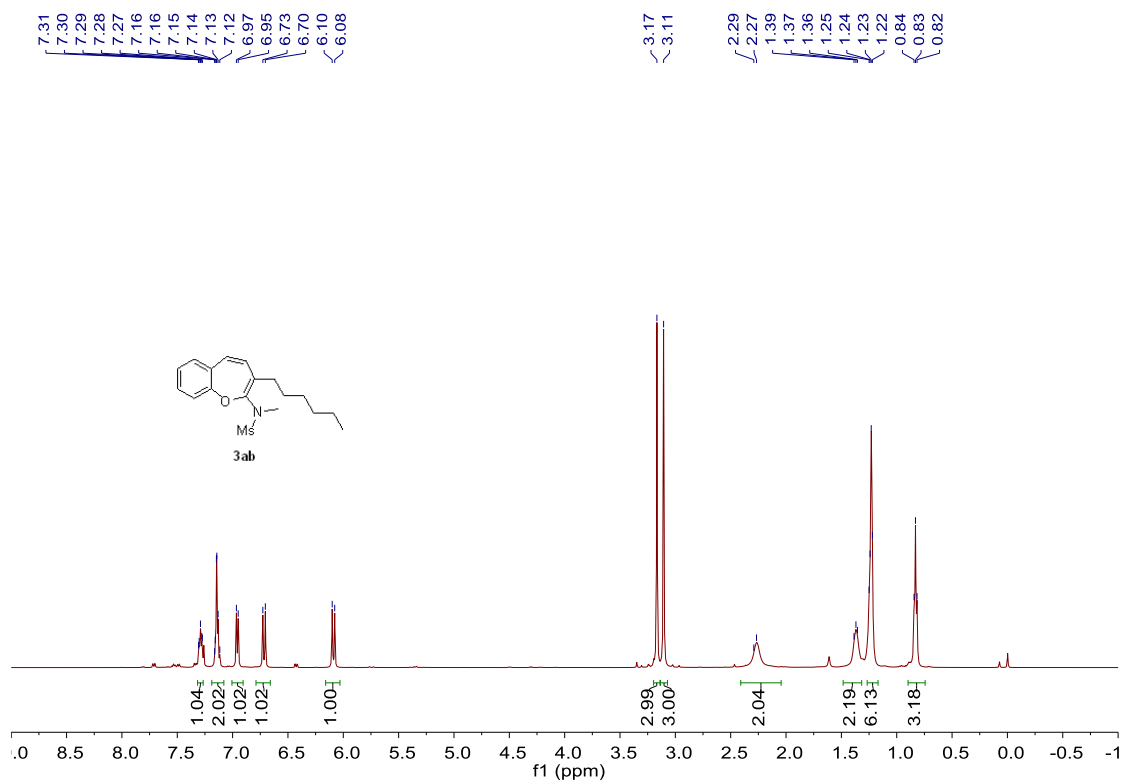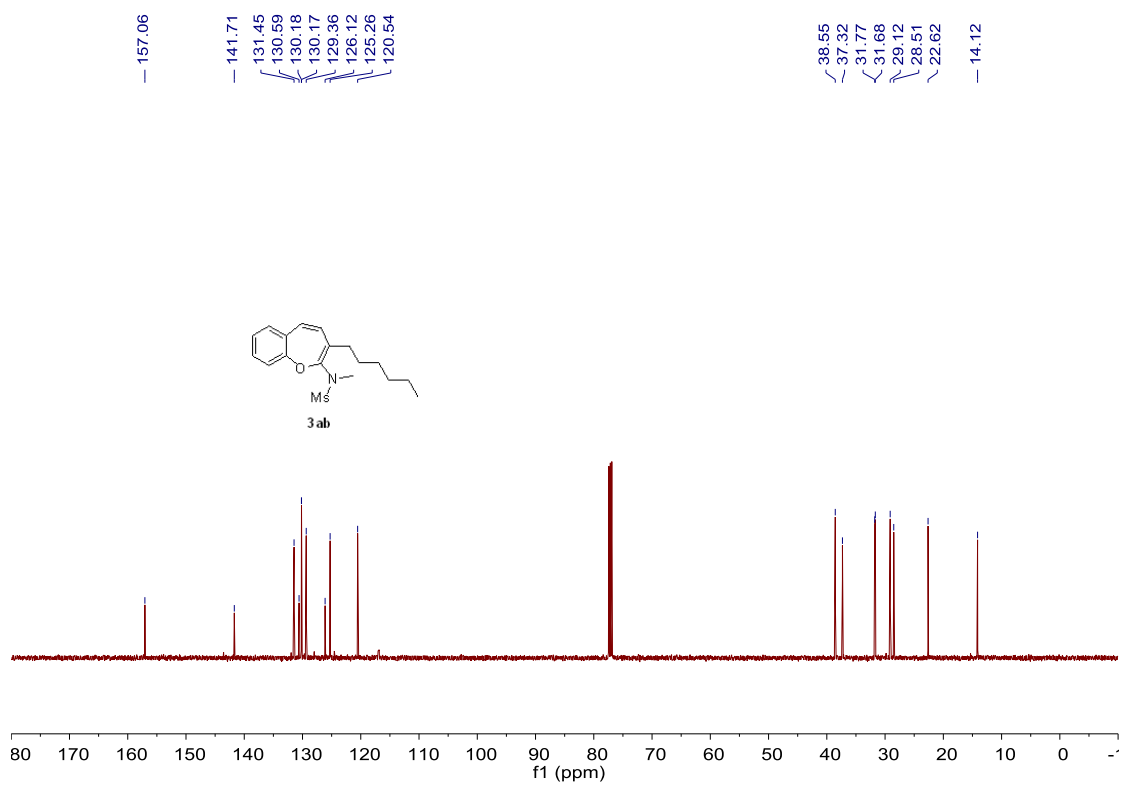

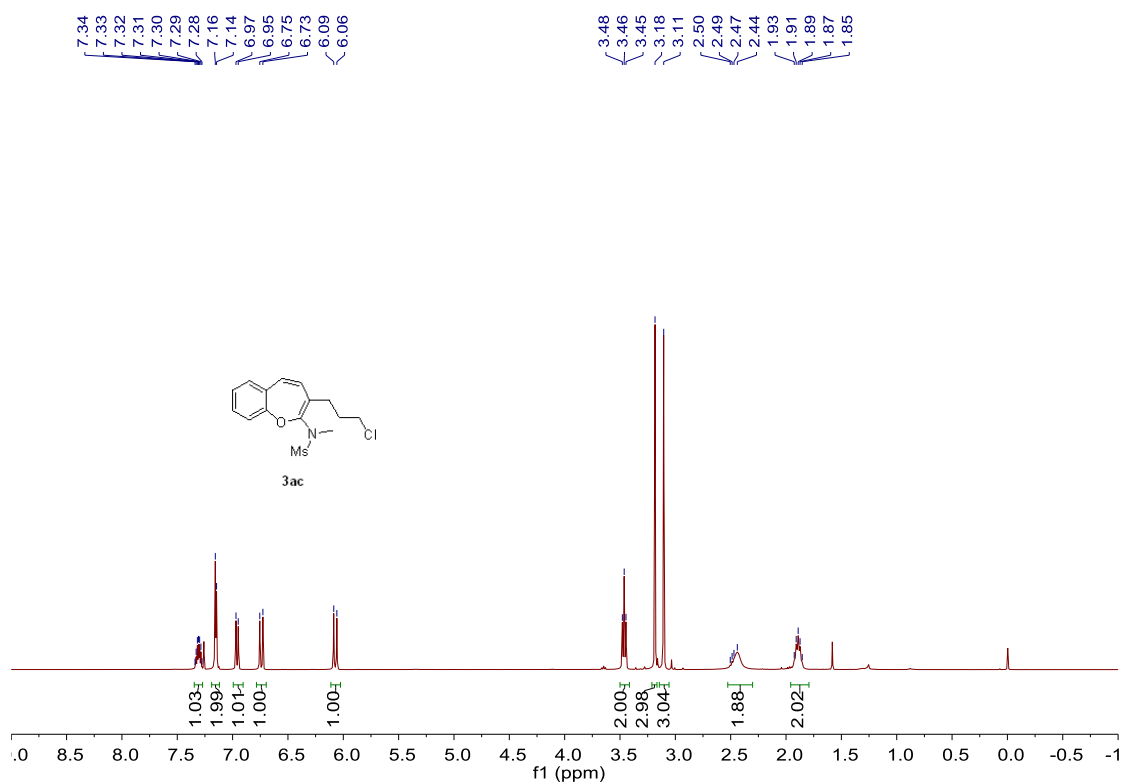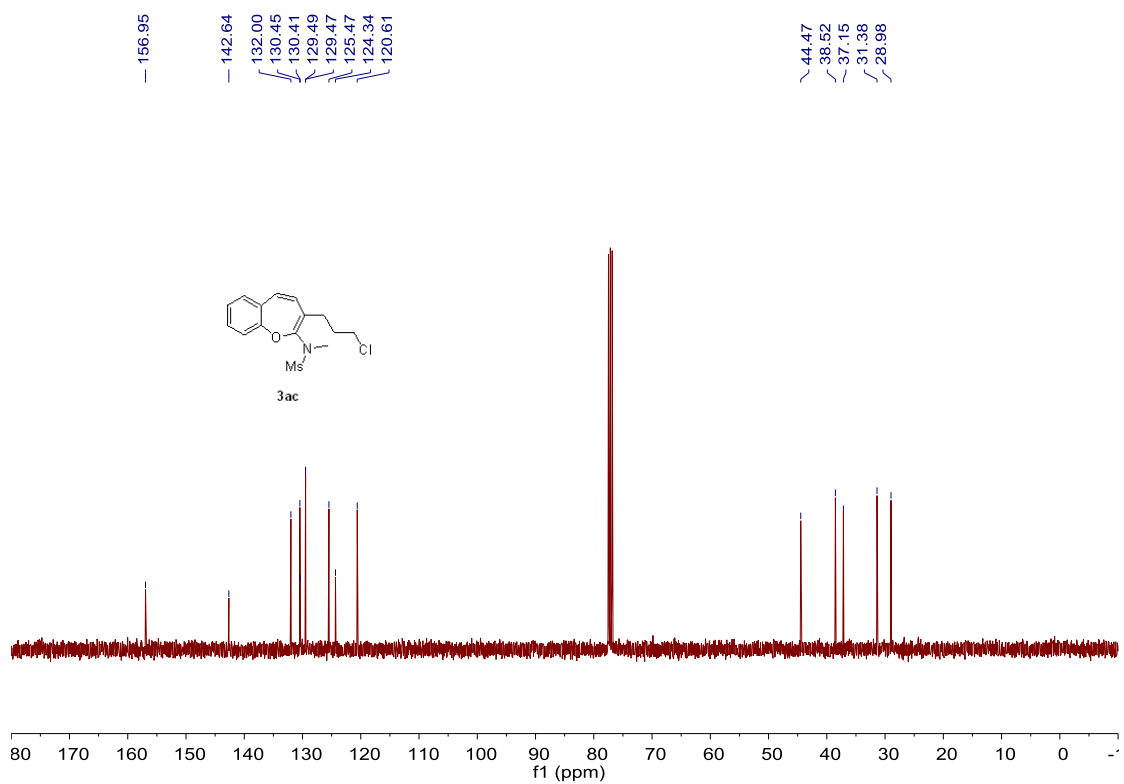



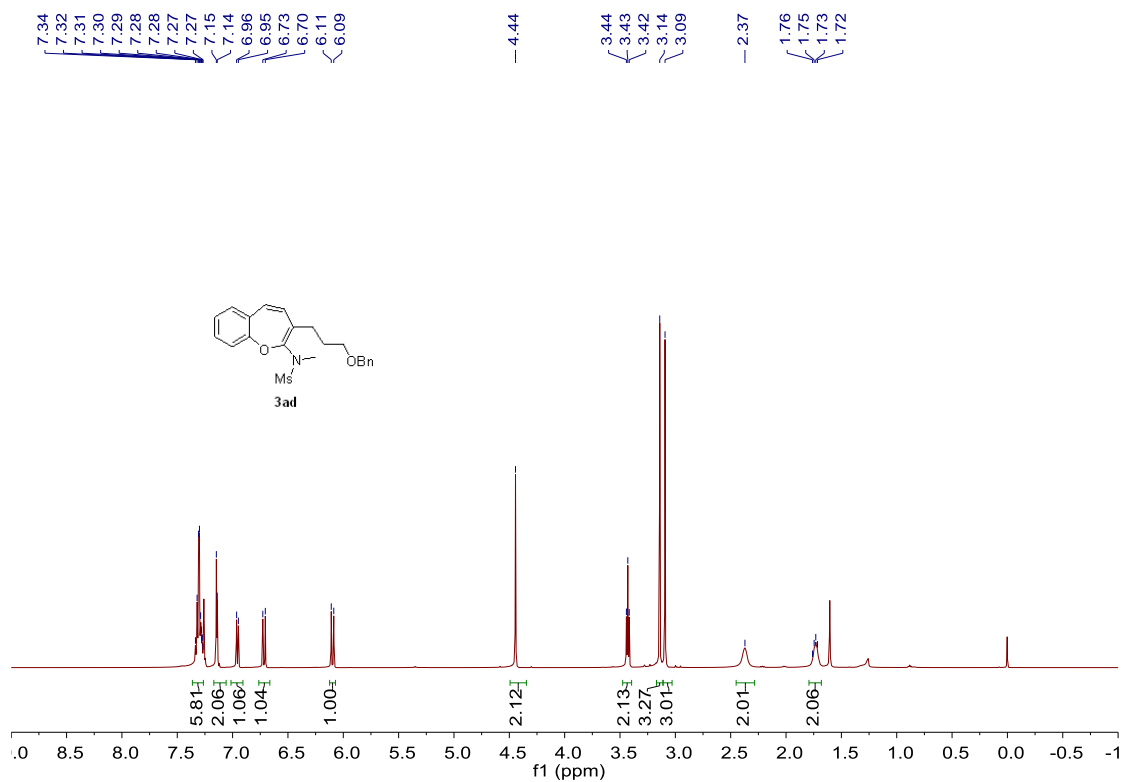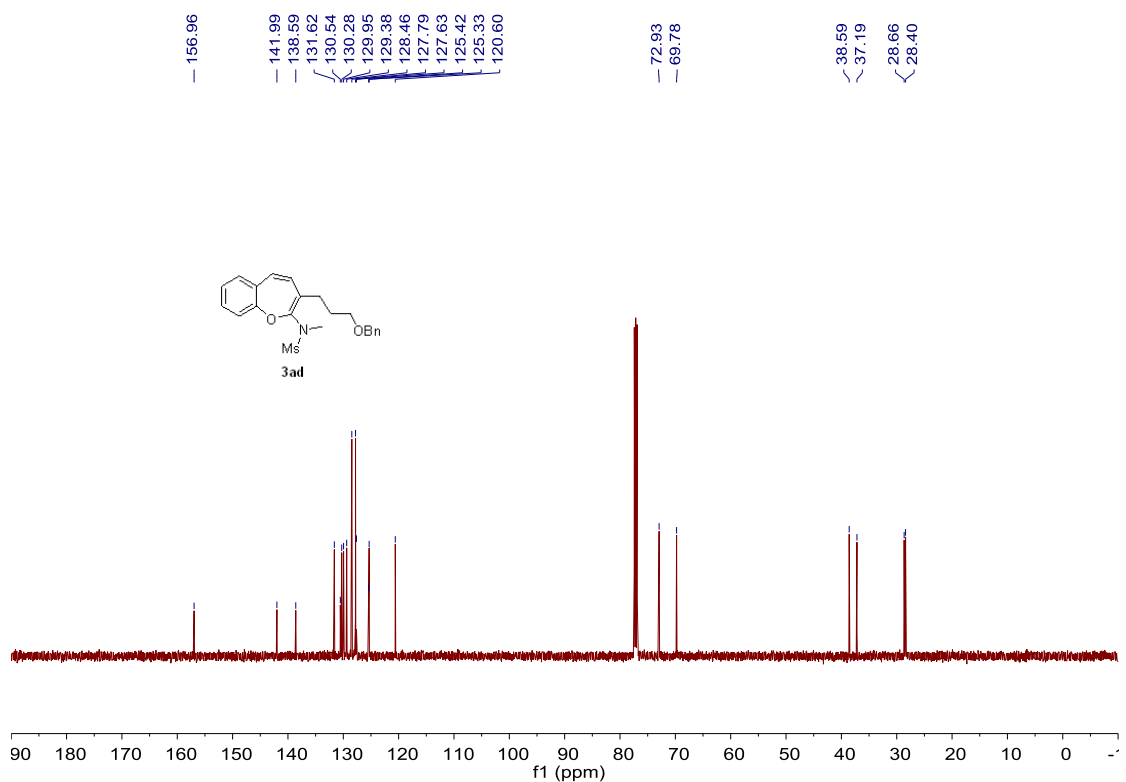

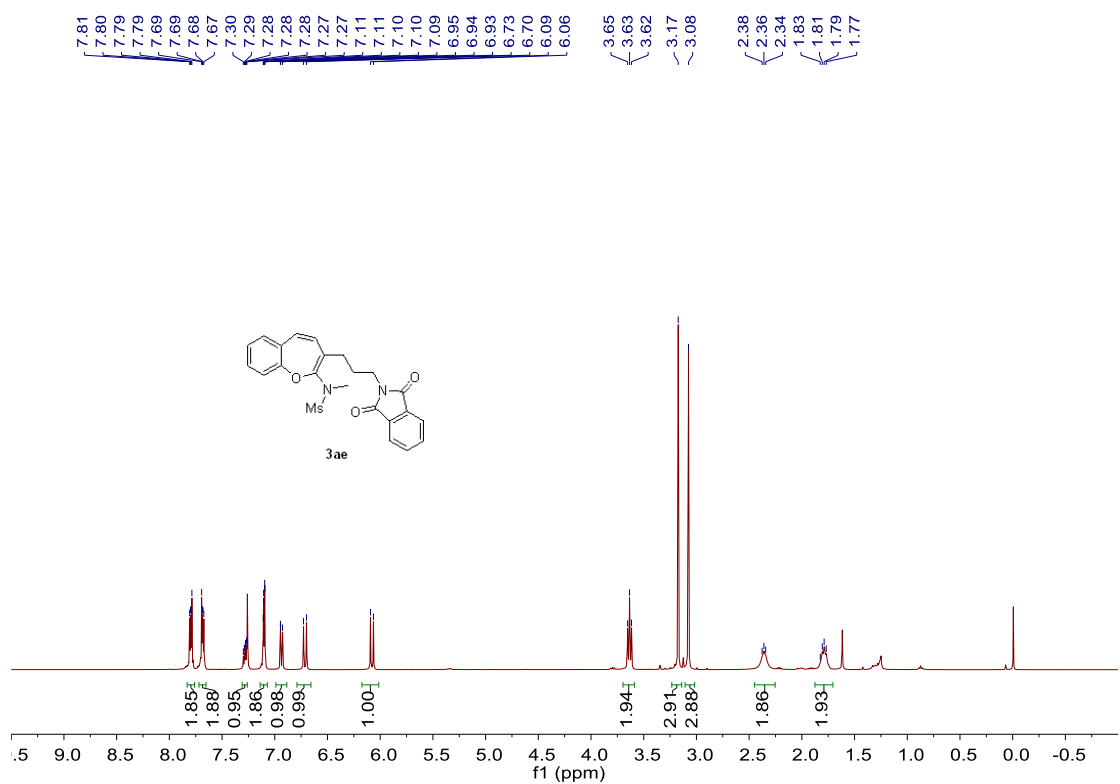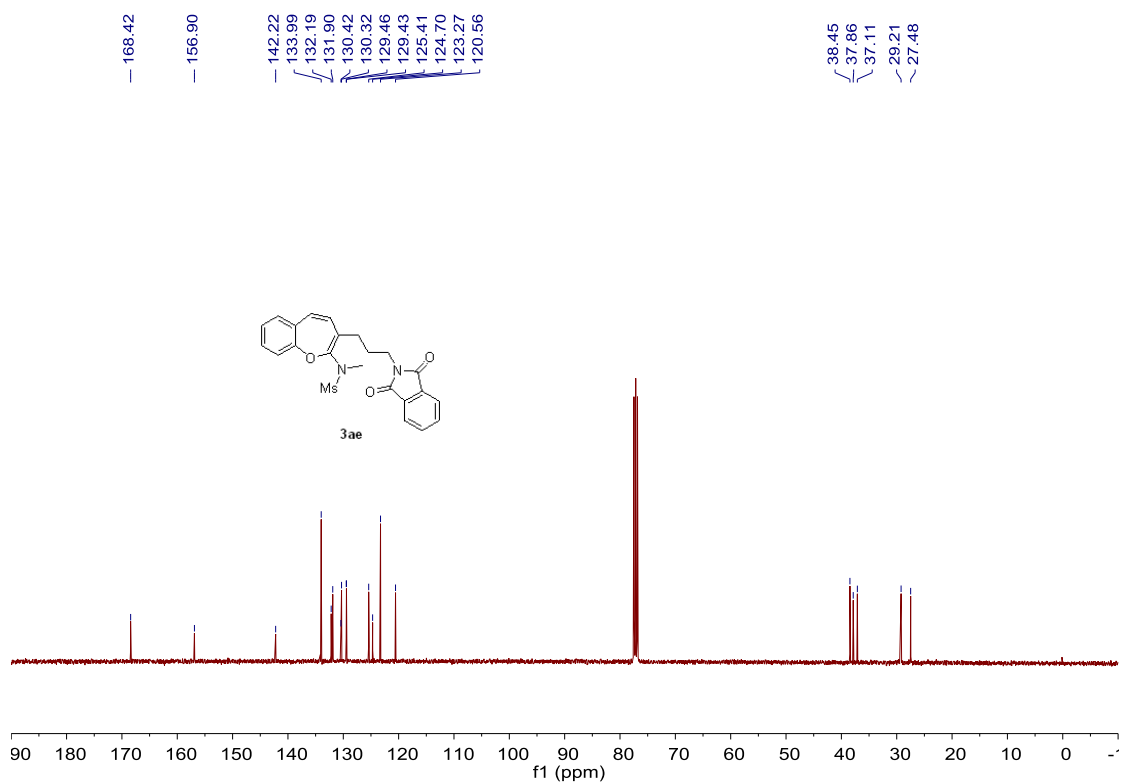

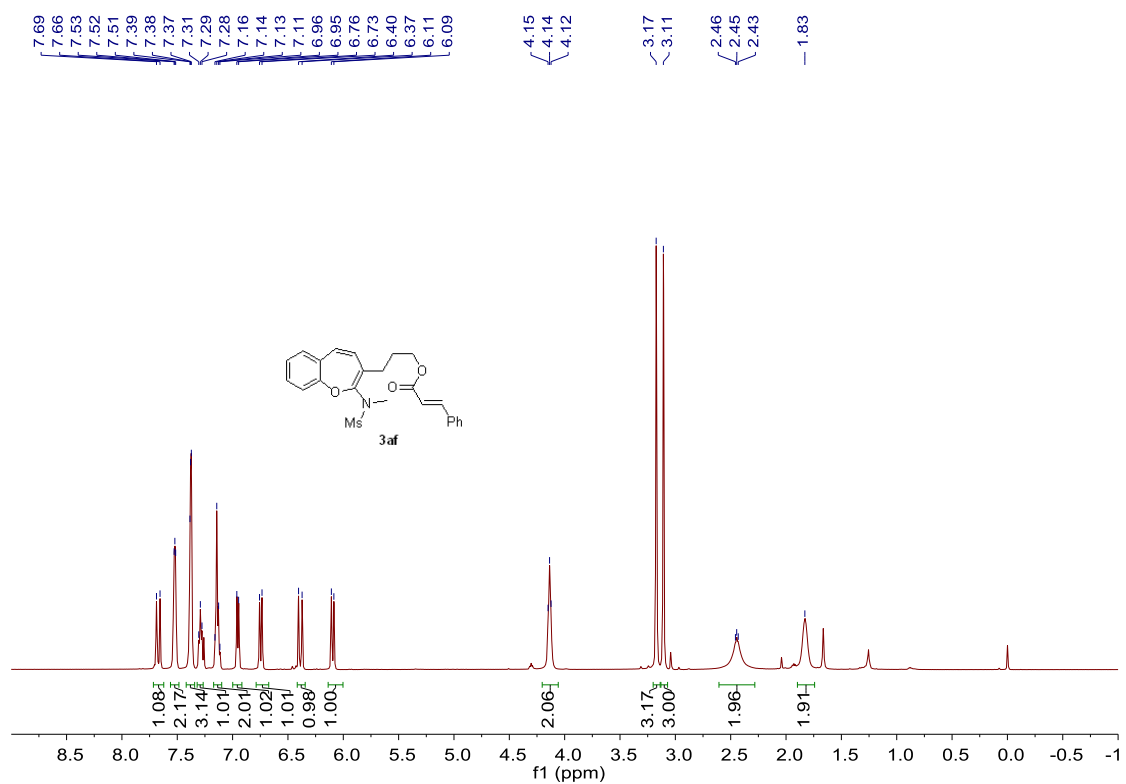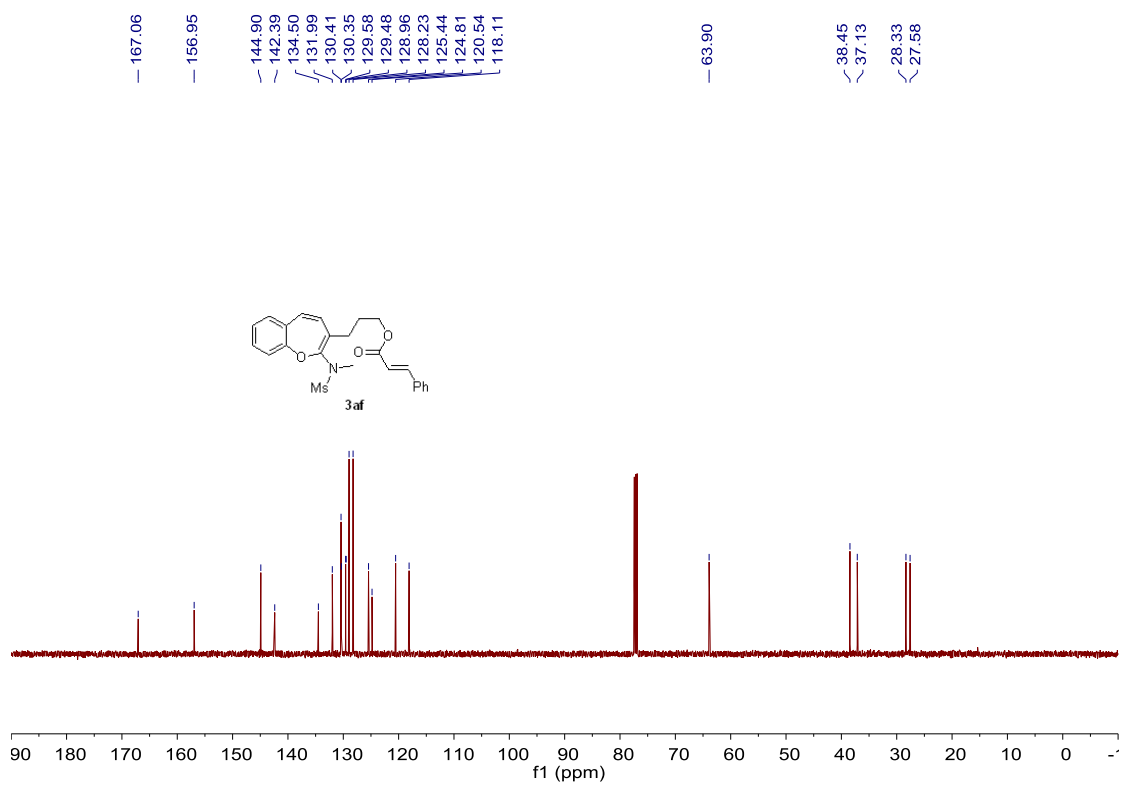

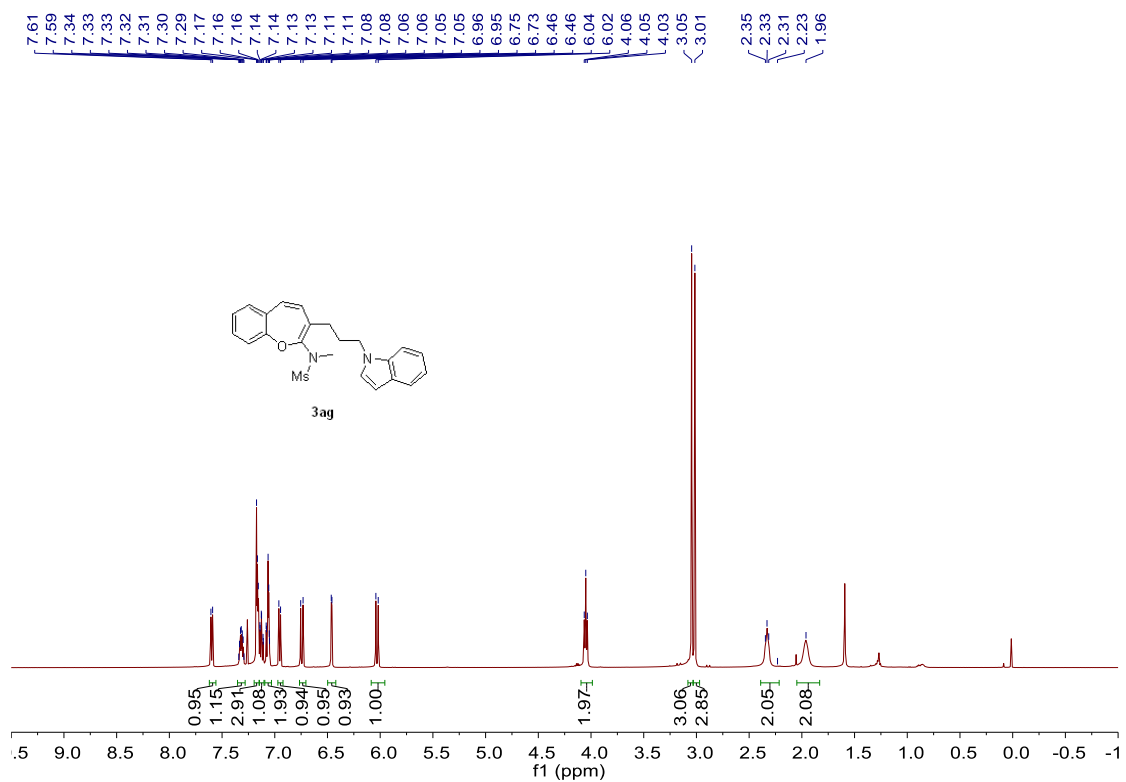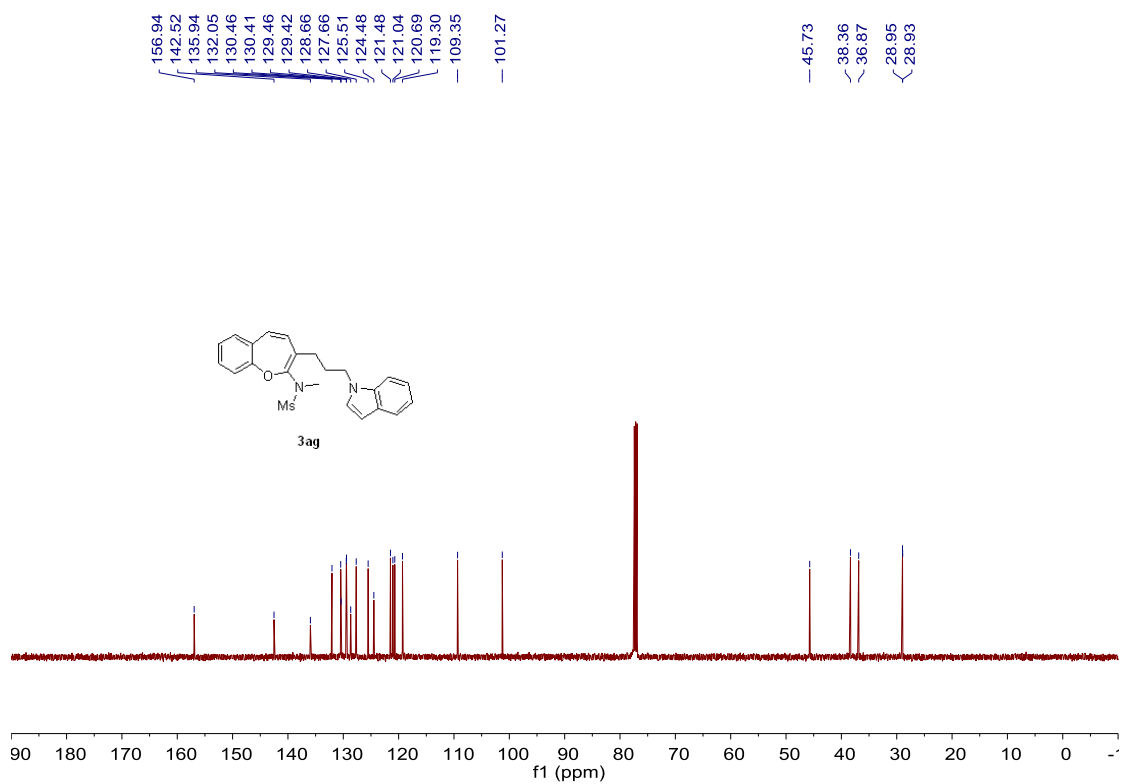

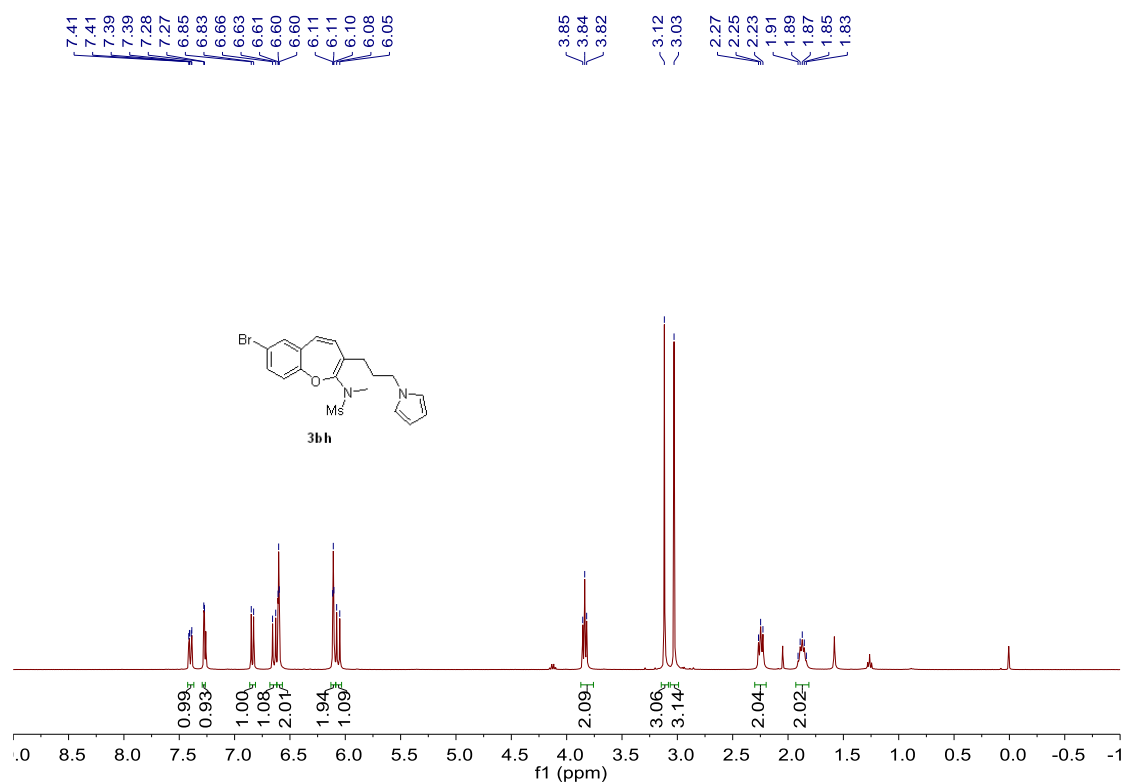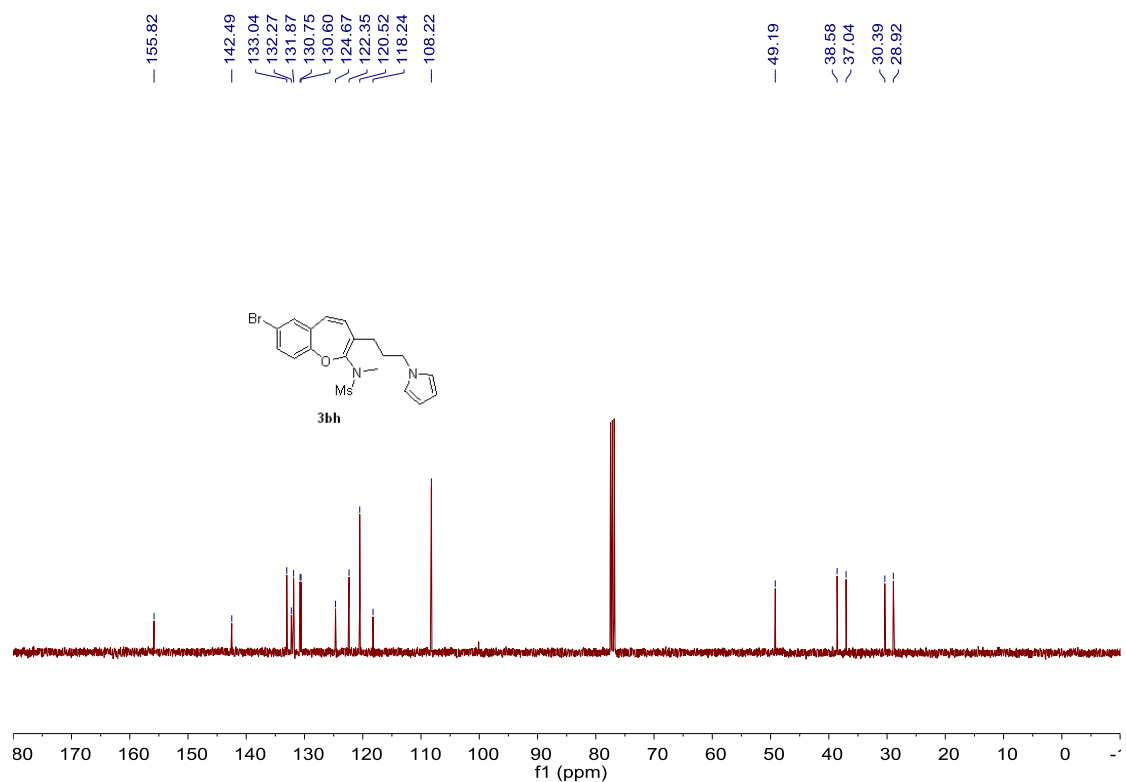

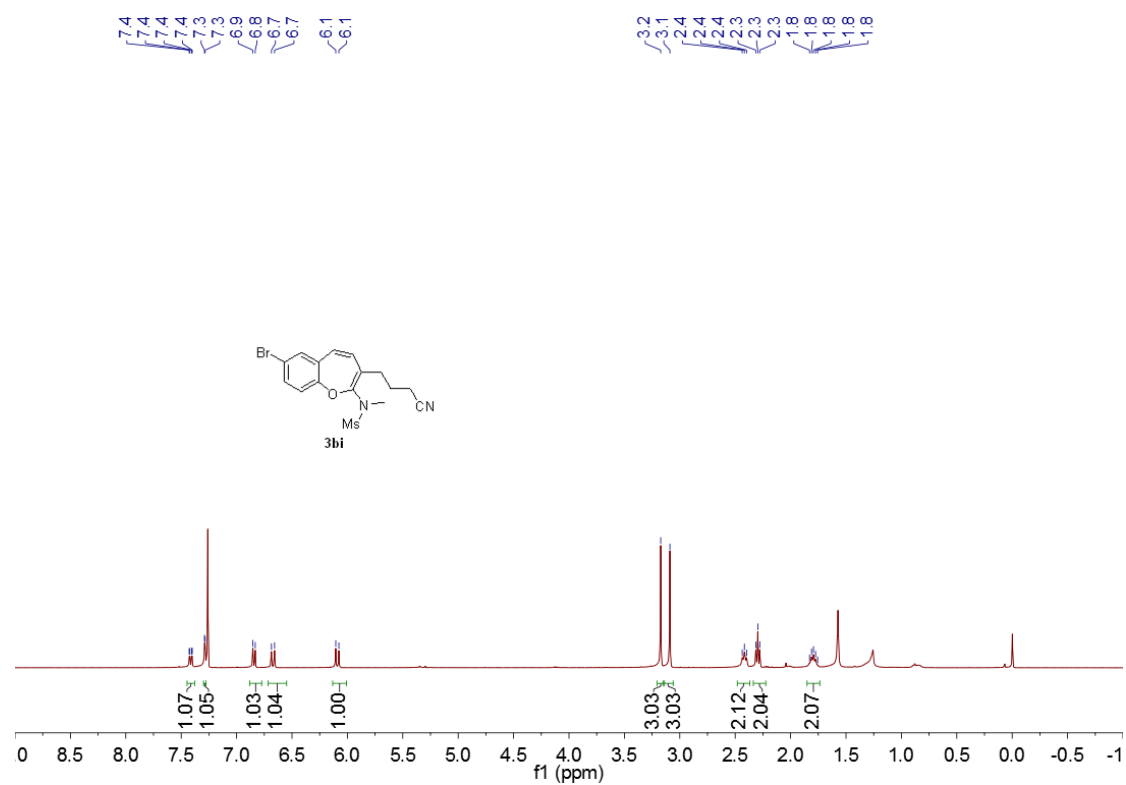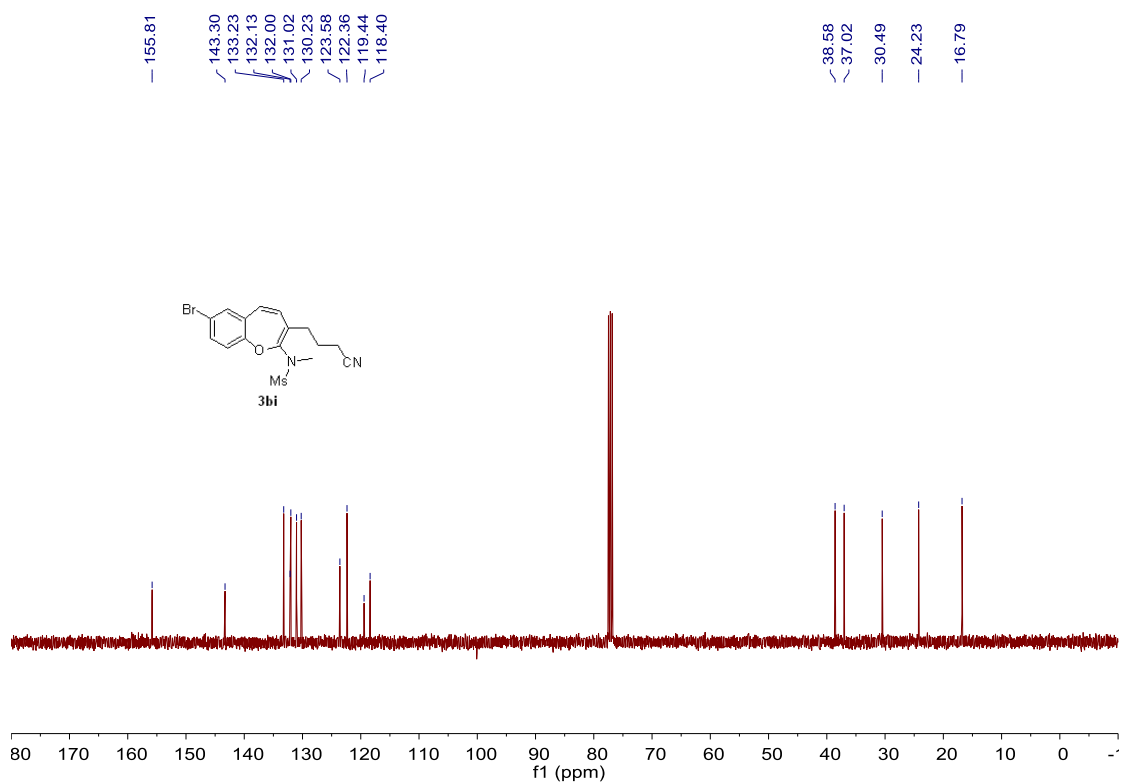

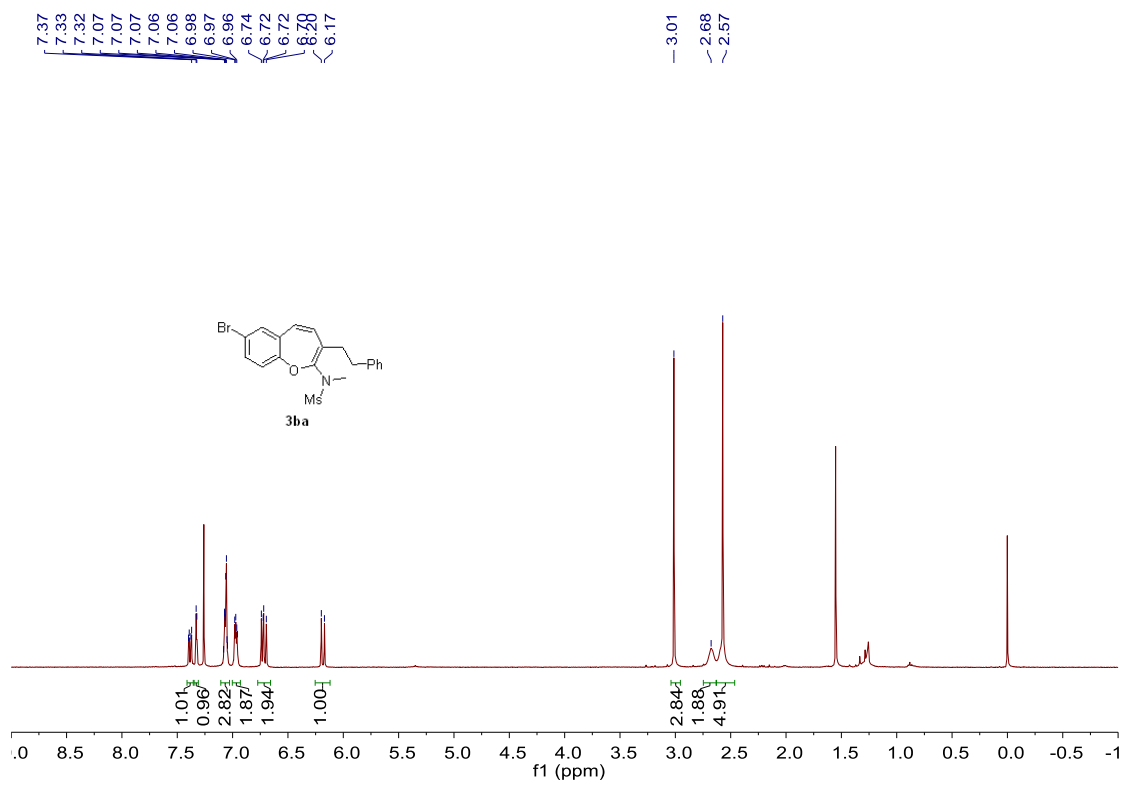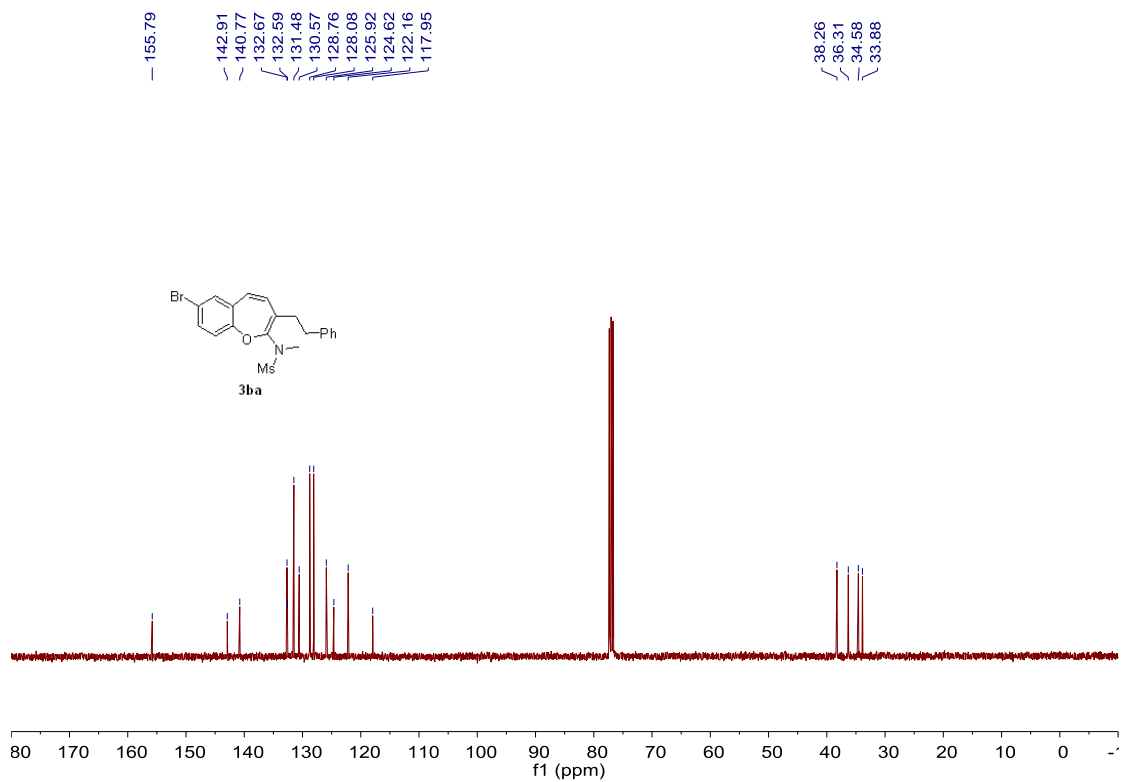

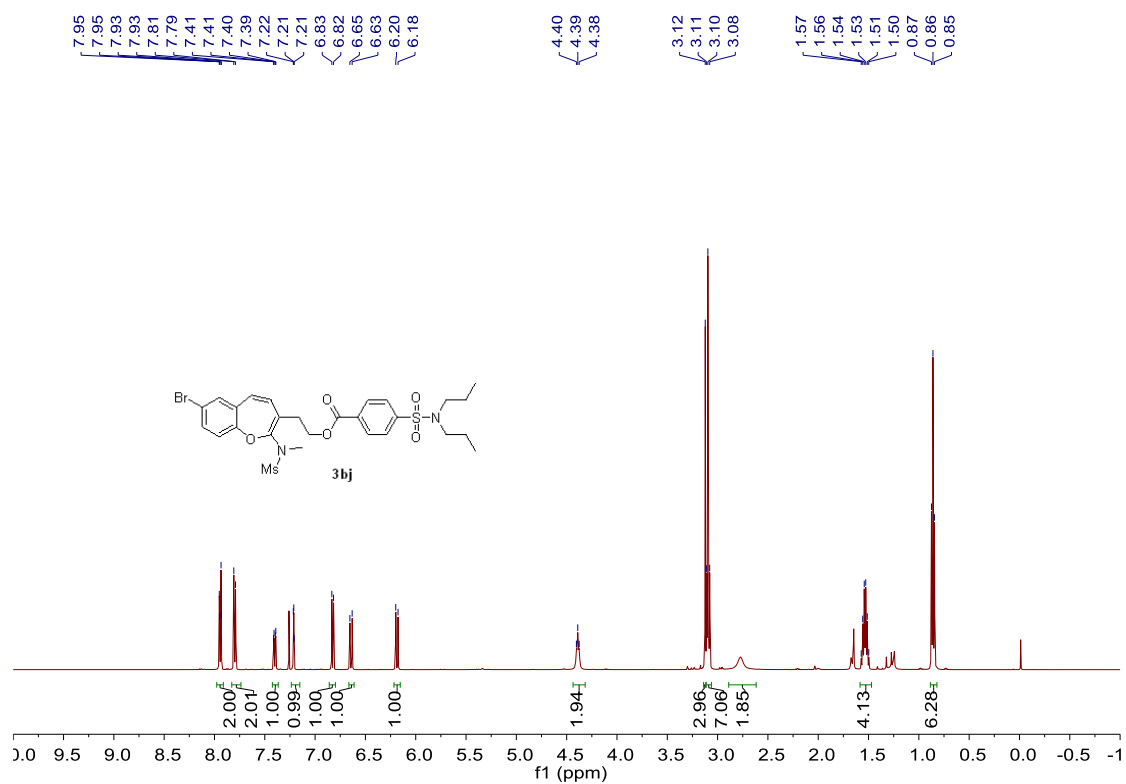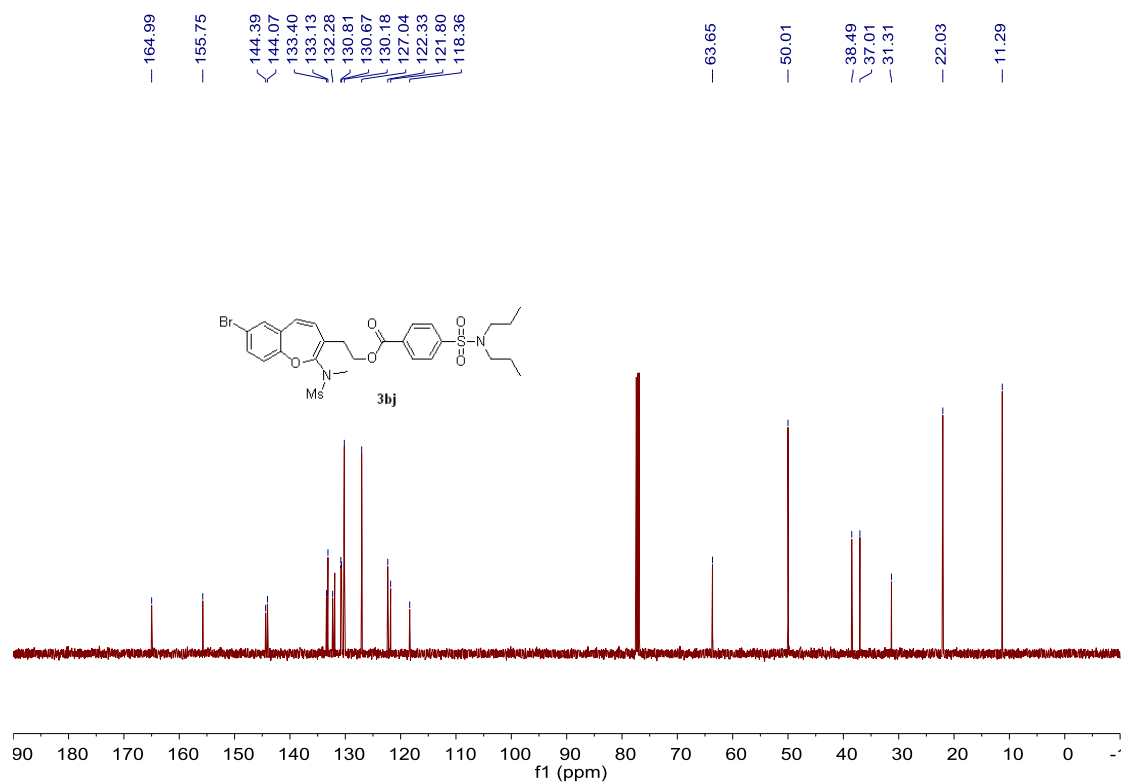



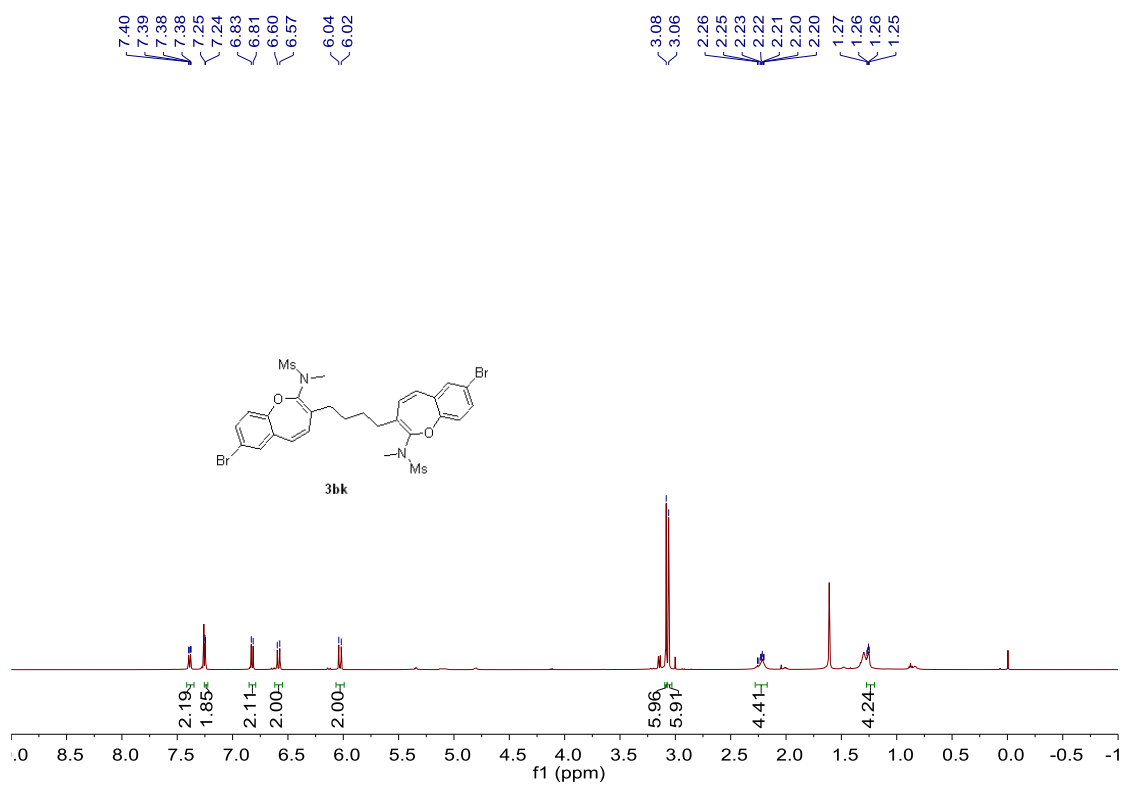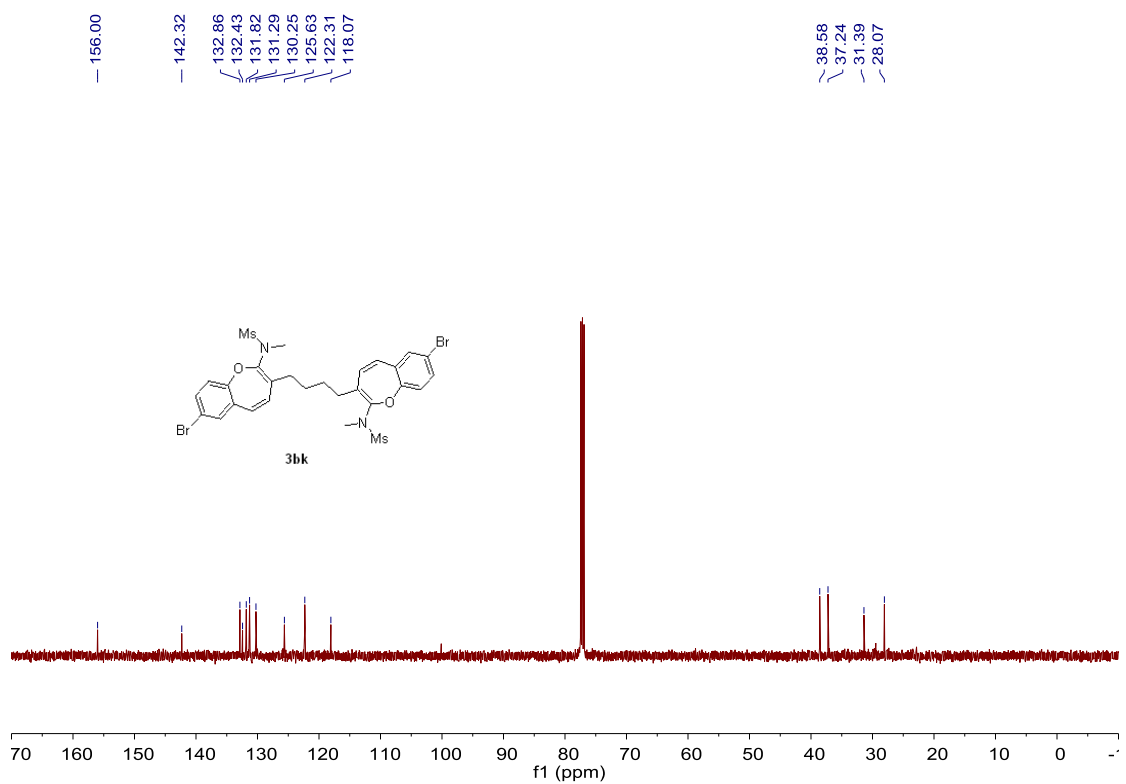

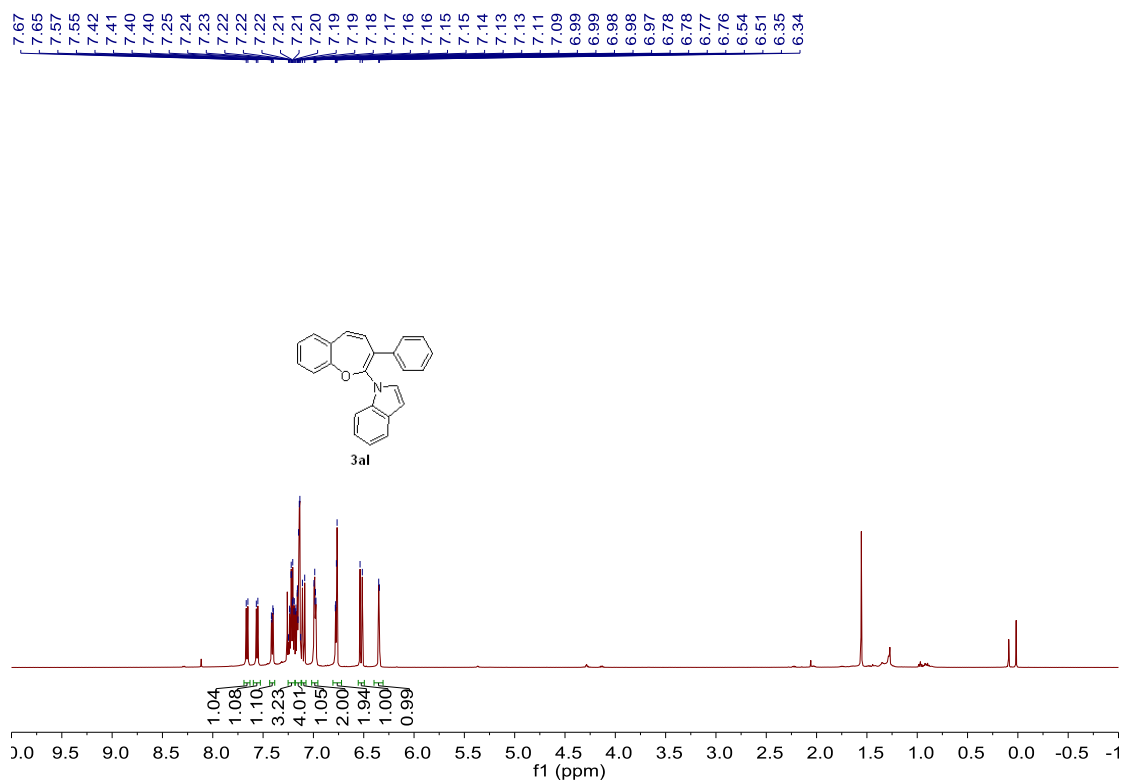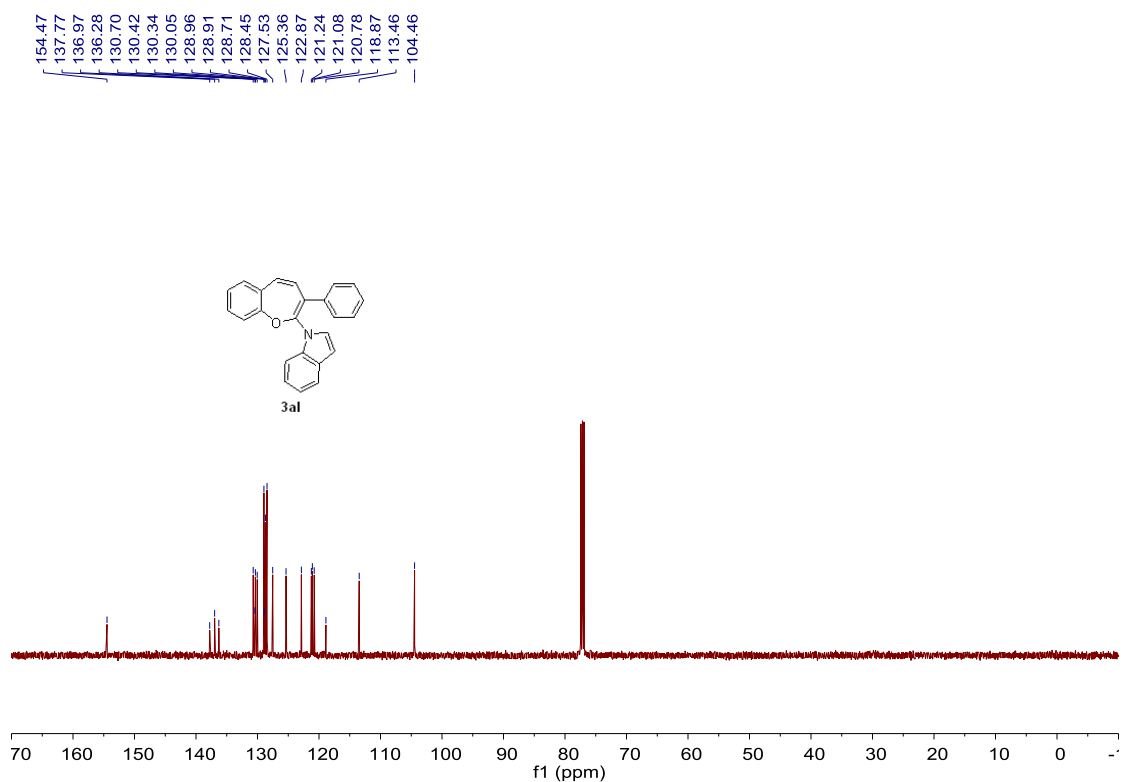

7.62  
7.61  
7.61  
7.60  
7.43  
7.42  
7.41  
7.41  
7.35  
7.34  
7.33  
7.33  
7.32  
7.31  
7.25  
7.23  
7.23  
7.22  
7.22  
7.21  
7.20  
7.18  
7.17  
7.16  
7.14  
7.13  
7.12  
7.11  
7.10  
7.09  
7.07  
7.00  
6.99  
6.90  
6.89  
6.54  
6.54  
6.42  
6.40

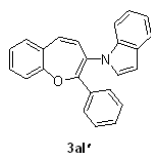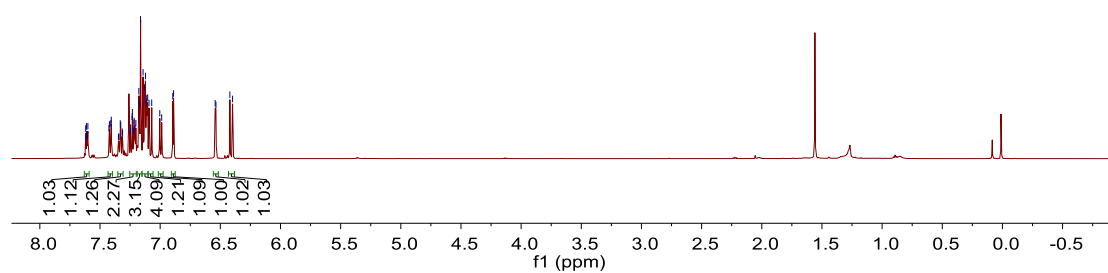

155.11  
147.20  
135.98  
133.32  
132.03  
131.25  
131.19  
129.37  
129.19  
129.08  
128.77  
128.60  
128.19  
127.88  
126.09  
125.26  
122.32  
121.36  
120.92  
120.48  
111.42  
104.12

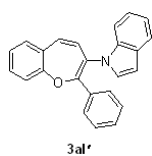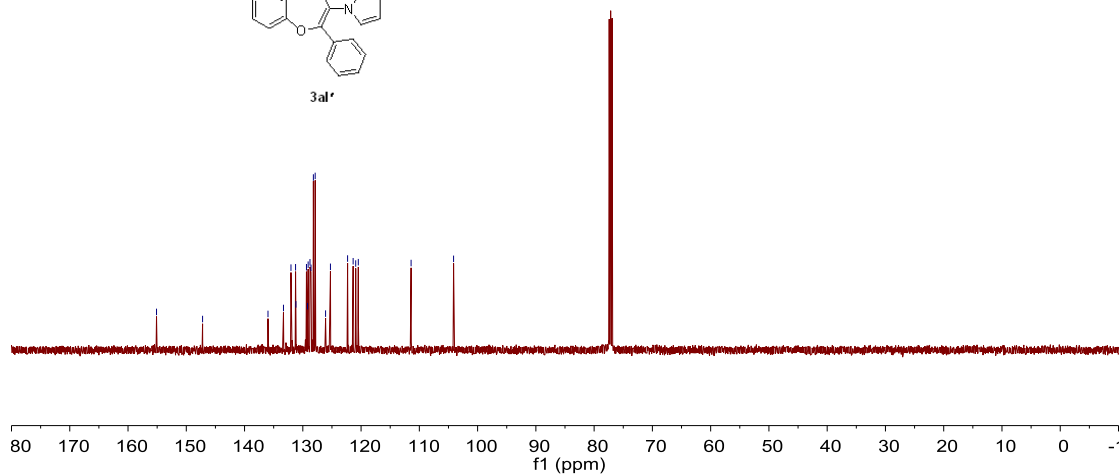

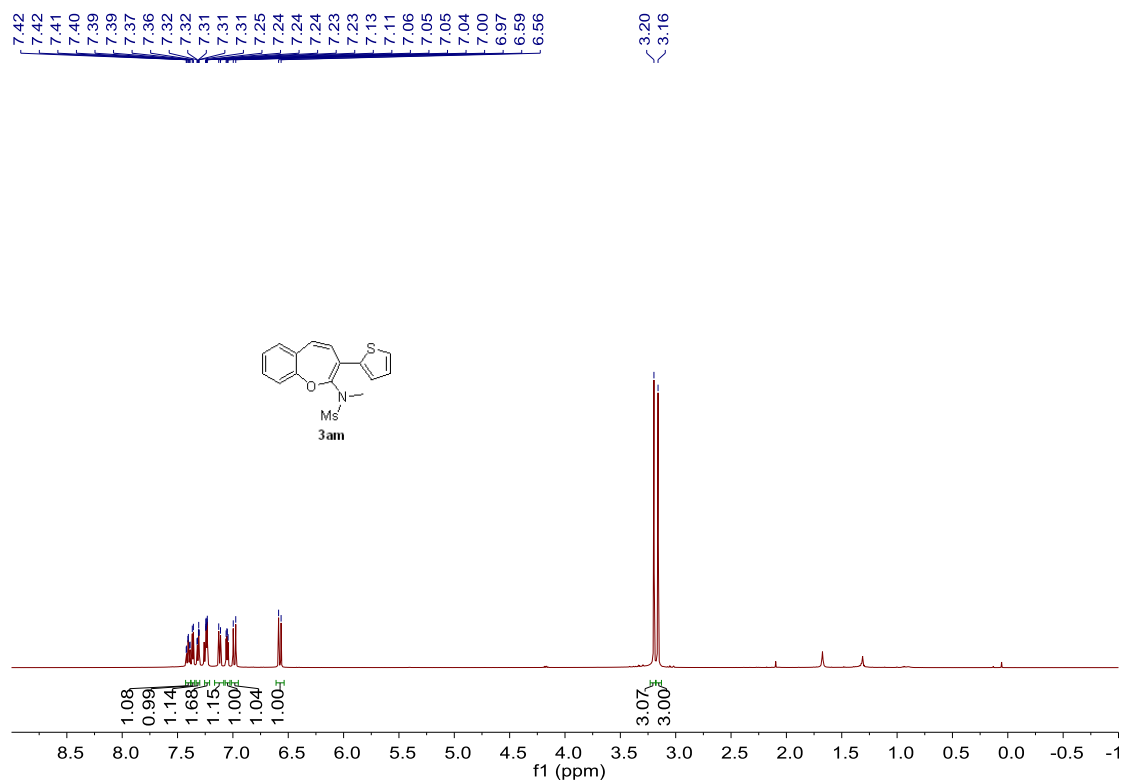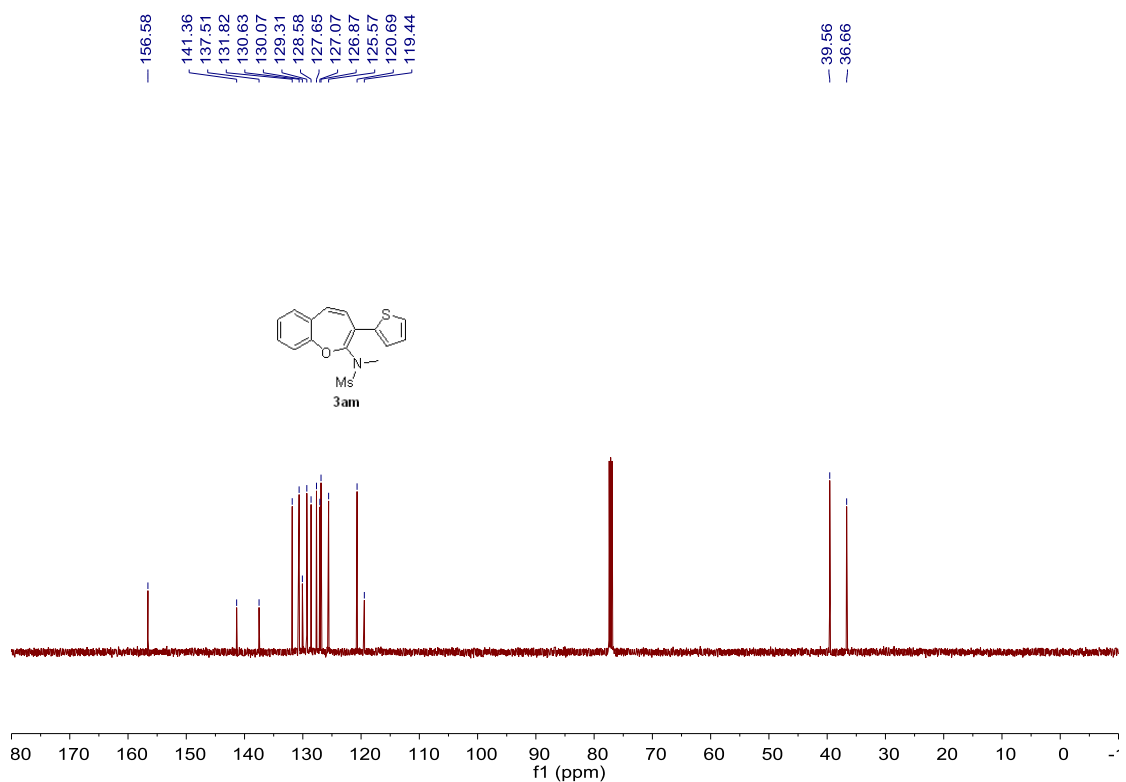

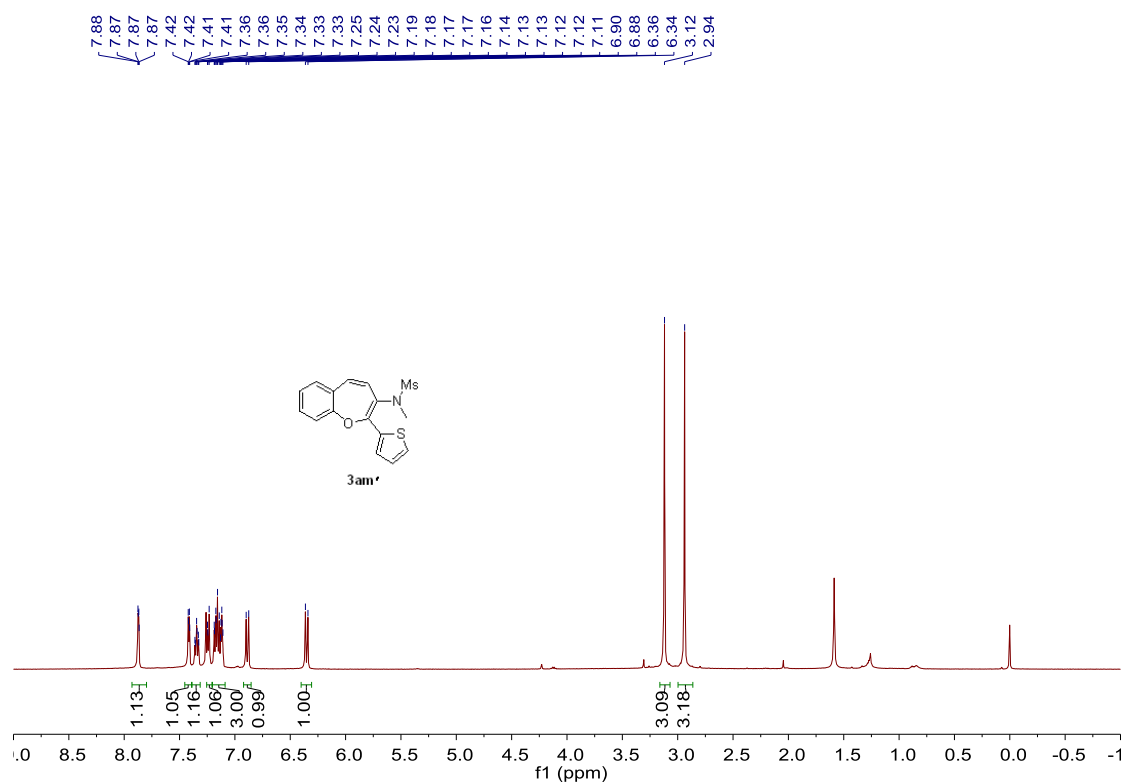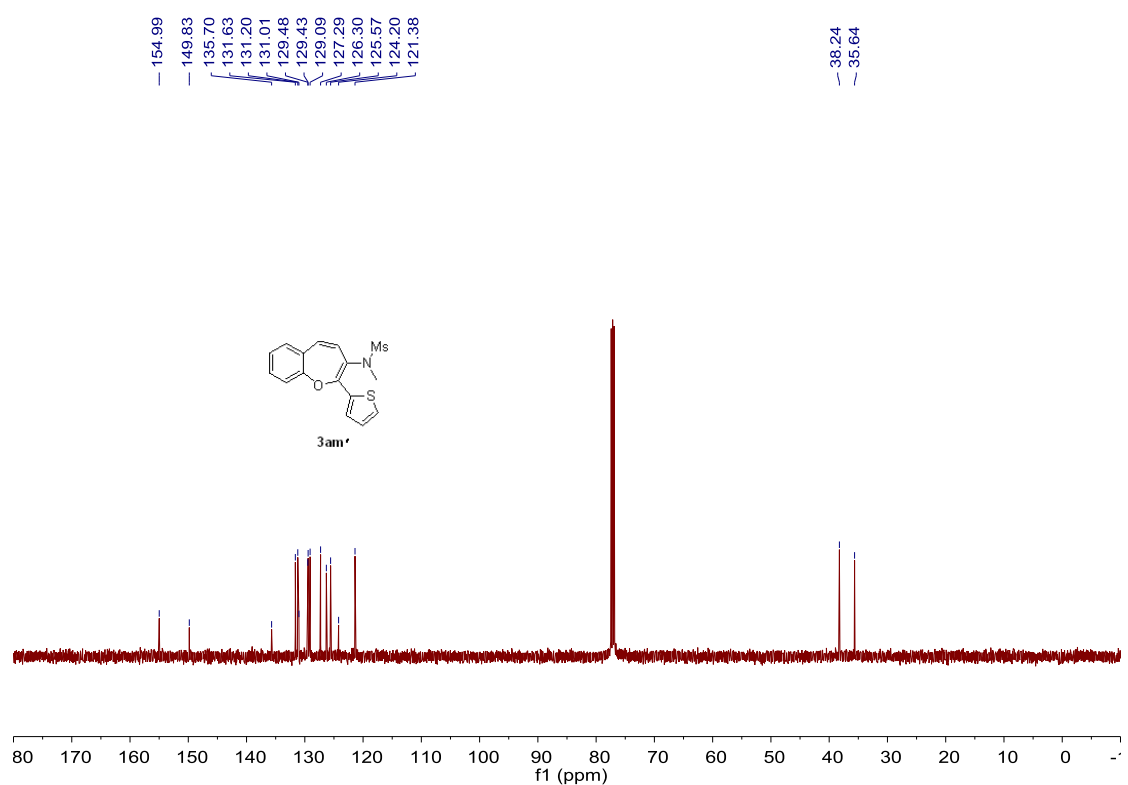

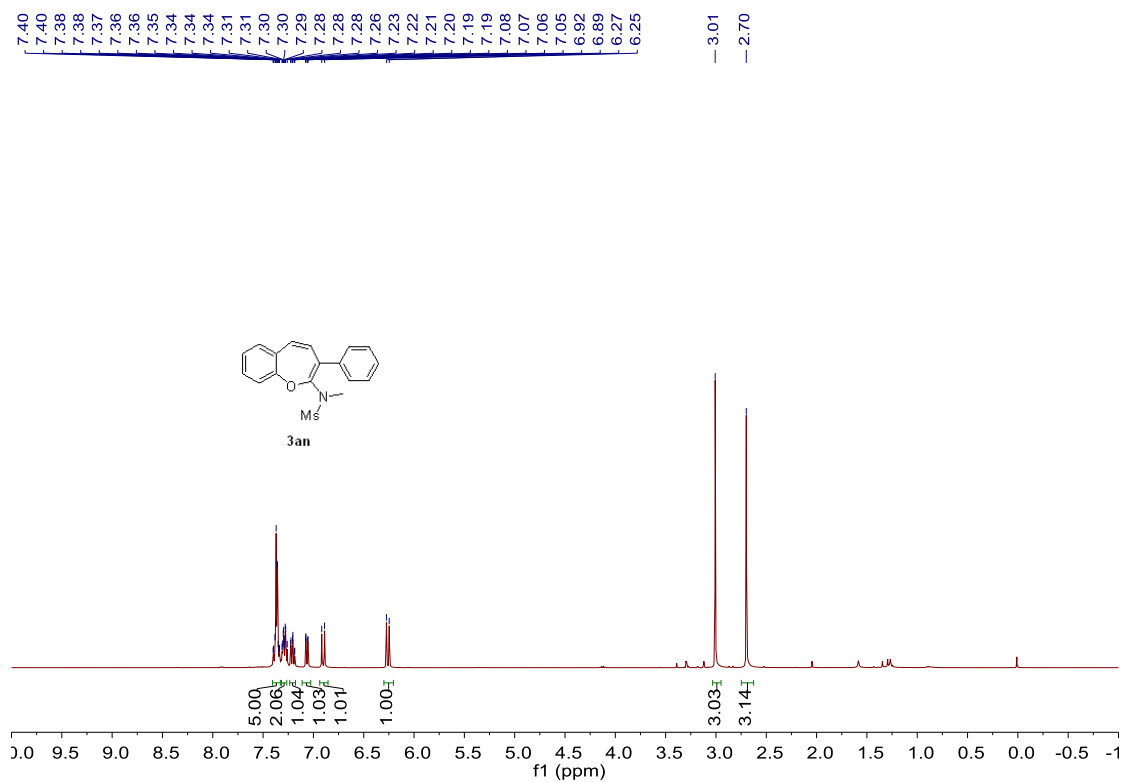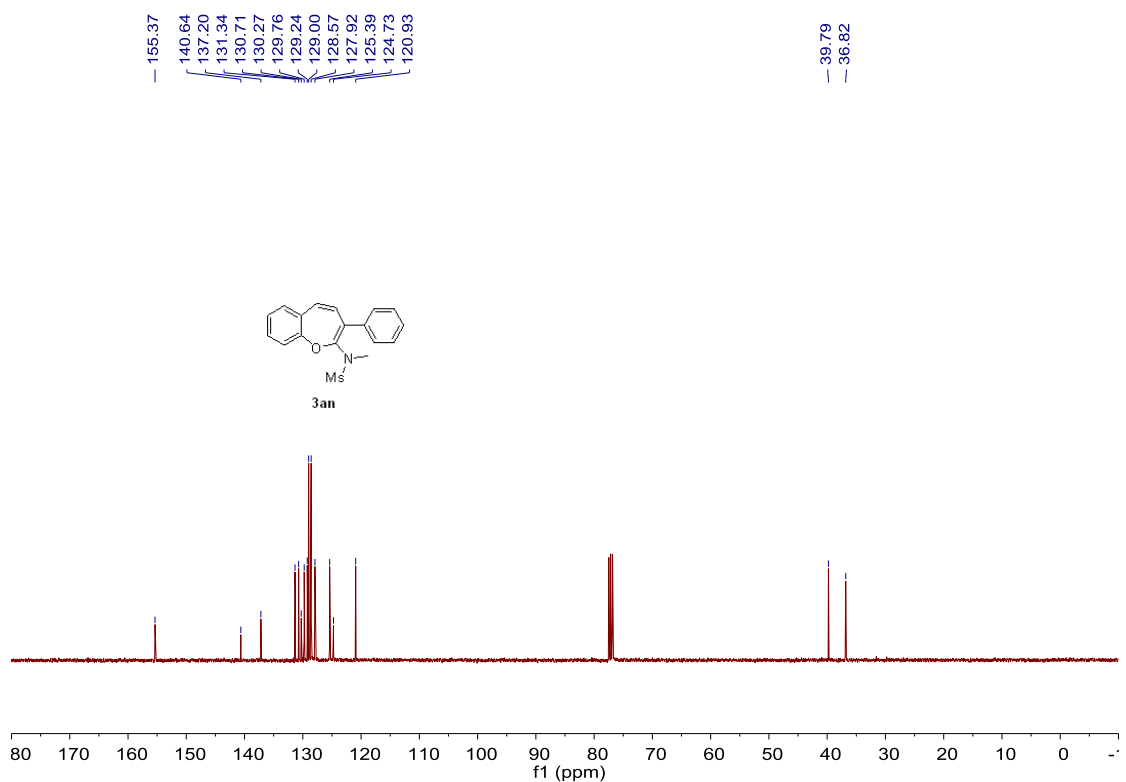

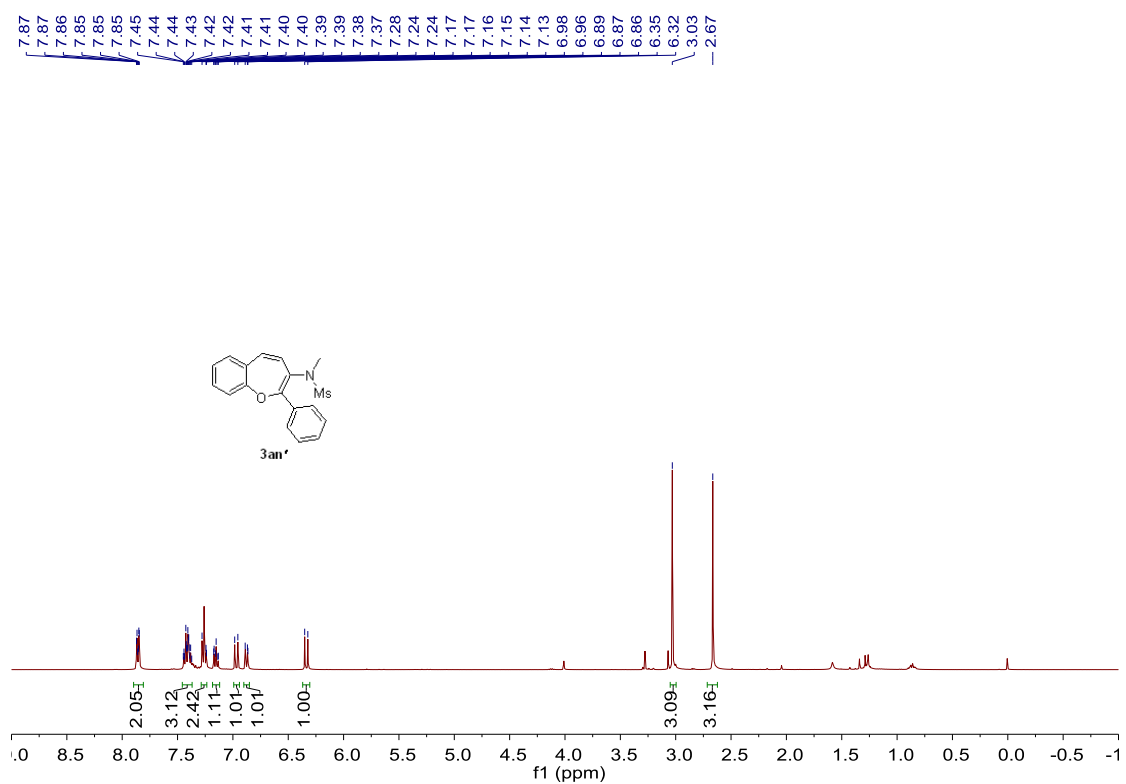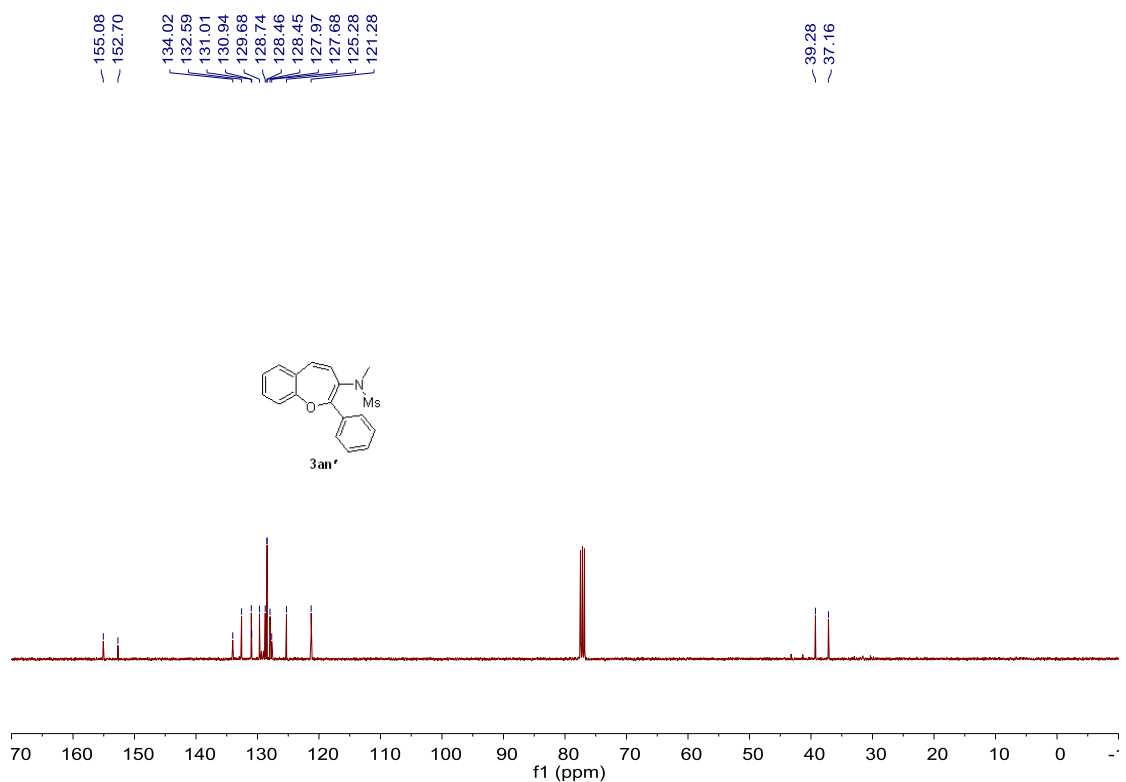

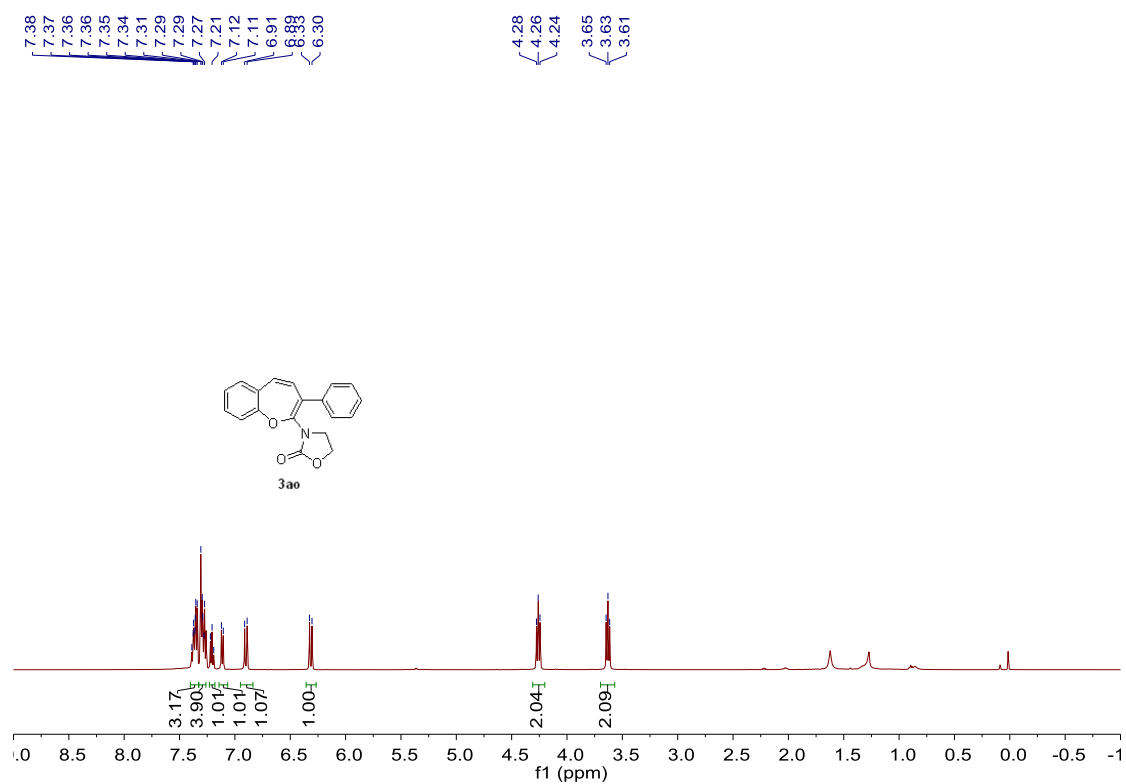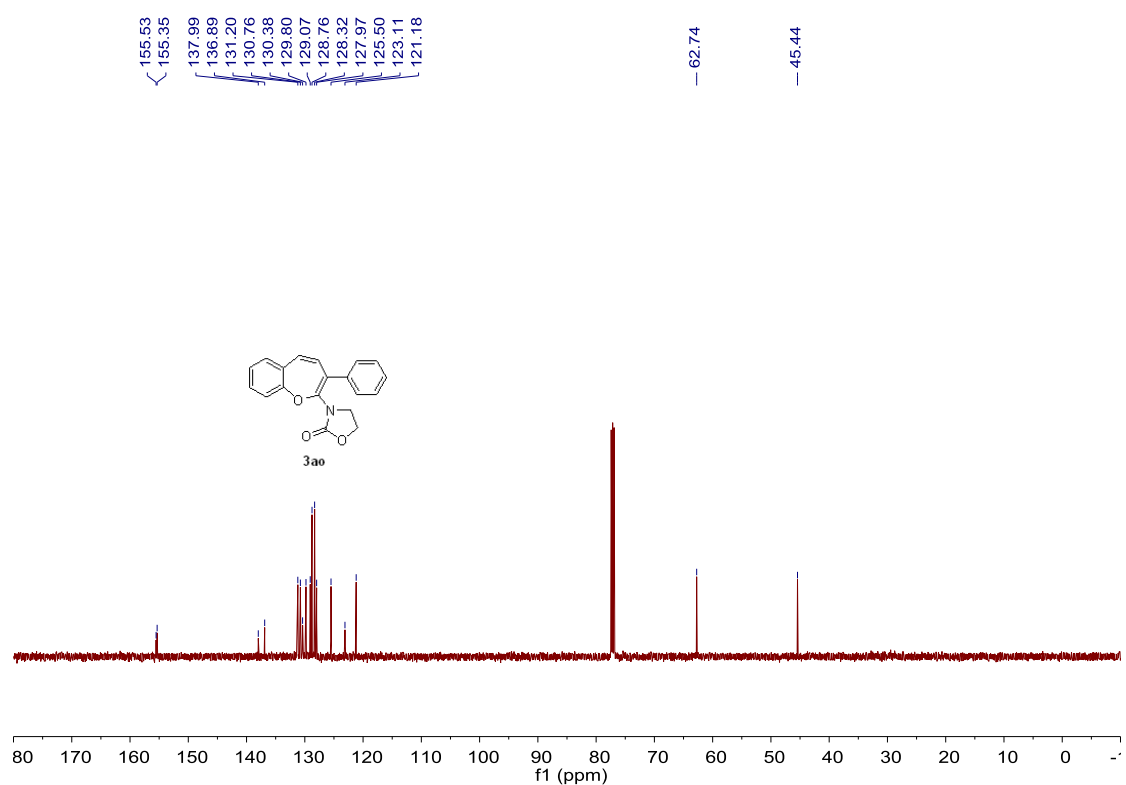



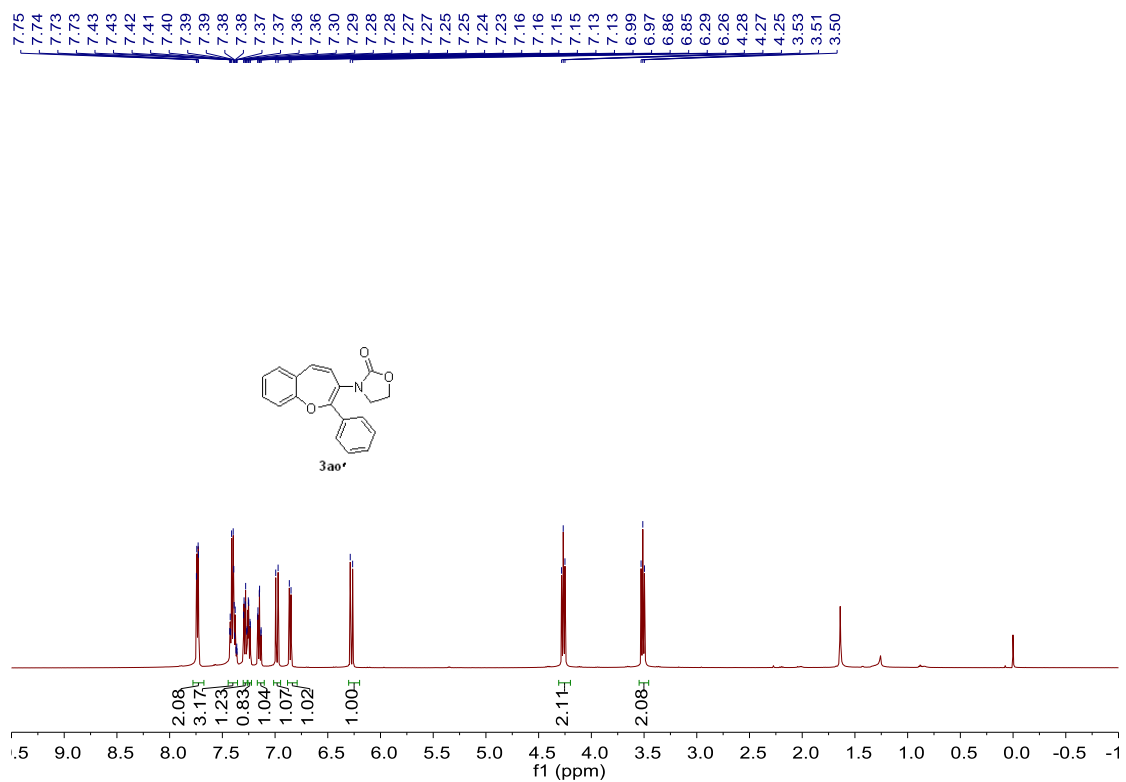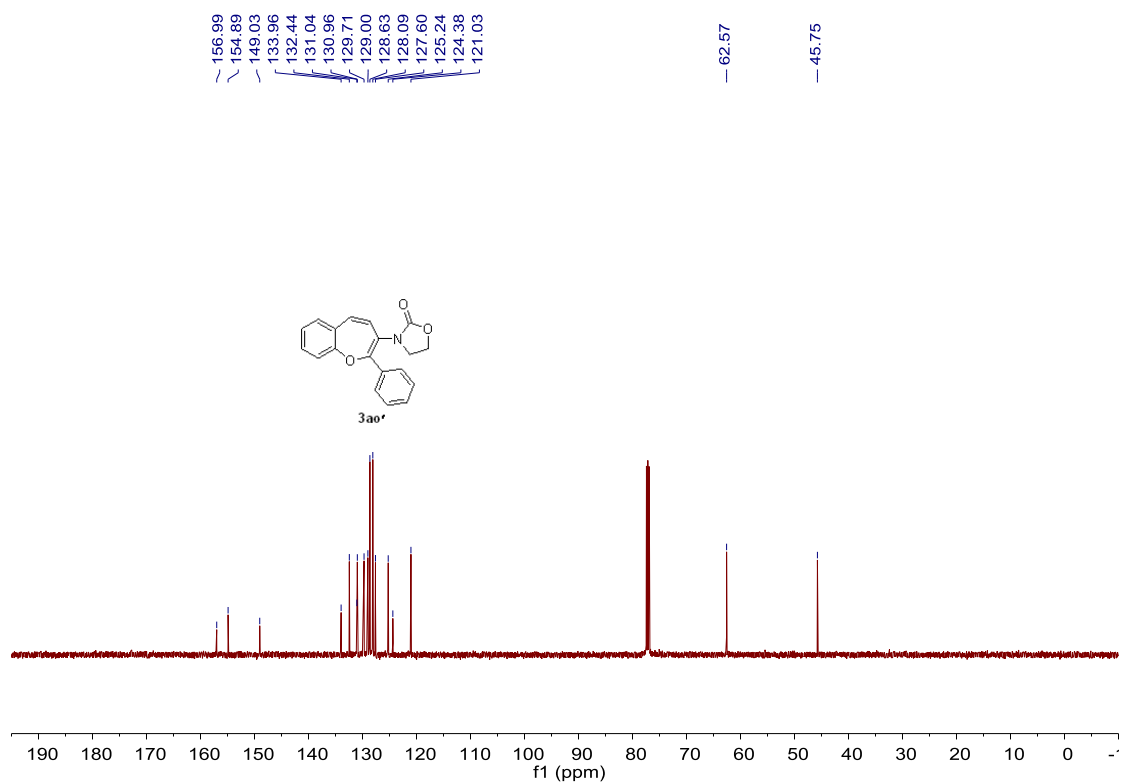

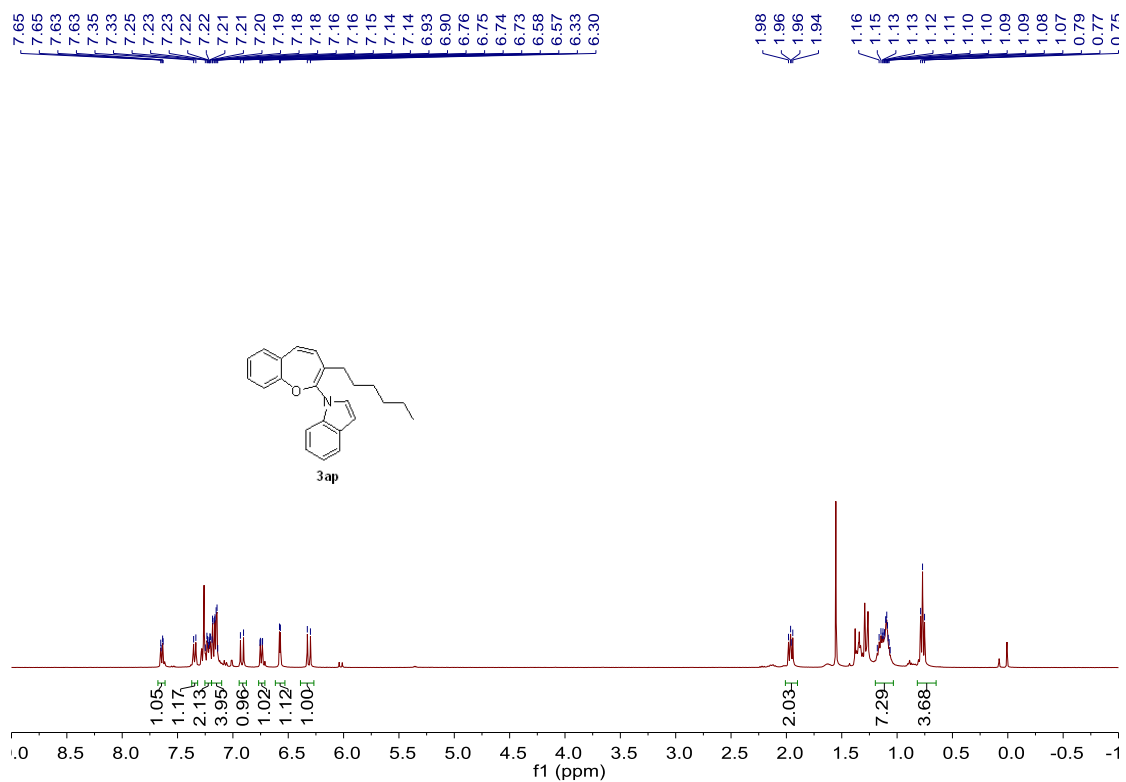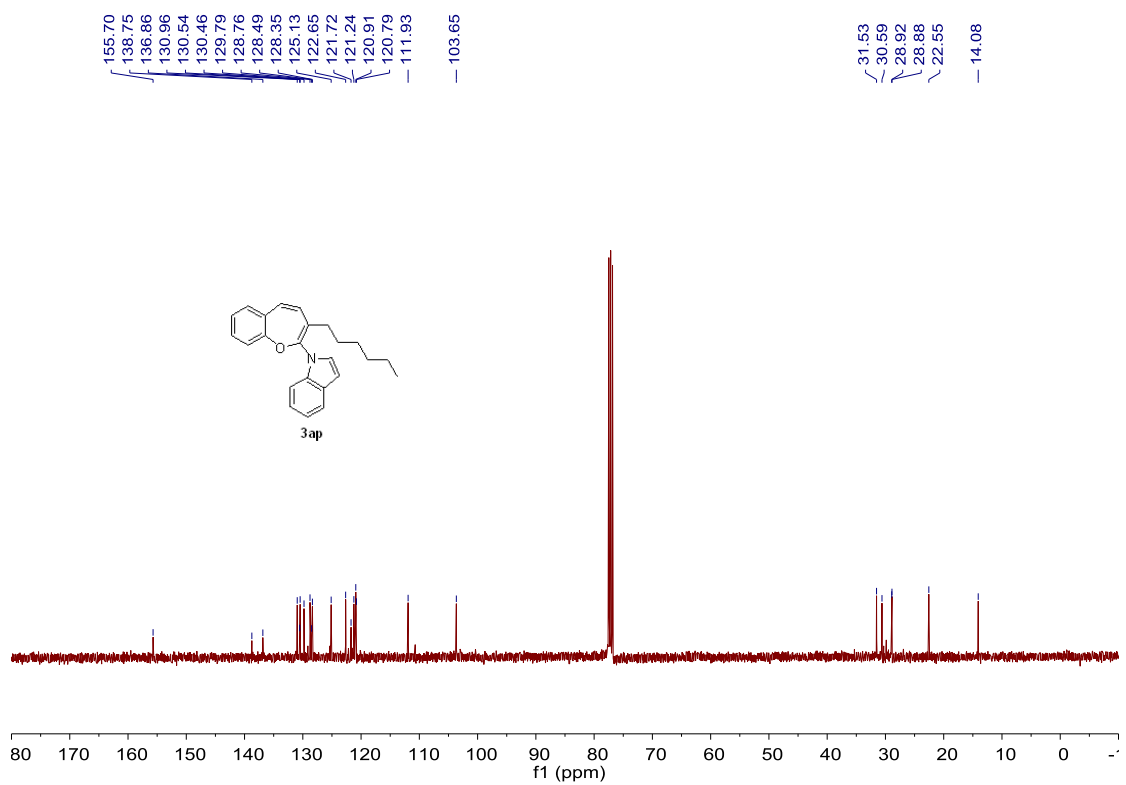

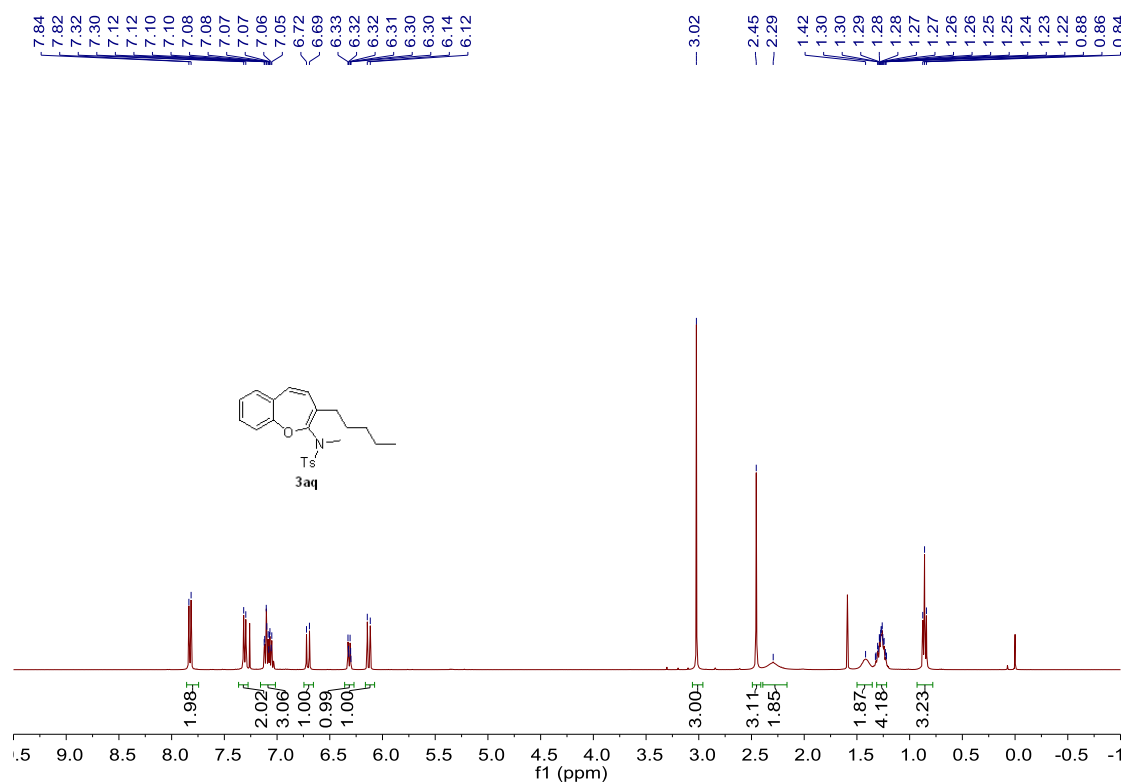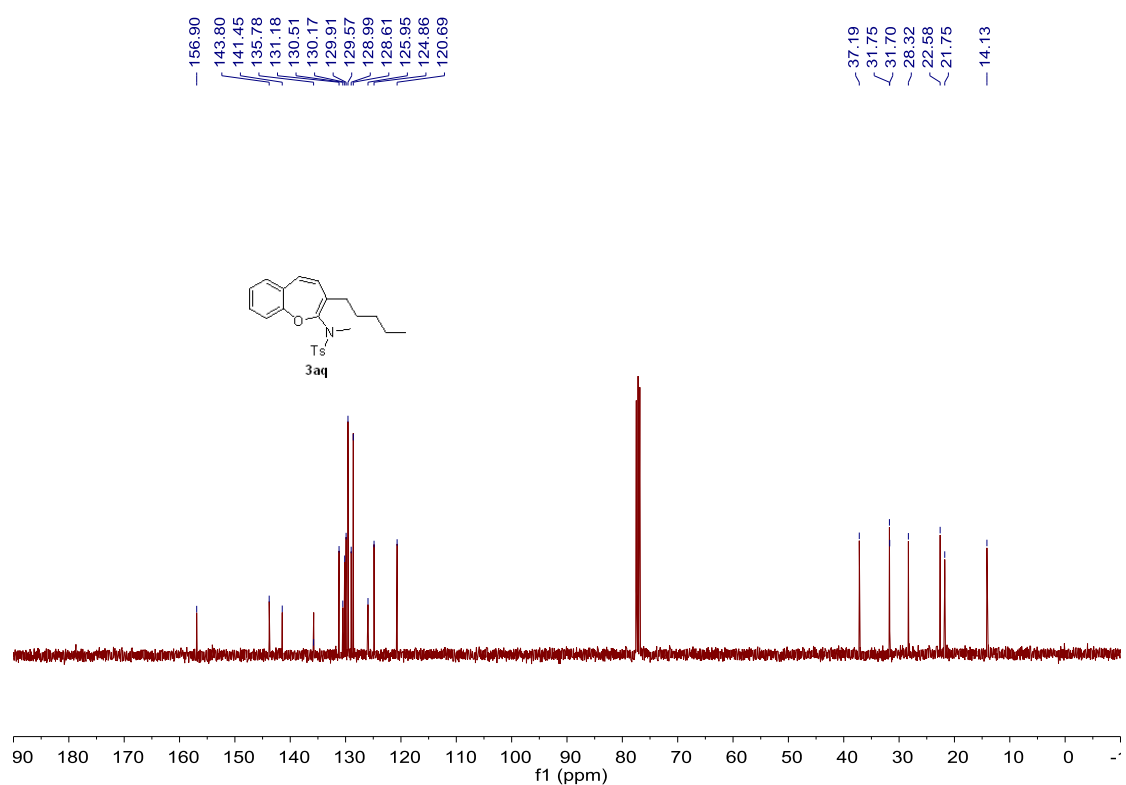

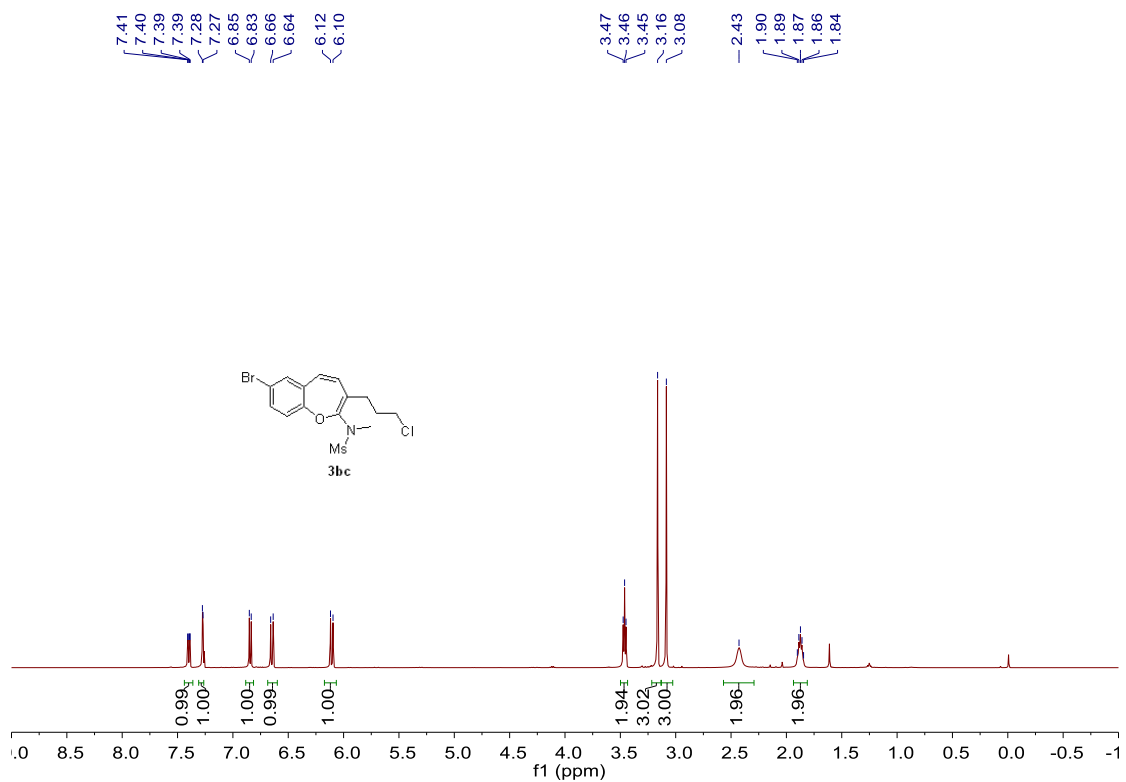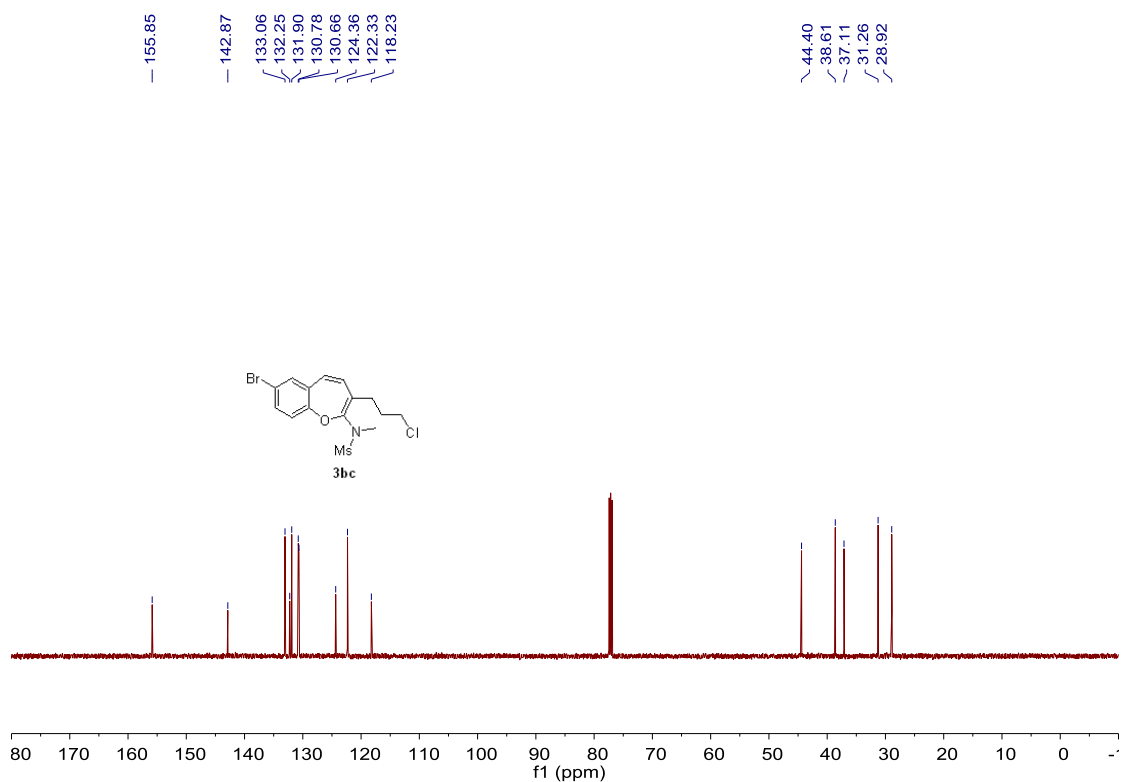

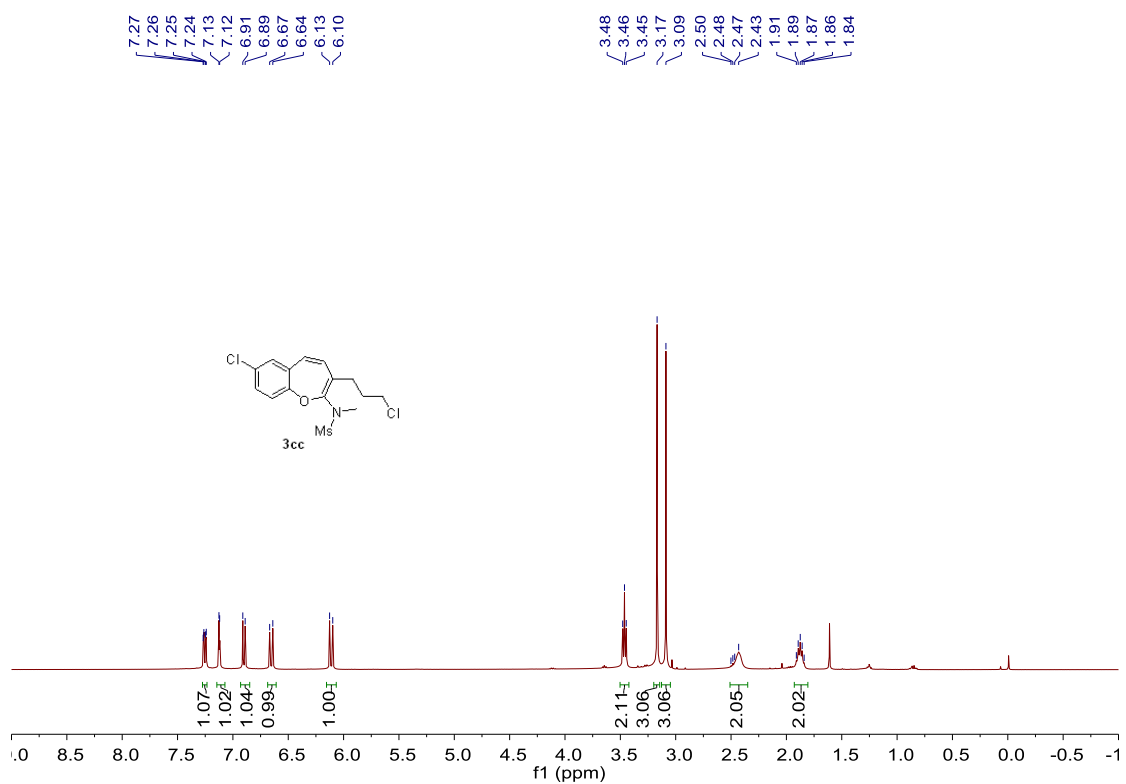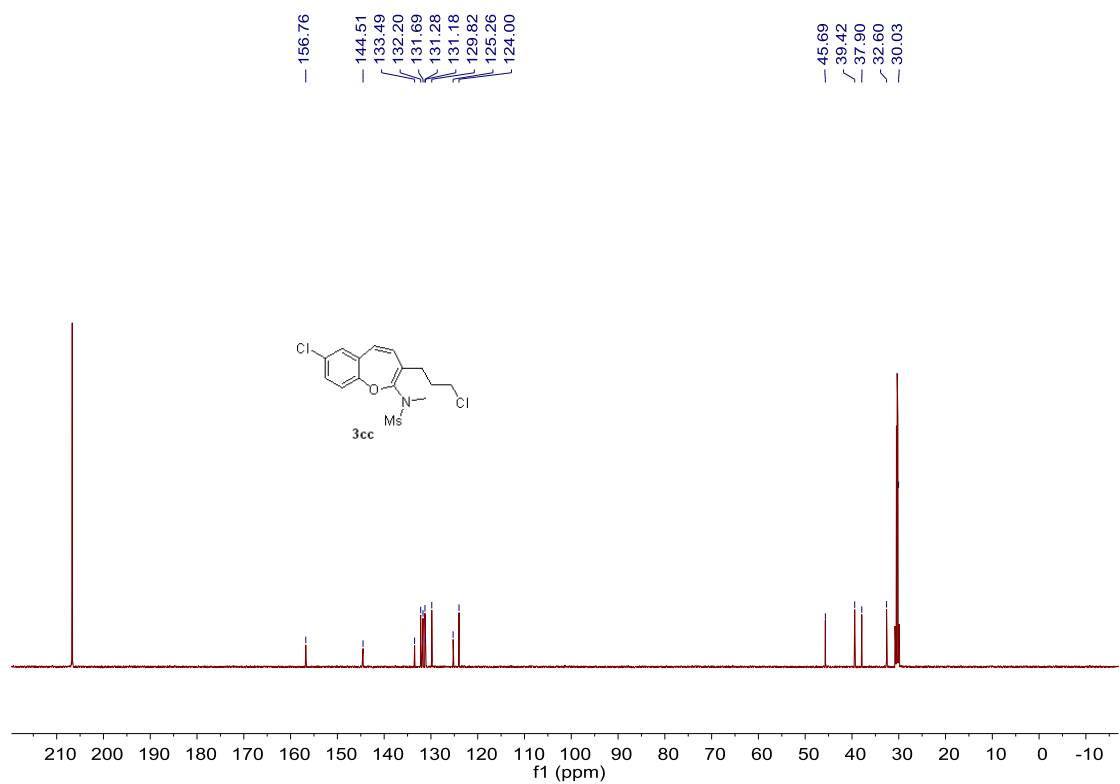

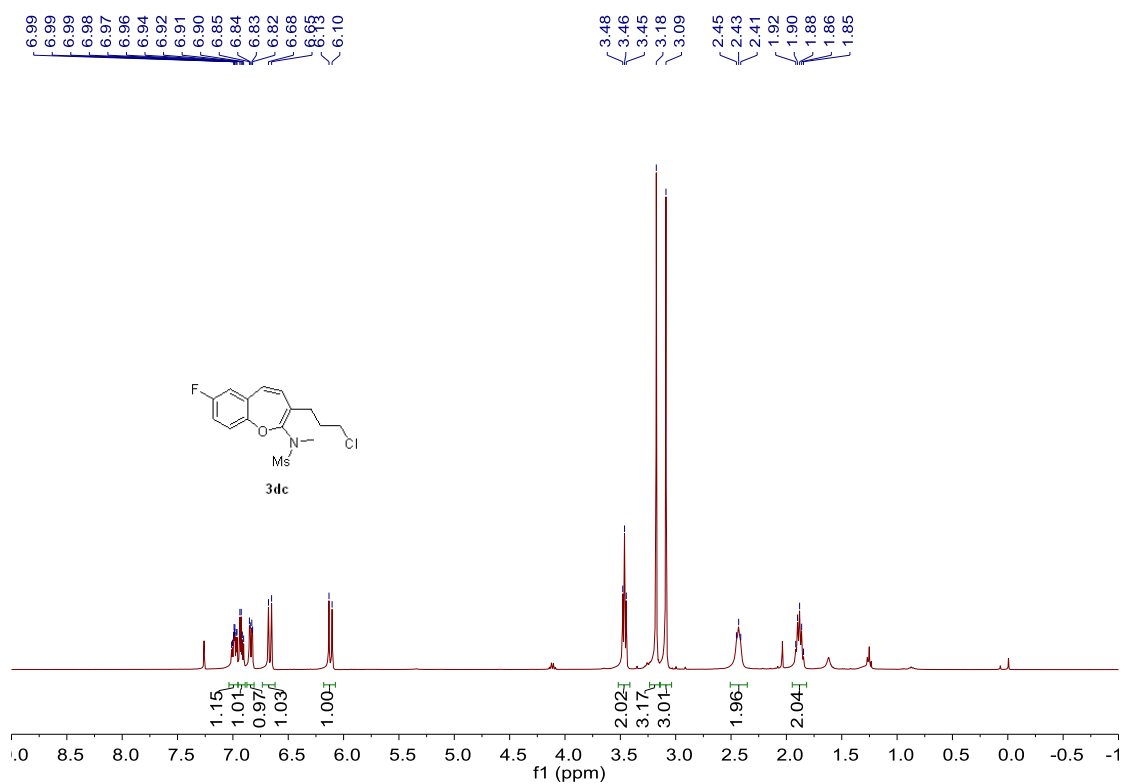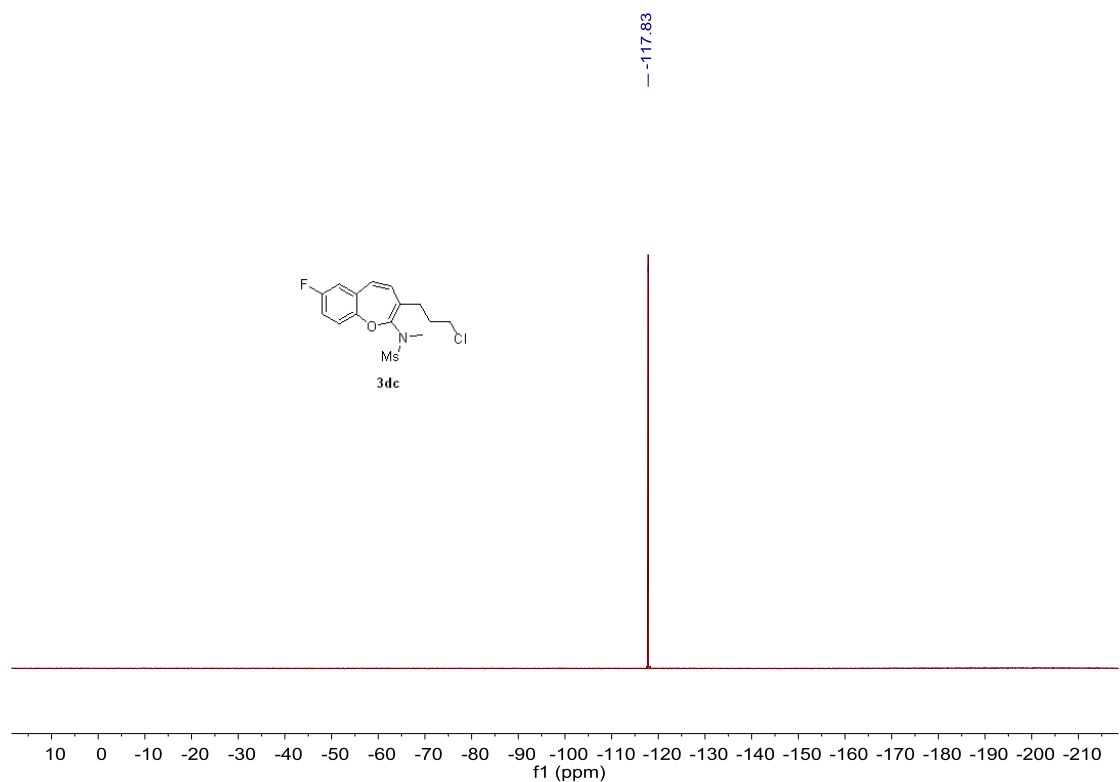

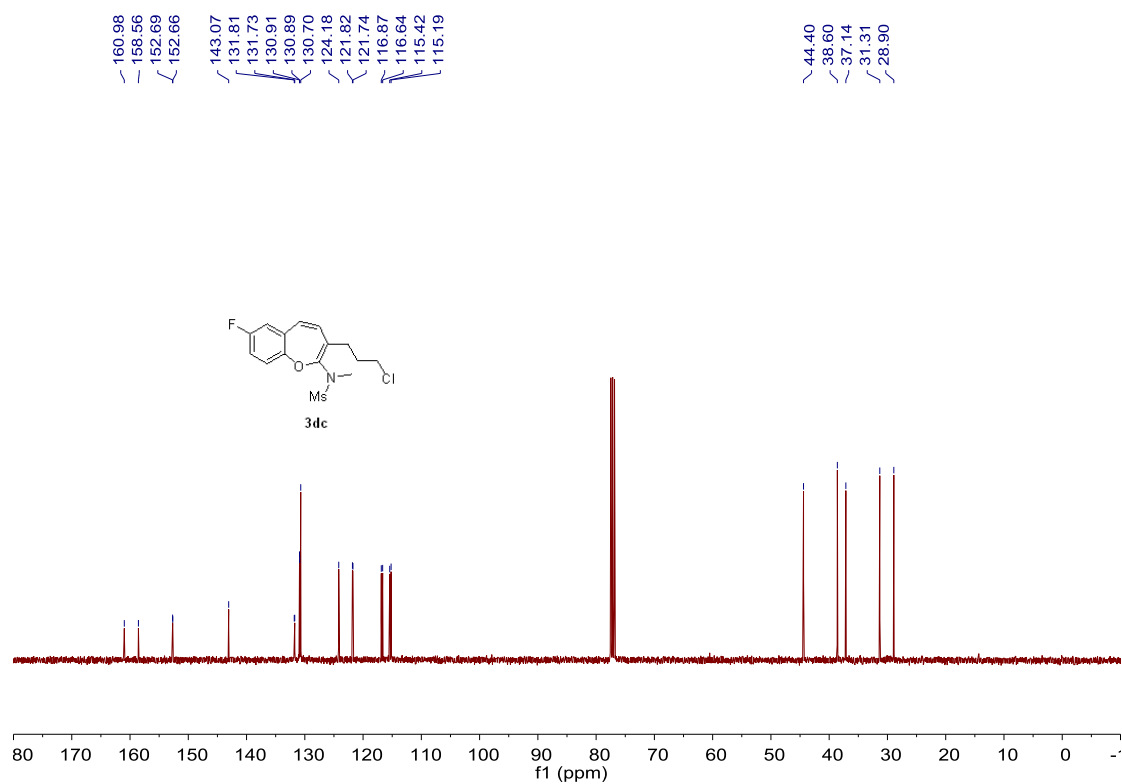

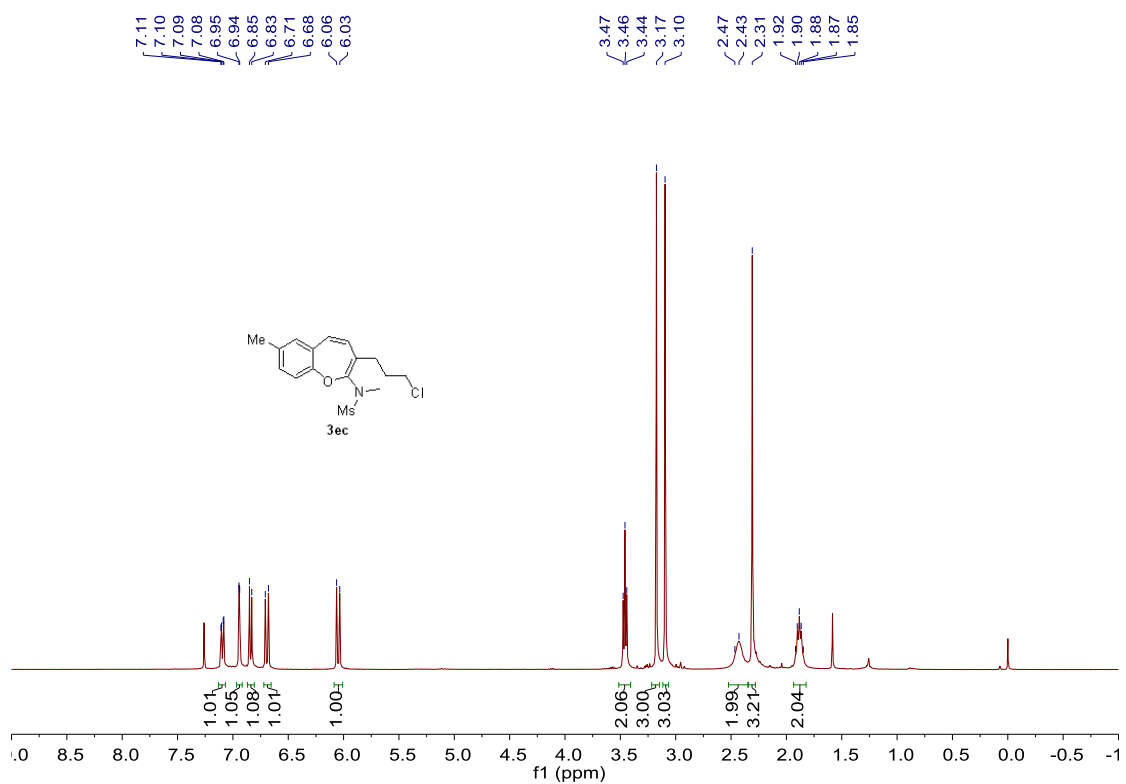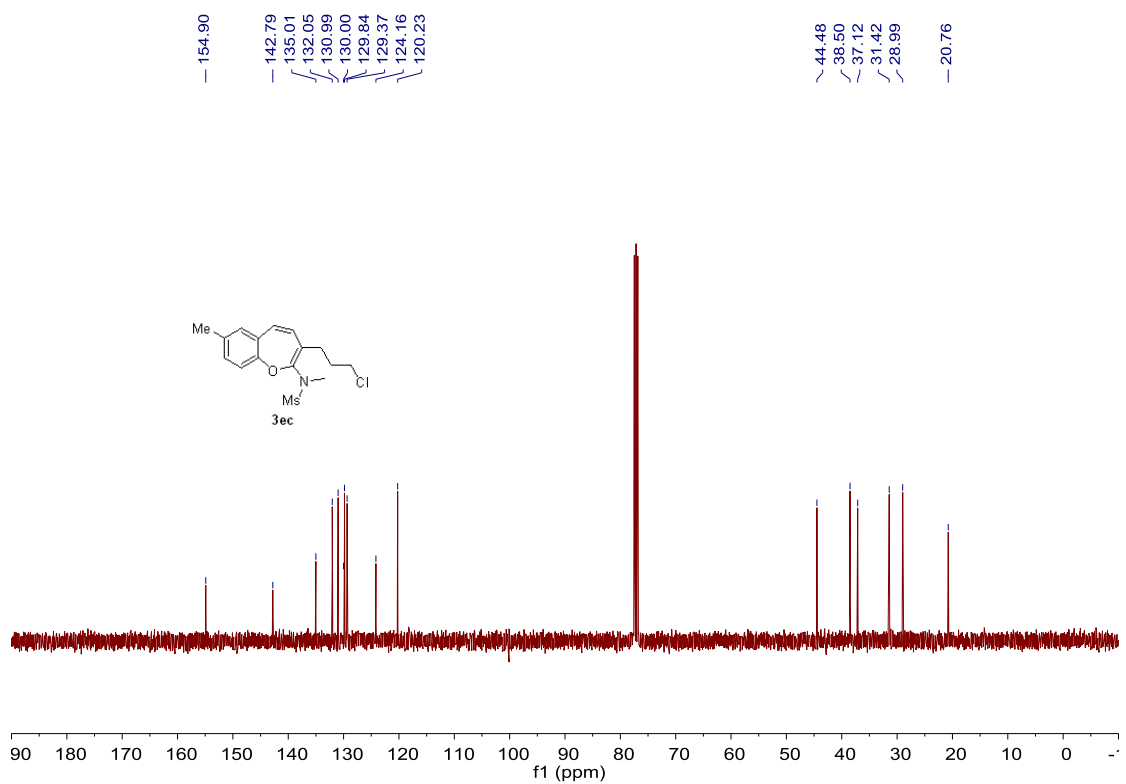



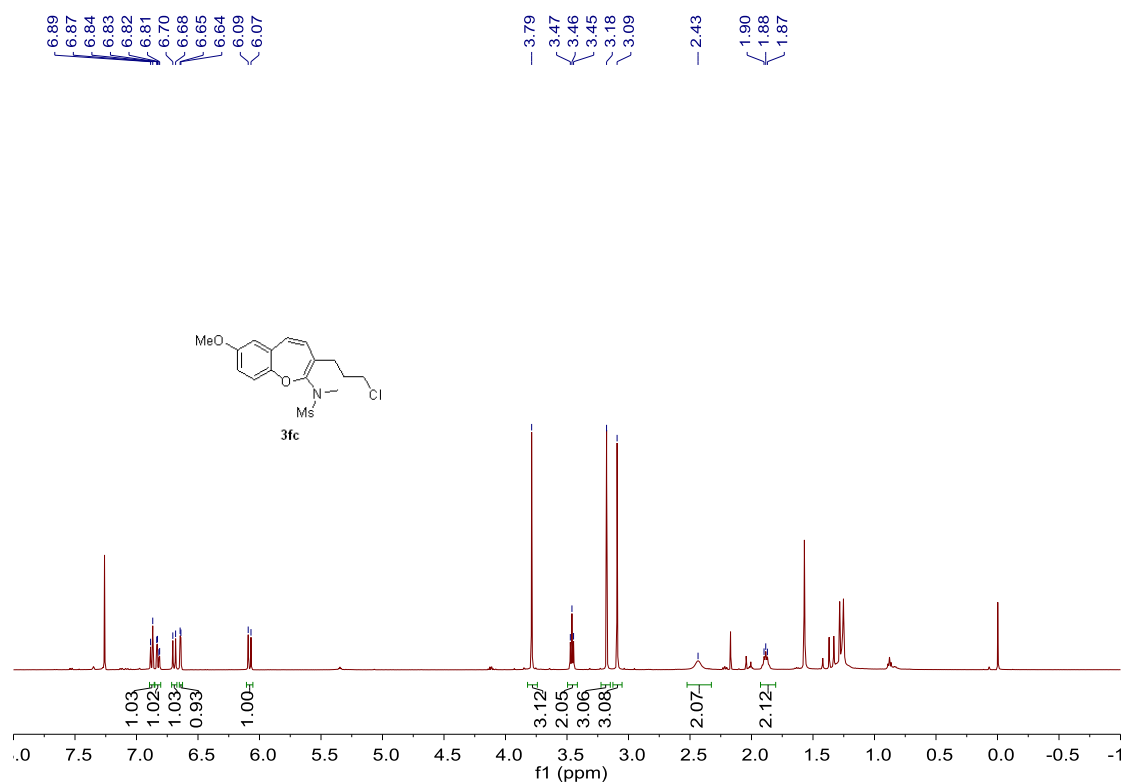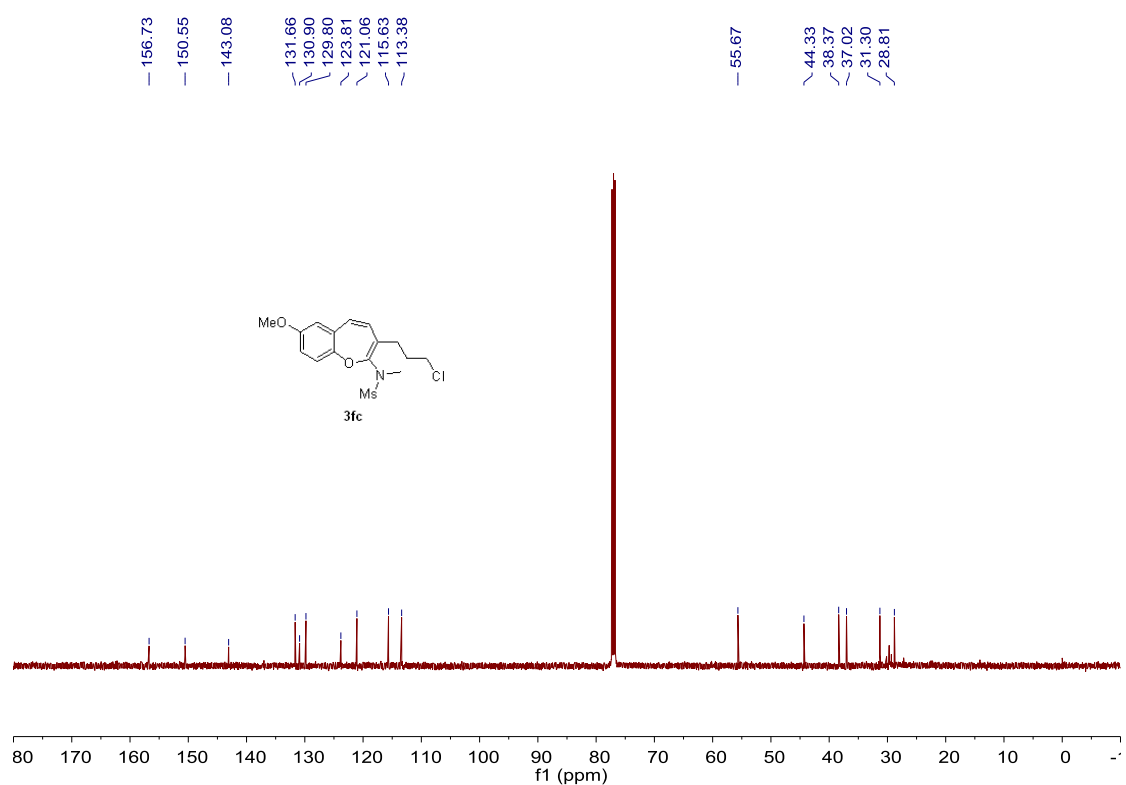

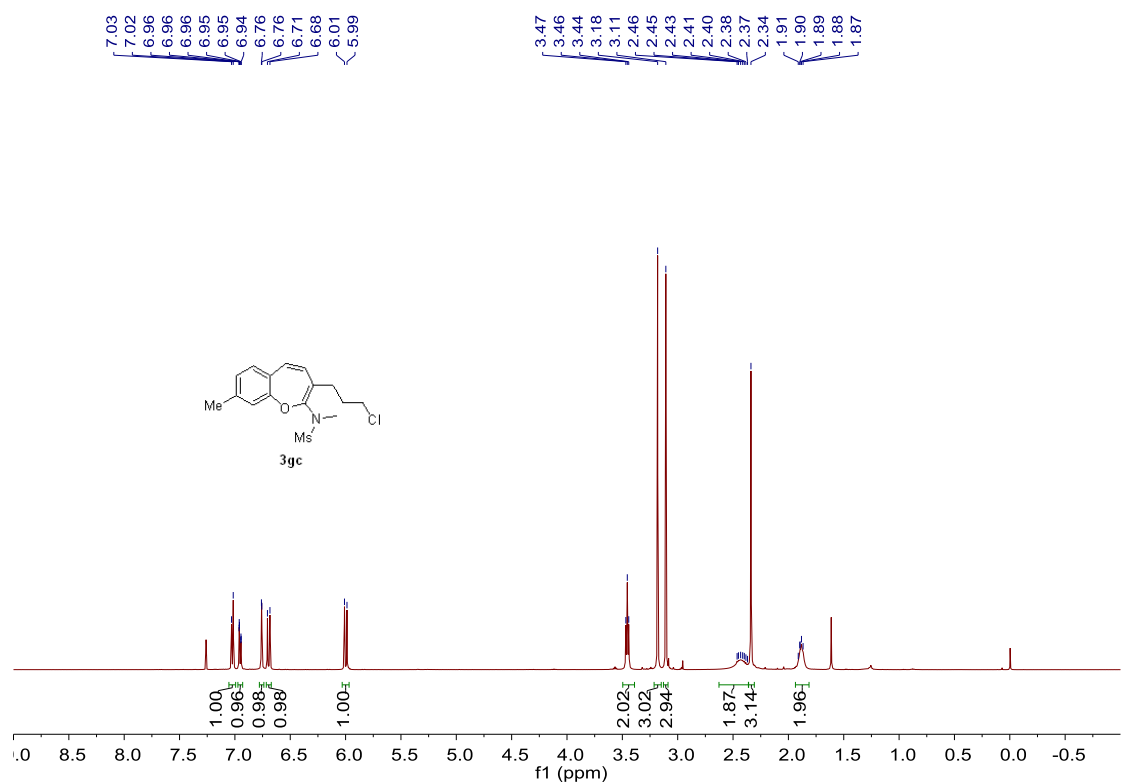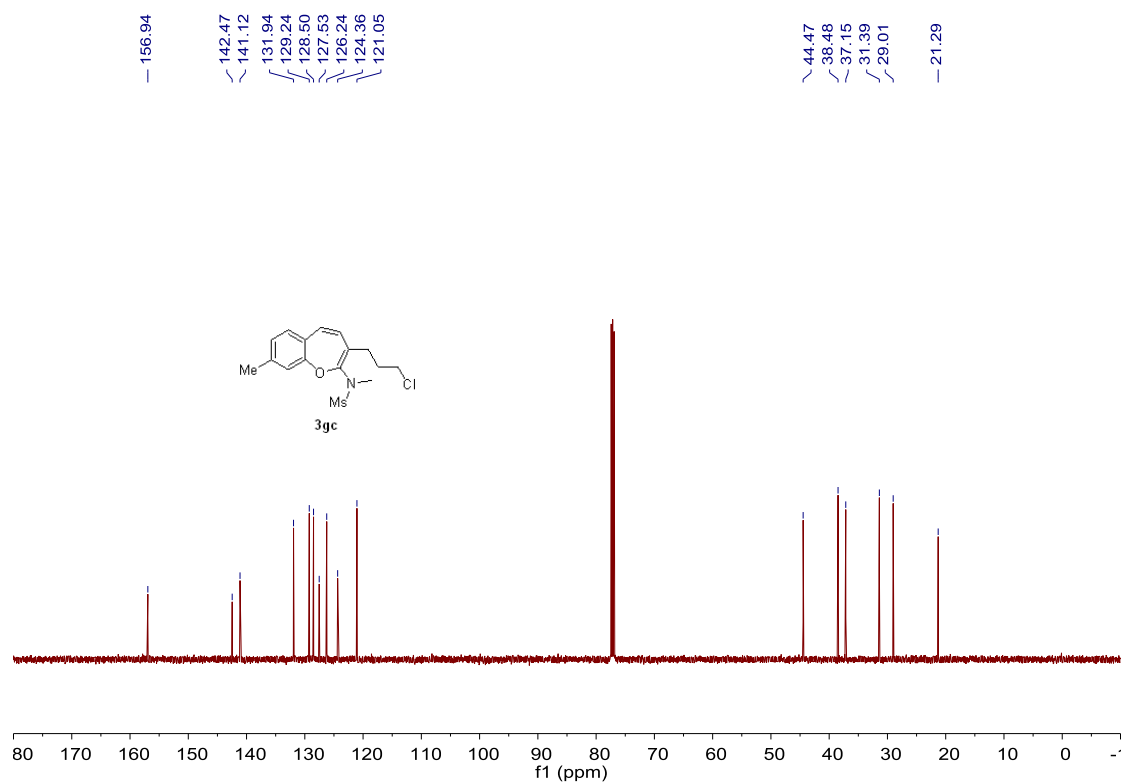

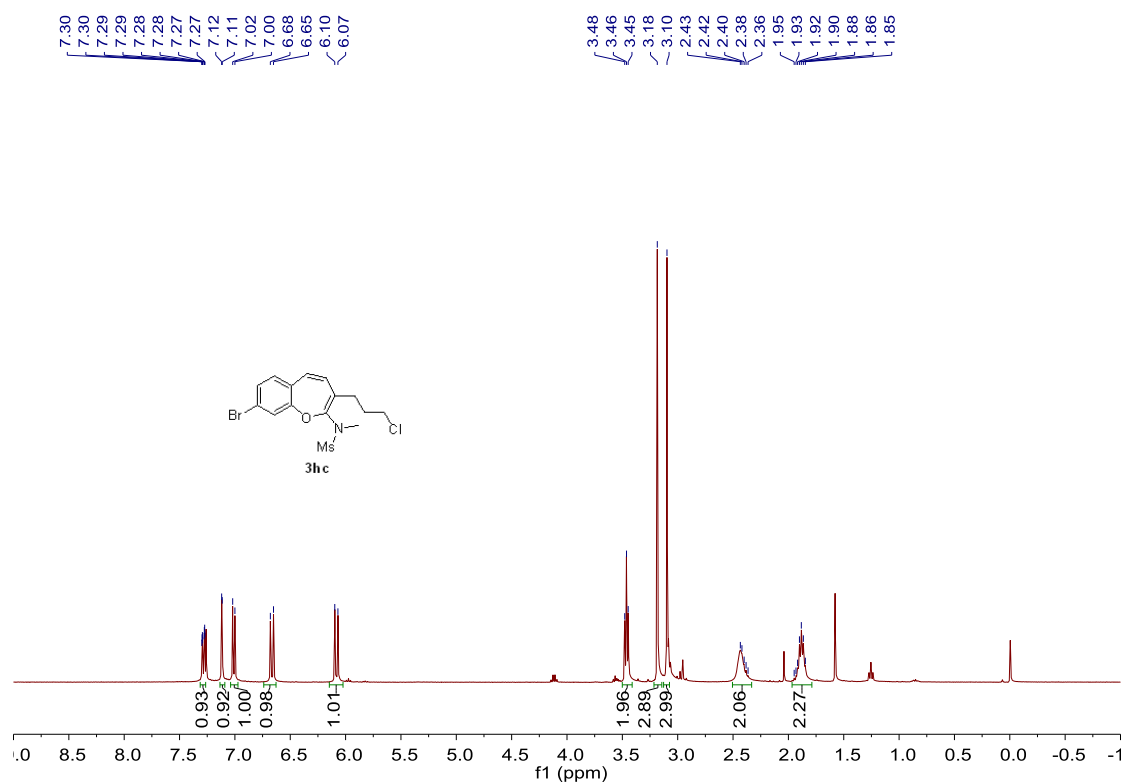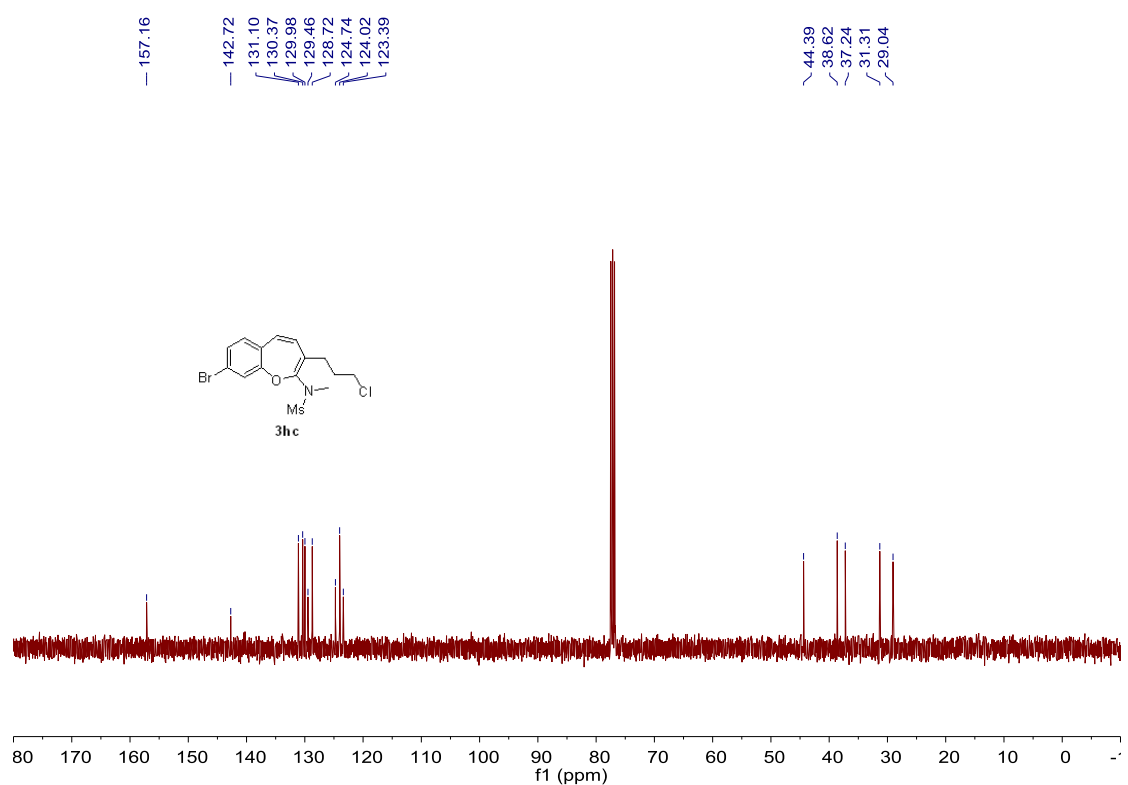

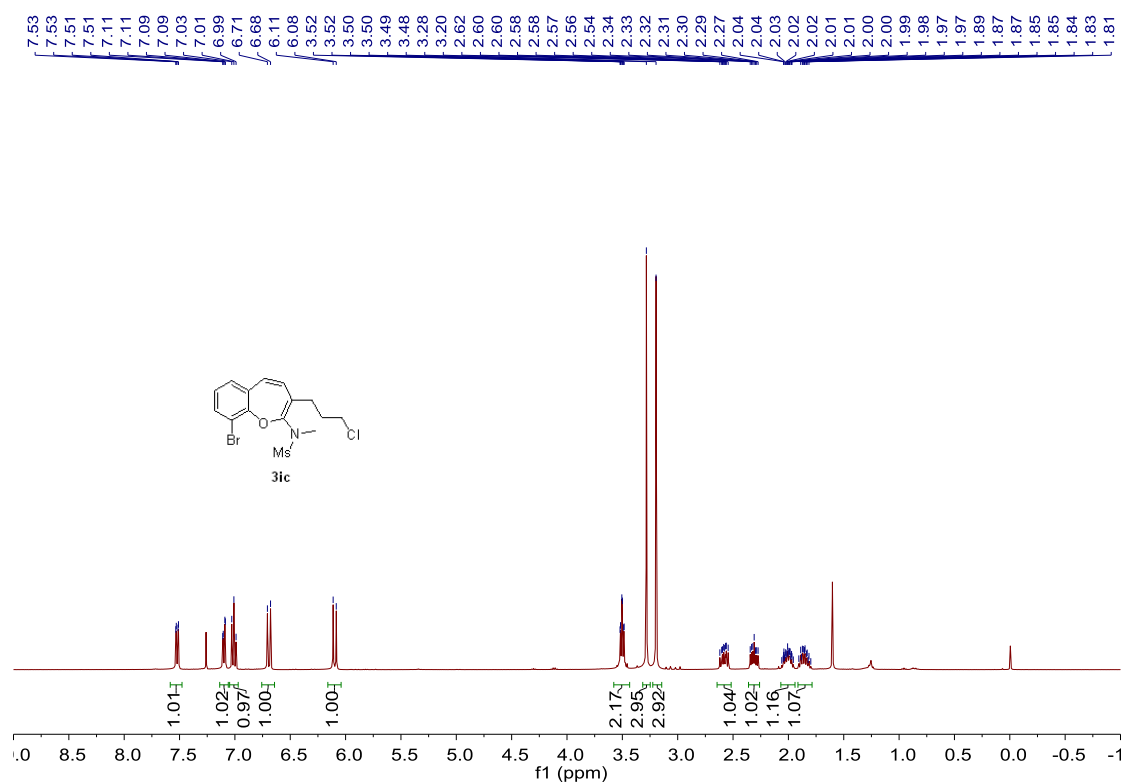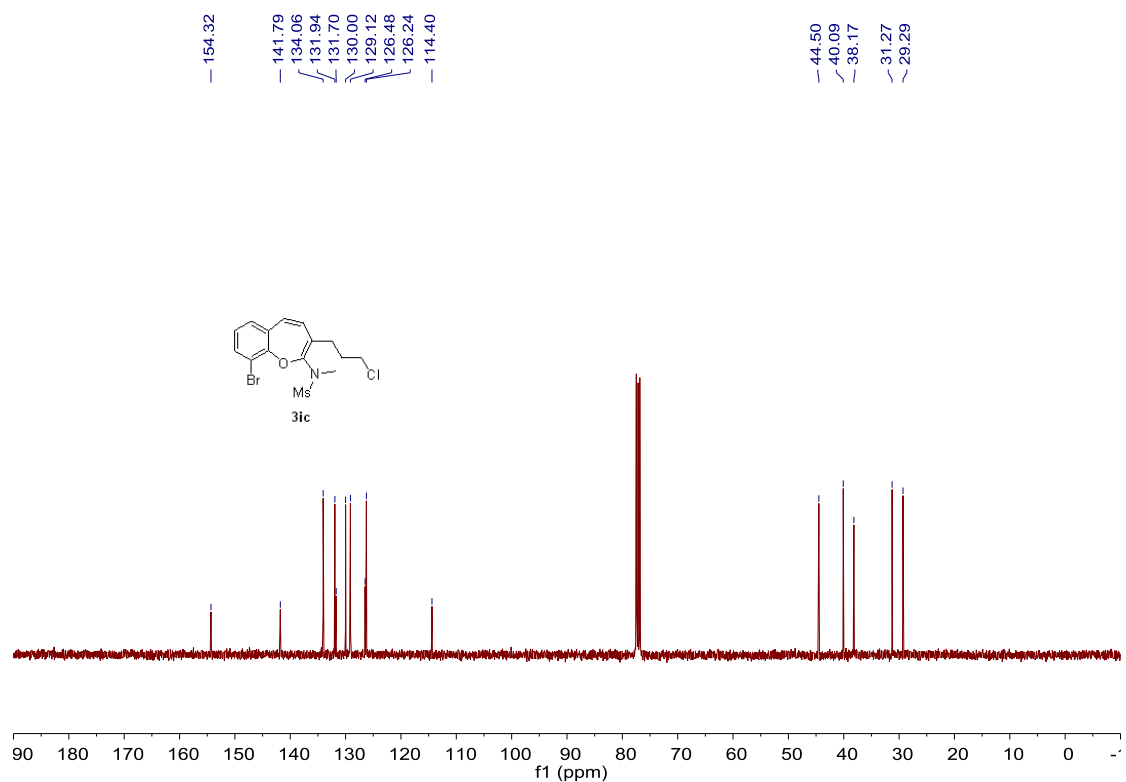

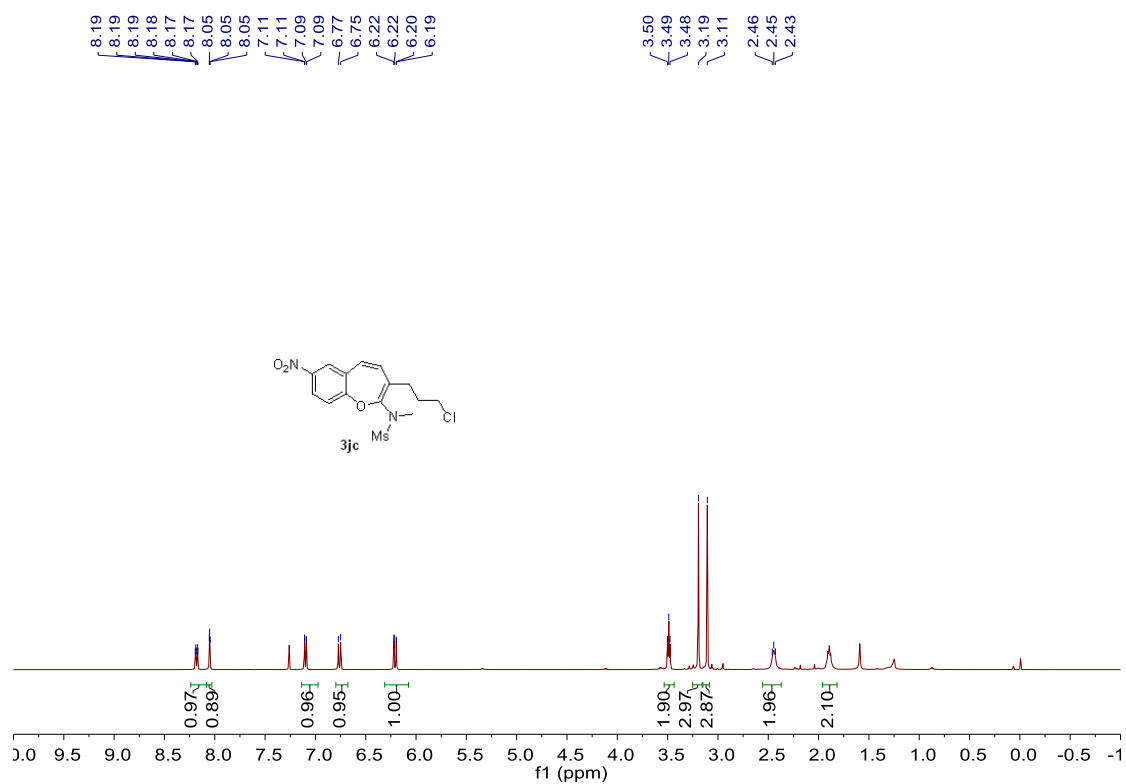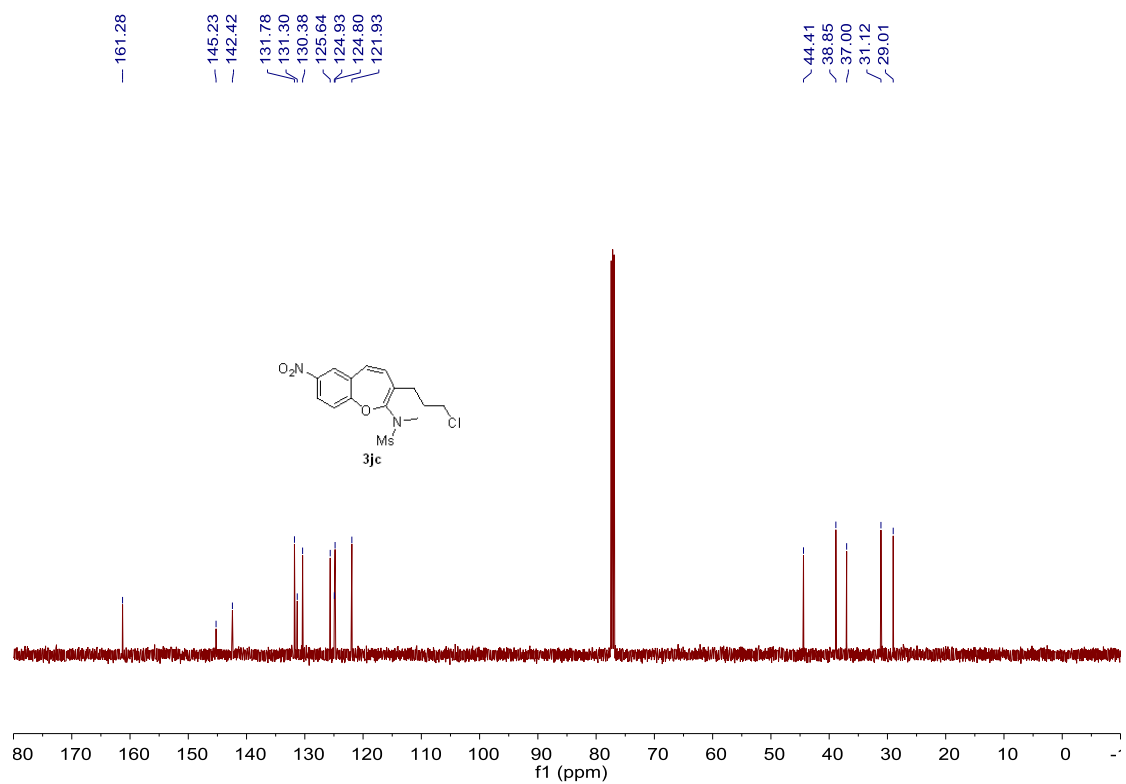

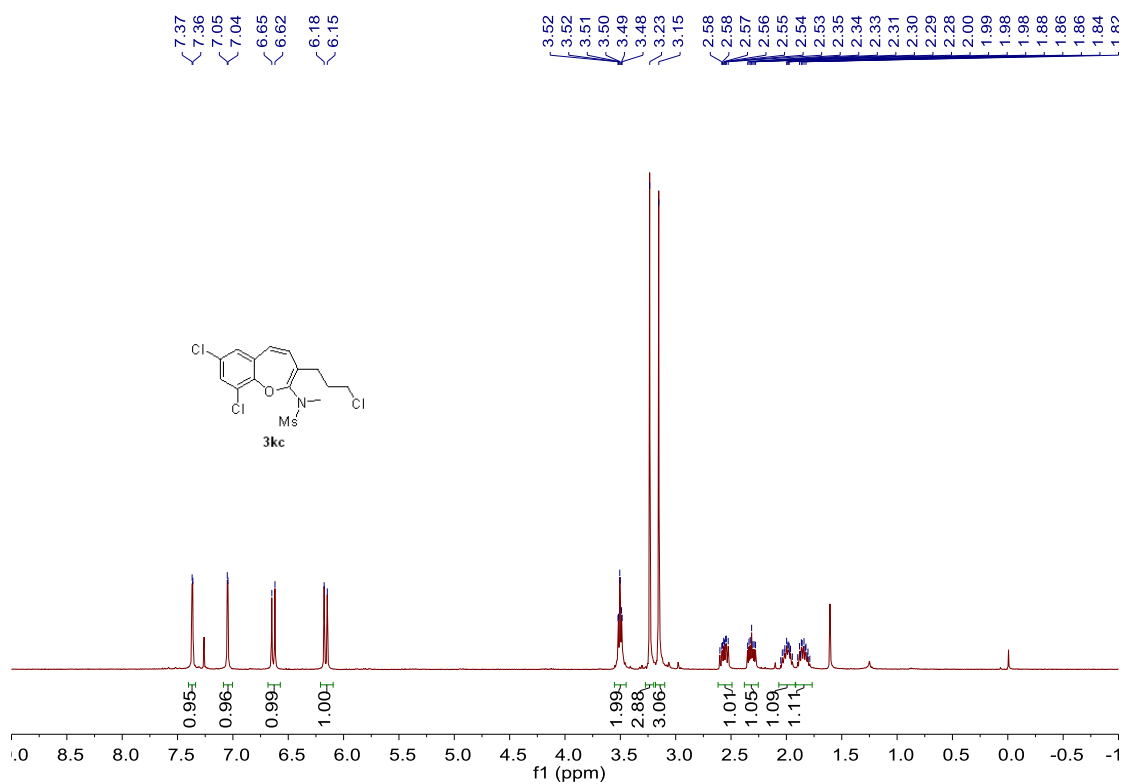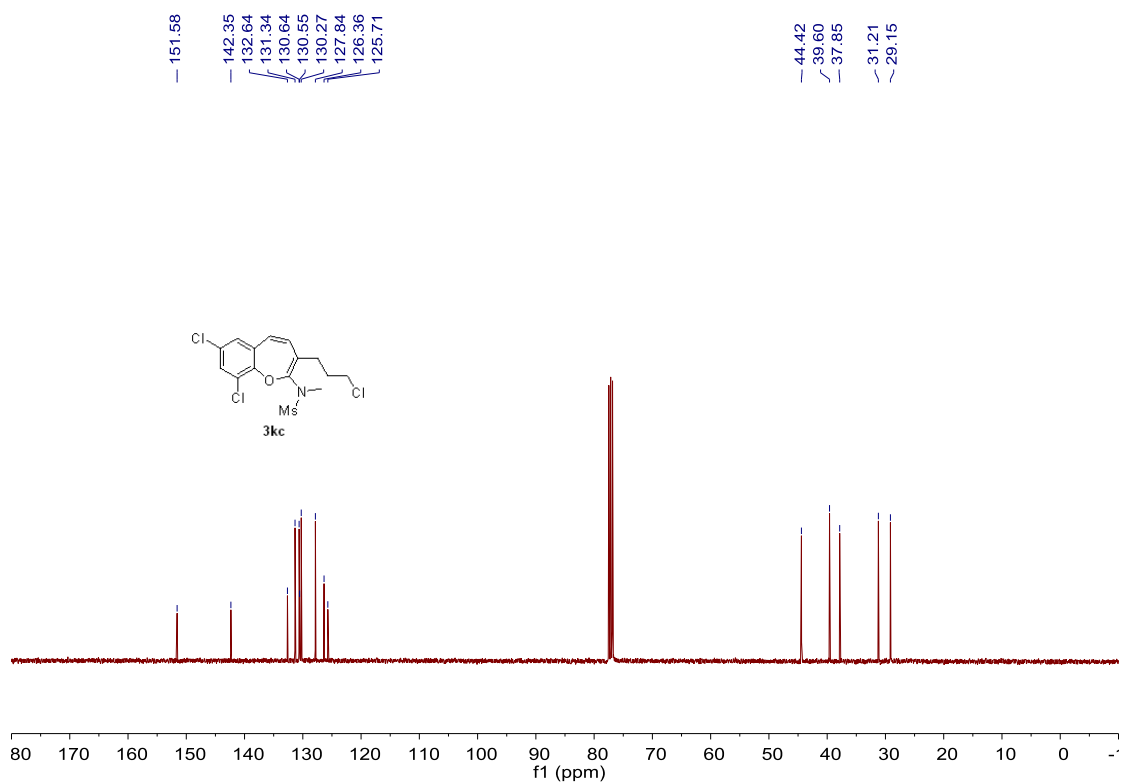

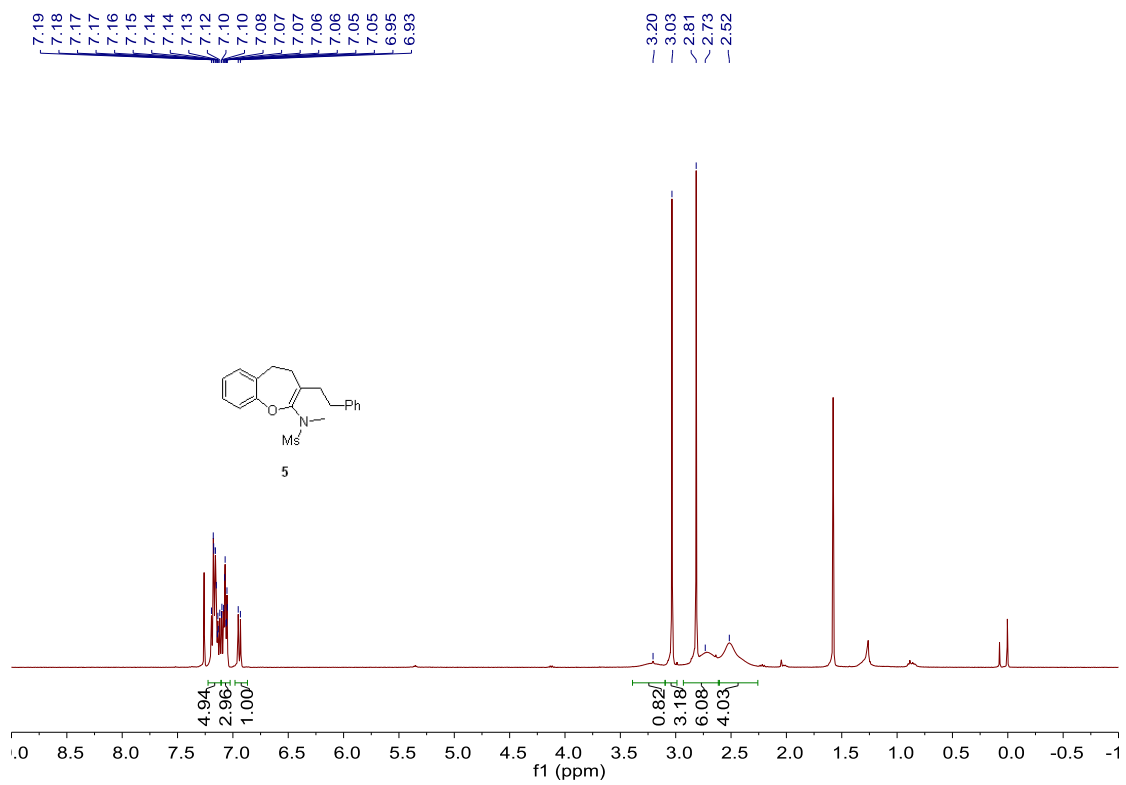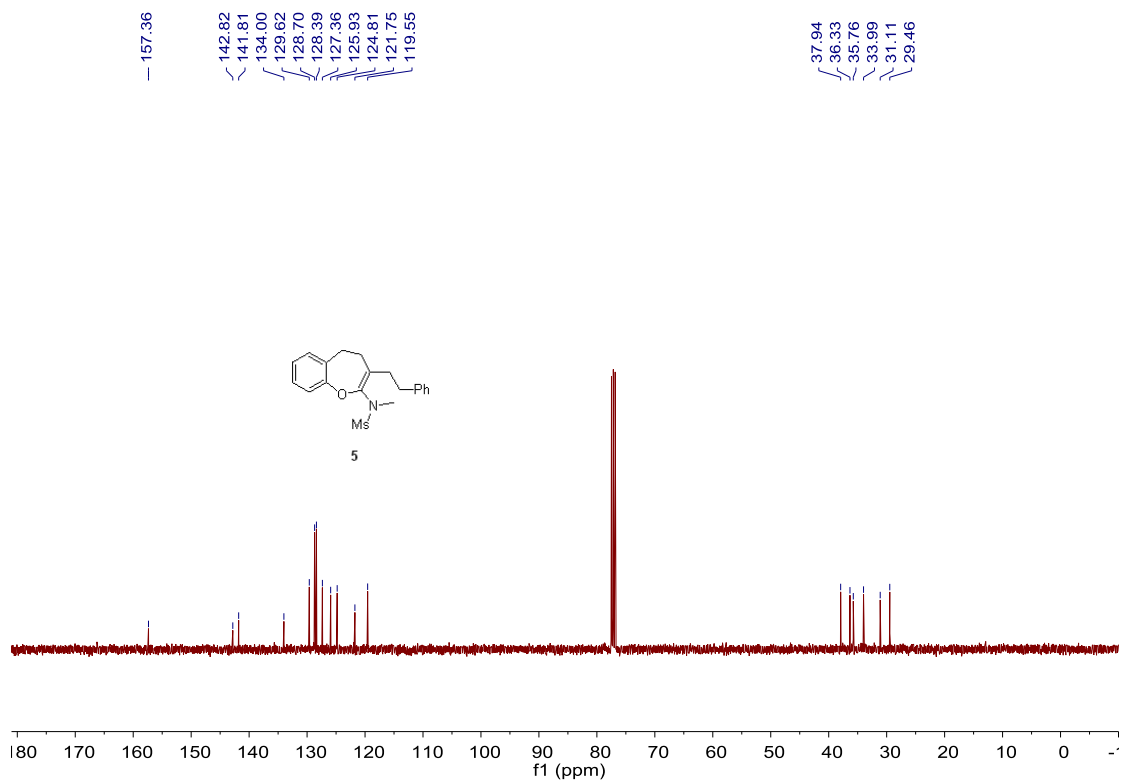

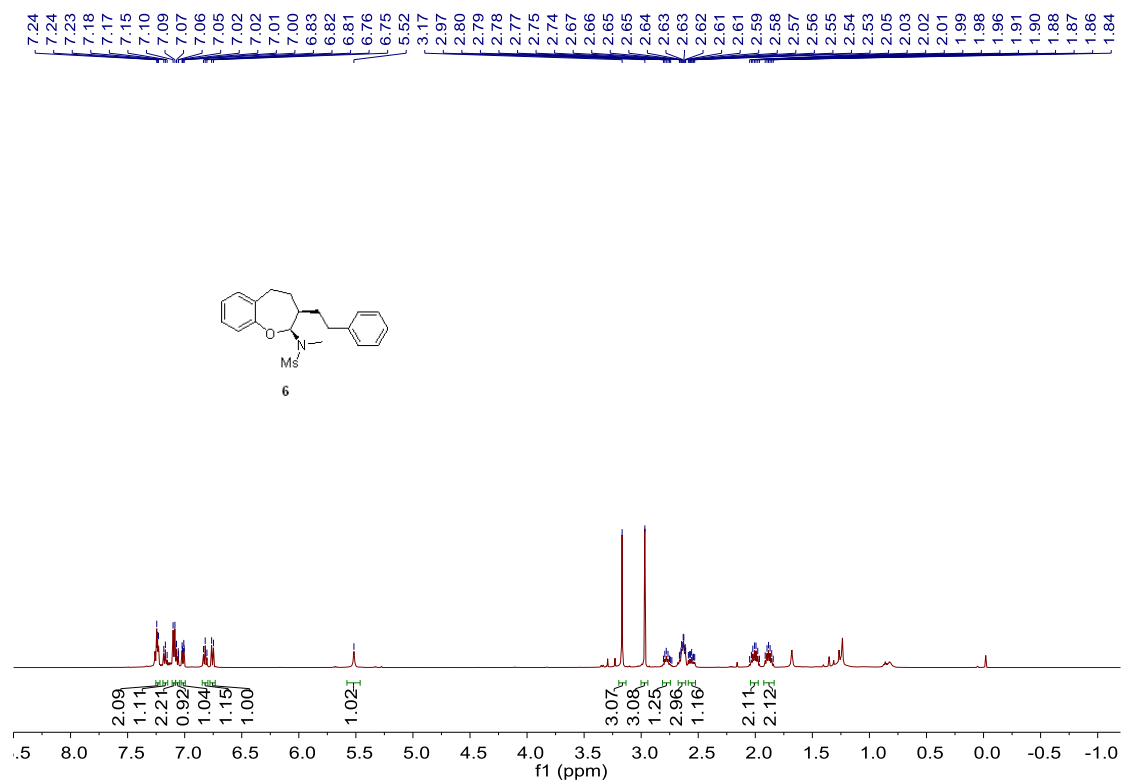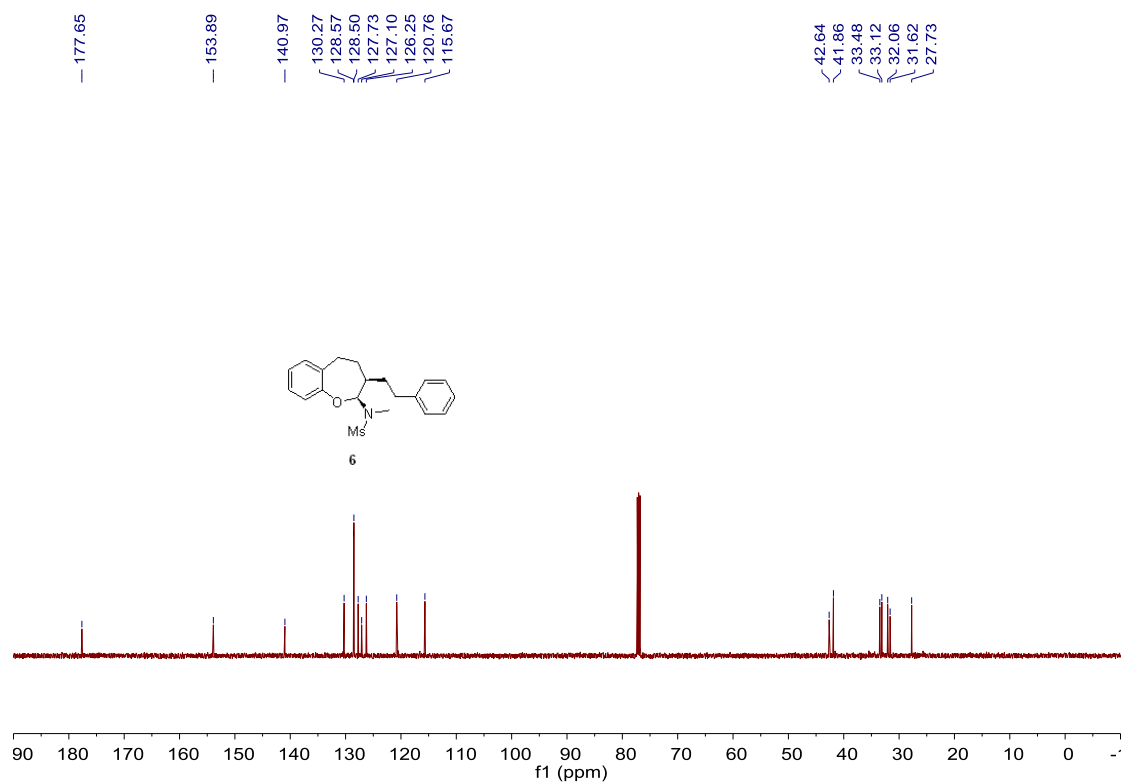



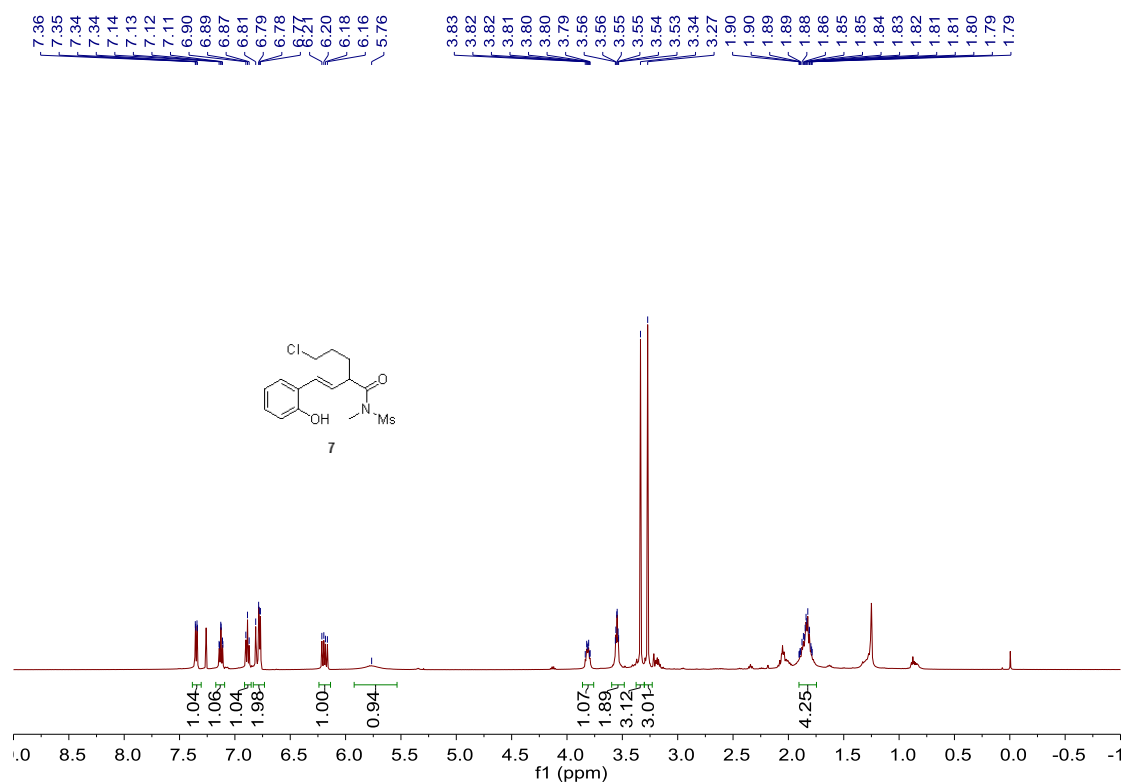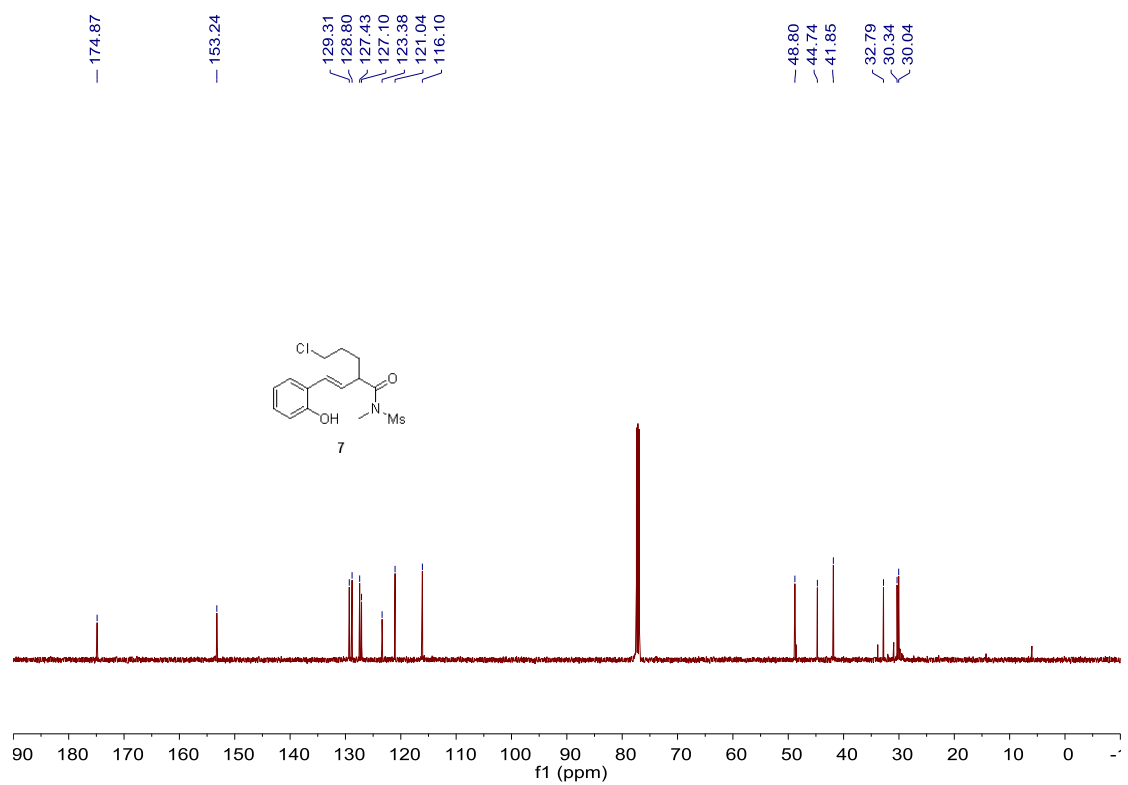

Supplement: c8cc06807k1.pdf [file c8cc06807k1.pdf]
